# Supplementary material for: Mitochondrial protein import determines lifespan through metabolic reprogramming and de novo serine biosynthesis
Source: PubMed Central journal article supplement (PMC8814026; doi:10.1038/s41467-022-28272-1), 2022-02-03

## SUPPLEMENTARY INFORMATION

### Mitochondrial protein import determines lifespan through metabolic reprogramming and *de novo* serine biosynthesis

Eirini Lionaki<sup>1,α\*</sup>, Ilias Gkikas<sup>1,2,α</sup>, Ioanna Daskalaki<sup>1,2</sup>, Maria-Konstantina Ioannidi<sup>3,4</sup>, Maria I. Klapa<sup>3</sup>  
& Nektarios Tavernarakis<sup>1,5\*</sup>

<sup>1</sup>Institute of Molecular Biology and Biotechnology, Foundation for Research and Technology - Hellas, <sup>2</sup>Department of Biology, School of Sciences and Engineering, University of Crete, <sup>3</sup>Metabolic Engineering and Systems Biology Laboratory, Institute of Chemical Engineering Sciences, Foundation for Research and Technology-Hellas (FORTH/ICE-HT), Patras, Greece; <sup>4</sup>Department of Biology, University of Patras, Patras, Greece; <sup>5</sup>Department of Basic Sciences, Faculty of Medicine, University of Crete, Heraklion 71110, Crete, Greece.

\*Correspondence and requests for materials should be addressed to E.L. (e-mail: lionaki@imbb.forth.gr), or to N.T. (e-mail: tavernarakis@imbb.forth.gr).

### CONTENTS

1. Supplementary Figures 1-10
2. Supplementary Table 1
3. Supplementary Table 2
4. Supplementary Table 3
5. Images of blots included in Supplementary Figure 3e

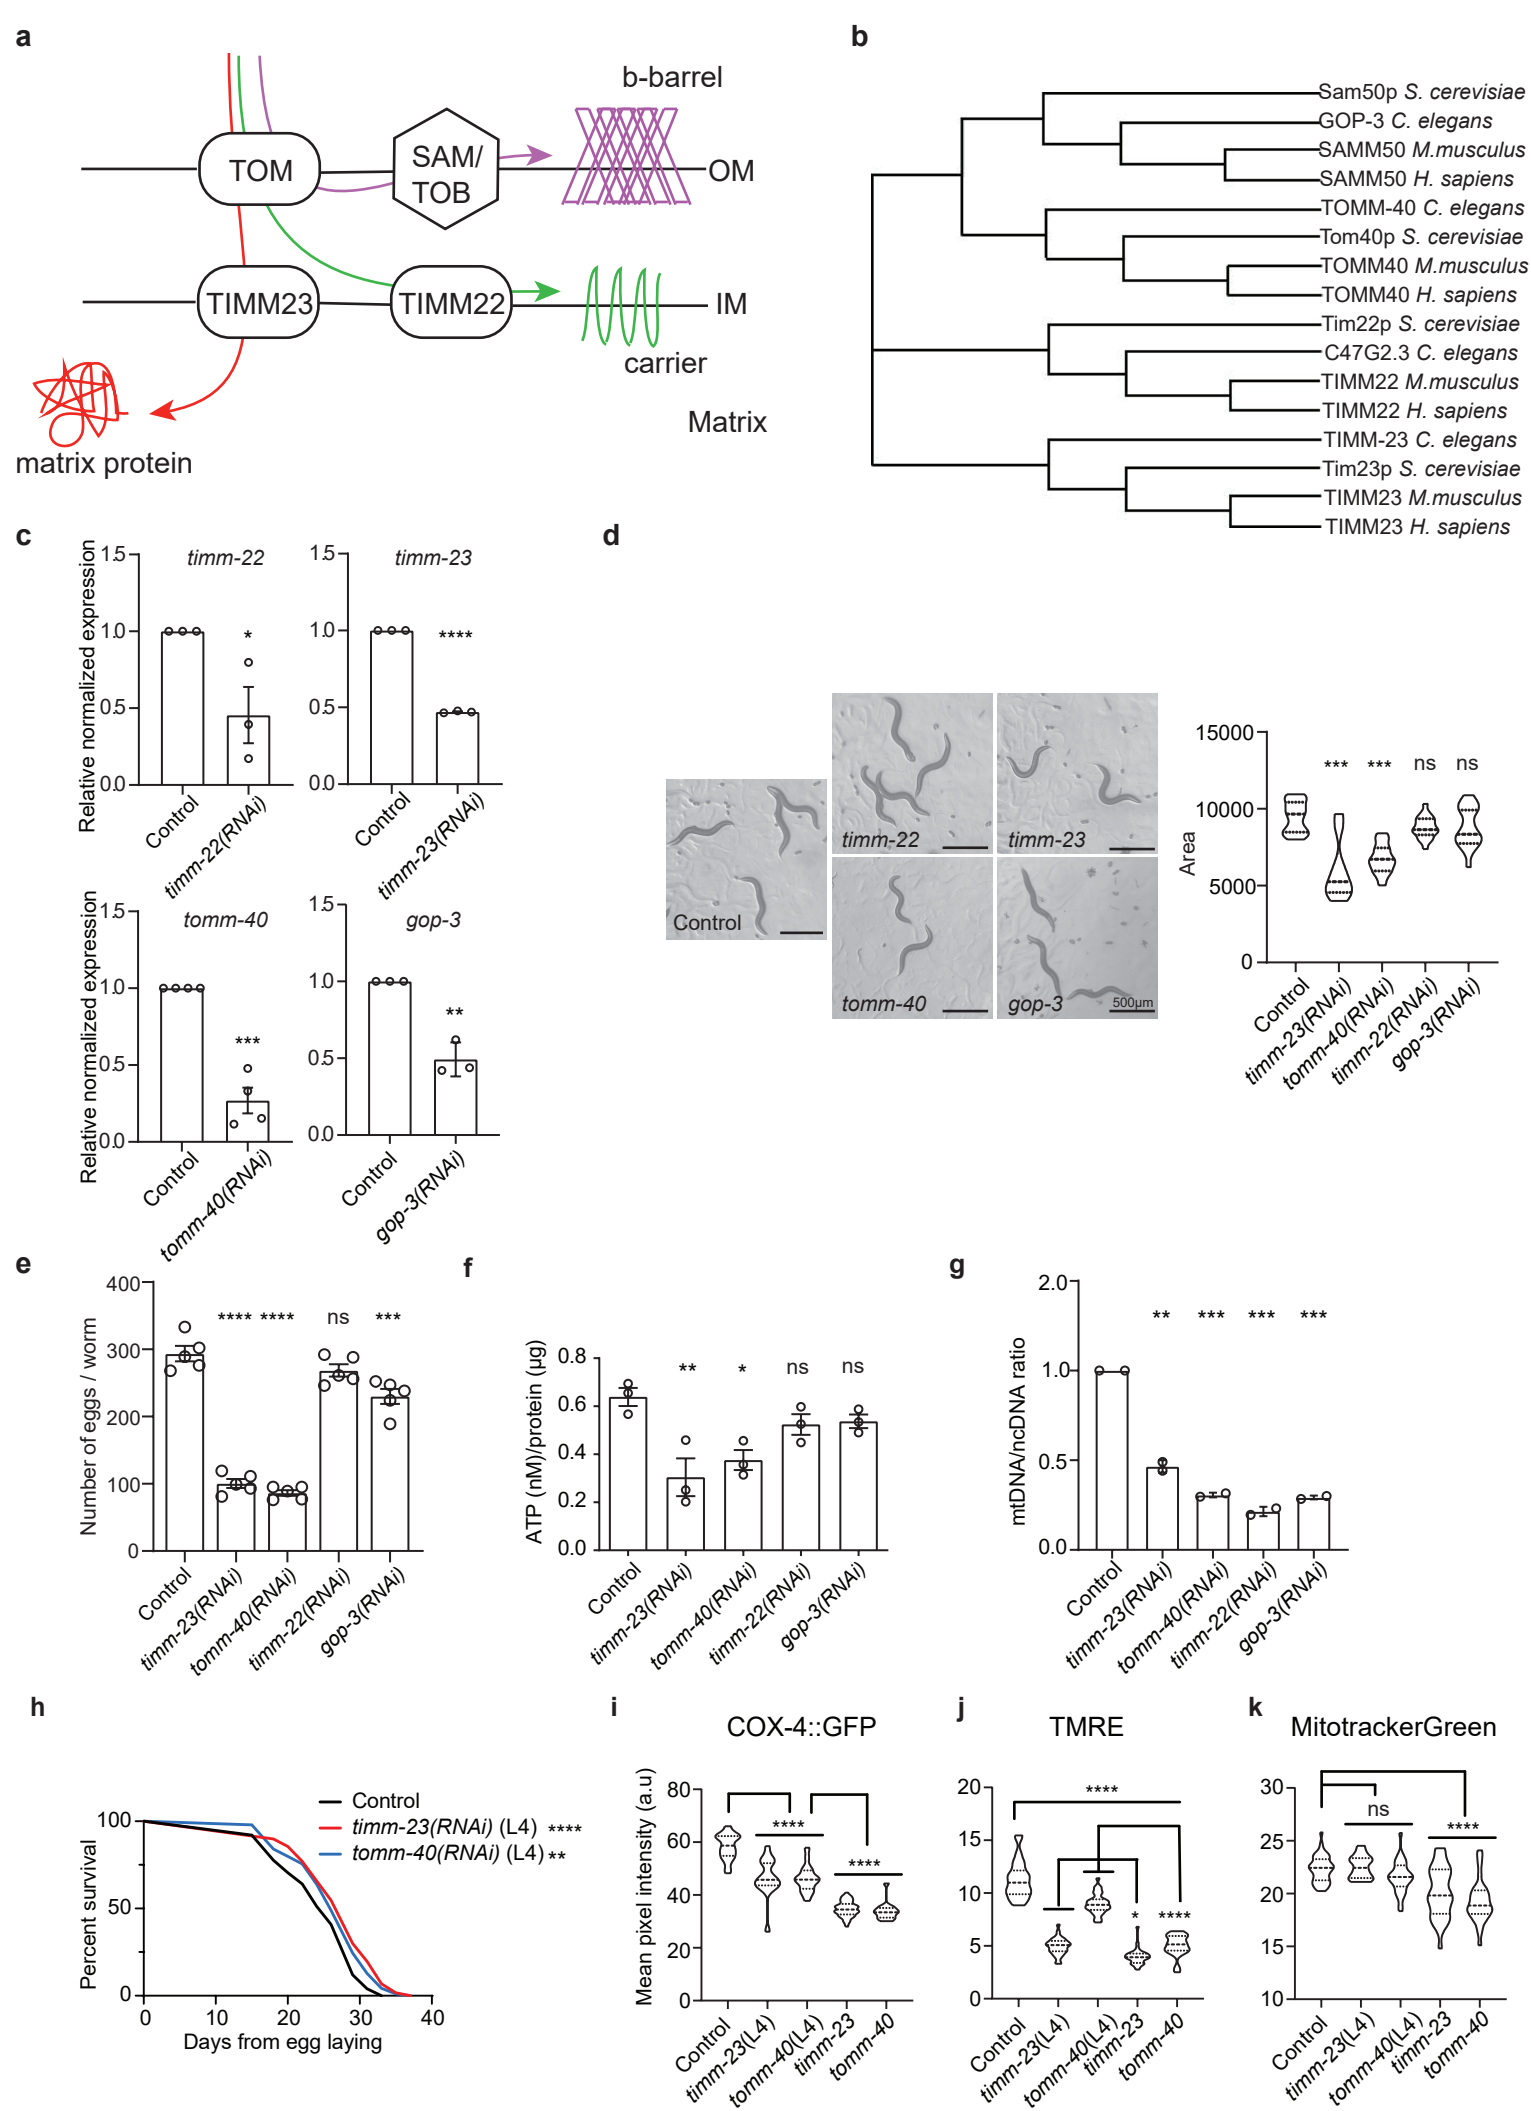

Supplementary Figure 1

1 **Supplementary Figure 1. Phenotypic characterization of animals with**  
2 **mitochondrial protein import deficiencies. a** Schematic diagram of the basic protein  
3 import routes to mitochondria. The localization and role of each translocase (TOM,  
4 TIMM23, TIMM22, TOB/SAB) is indicated. **b** Protein sequences obtained through  
5 Blast search in different species were used for the phylogenetic tree, generated in  
6 Clustal Omega (<https://www.ebi.ac.uk/Tools/msa/clustalo>). **c** Relative expression of  
7 *timm-22*, *timm-23*, *tomm-40* and *gop-3* mRNA levels upon genetic inhibition of each of  
8 them. n=3 biologically independent experiments, two-tailed *t*-test was used for  
9 comparisons. Data are presented as mean expression  $\pm$ SEM. **d** Animal body size upon  
10 genetic inhibition of *timm-22*, *timm-23*, *tomm-40* and *gop-3* with the Image J software  
11 (Area). n=3 biologically independent experiments, mean area  $\pm$ SEM One-way ANOVA  
12 with Dunnett's multiple comparison test. Exact sample size and P values are included in  
13 Source Data file. (\*\*\*\* denotes  $P < 0.0001$  and ns denotes not significant) **e** Brood size  
14 of animals treated with *timm-22*, *timm-23*, *tomm-40* and *gop-3* RNAi. n=5 biological  
15 independent experiments **f** Total ATP content per  $\mu$ g of protein of RNAi treated wt  
16 worms on their first day of adulthood. Data presented as mean values  $\pm$ SEM. n=3  
17 biologically independent, One-way ANOVA Dunnett's multiple comparison test. Exact  
18 P values are included in Source Data file (\*\* denotes  $P < 0.01$  and \* denotes  $P < 0.05$ ) **g**  
19 Quantification of the relative mtDNA copy number of animals treated with *timm-22*,  
20 *timm-23*, *tomm-40* and *gop-3* RNAi. n=2, two-tailed *t*-test was used for comparisons.  
21 Data presented as mean expression  $\pm$ SD. **h** Lifespan curves of animals treated with  
22 *timm-23* and *tomm-40* RNAi from the L4 stage. n=2 biologically independent  
23 experiments. Curves were compared with the Log-rank (Mantel-Cox) test (\*\*\*\* denotes  
24  $P < 0.0001$ , \*\* denotes  $P < 0.001$ ); detailed values are shown in Supplementary Table 2. **i-**  
25 **k** Quantified fluorescence of COX-4::GFP reporter animals (**i**), mitochondrial

26 membrane  $\Delta\psi$  (TMRE stained animals) (**j**) and total mitochondrial mass (Mitotracker  
27 Green stained animals) (**k**) upon treatment with *timm-23* and *tomm-40* RNAi from the  
28 L4 stage and from egg. n=3 biologically independent experiments. One-way ANOVA,  
29 Tukey's multiple comparisons test (\*\*\*\* denotes  $P < 0.0001$ , \* denotes  $P < 0.05$ , ns  
30 denotes not significant). Exact sample size and P values are included in Source Data  
31 file. a.u.: arbitrary units.

32

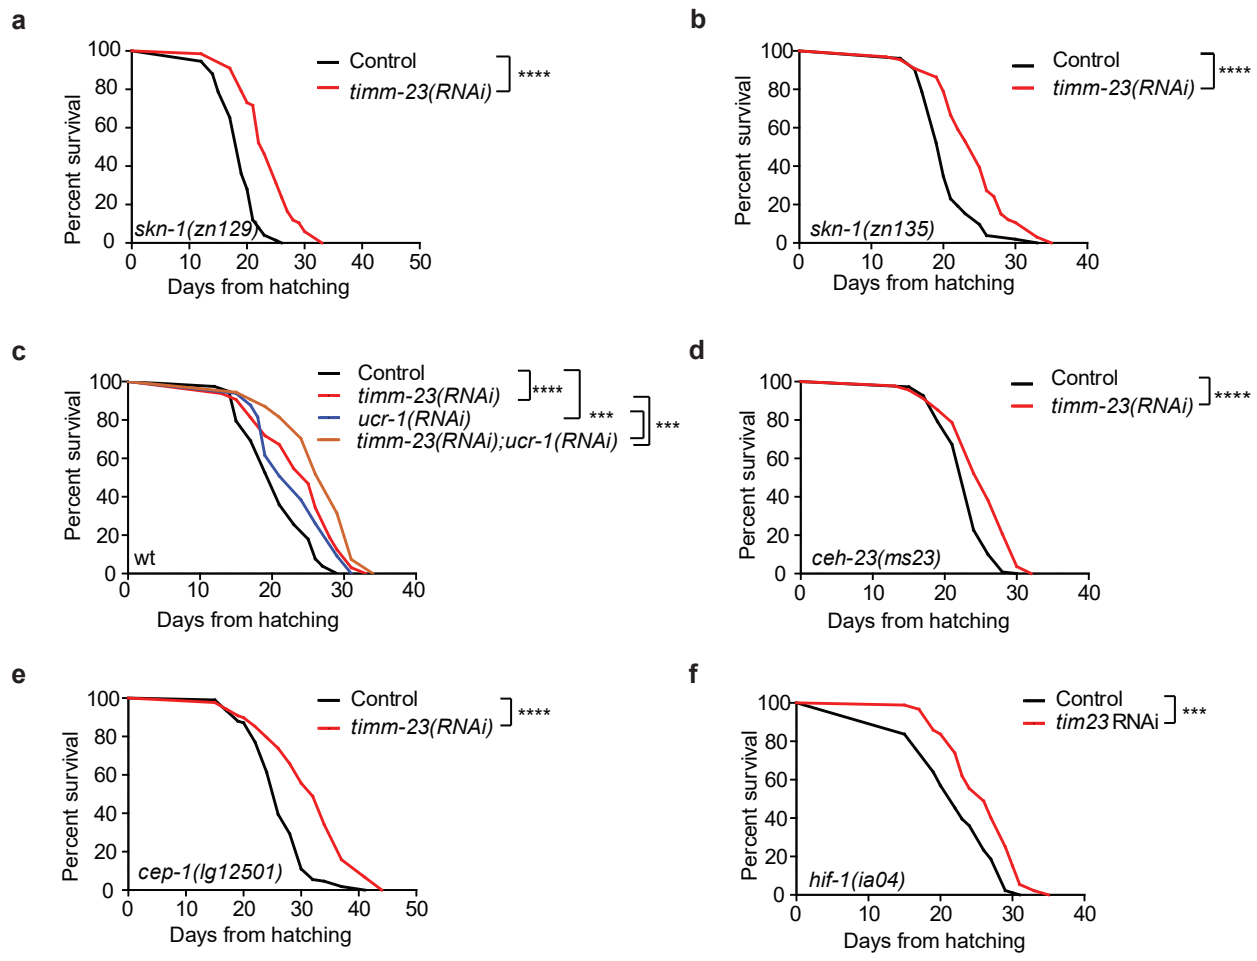

Supplementary Figure 2

33 **Supplementary Figure 2. MitoMISS extends lifespan independently of well-**  
34 **characterised longevity pathways. a-f** Lifespan curves of well-characterized longevity  
35 mutants such as *skn-1(zn129)* (a), *skn-1(zn135)* (b), *ucr-1* respiration-deficient animals  
36 (c), *ceh-23(ms23)* (d), *cep-1(lg12501)* (e), and *hif-1(ia04)* (f) upon MitoMISS are  
37 indicated. Survival curves were compared with the Log-rank (Mantel-Cox) test (\*\*  
38 denotes P<0.0001, \*\* denotes P<0.001); detailed values are shown in Supplementary  
39 Table 2.  
40  
41

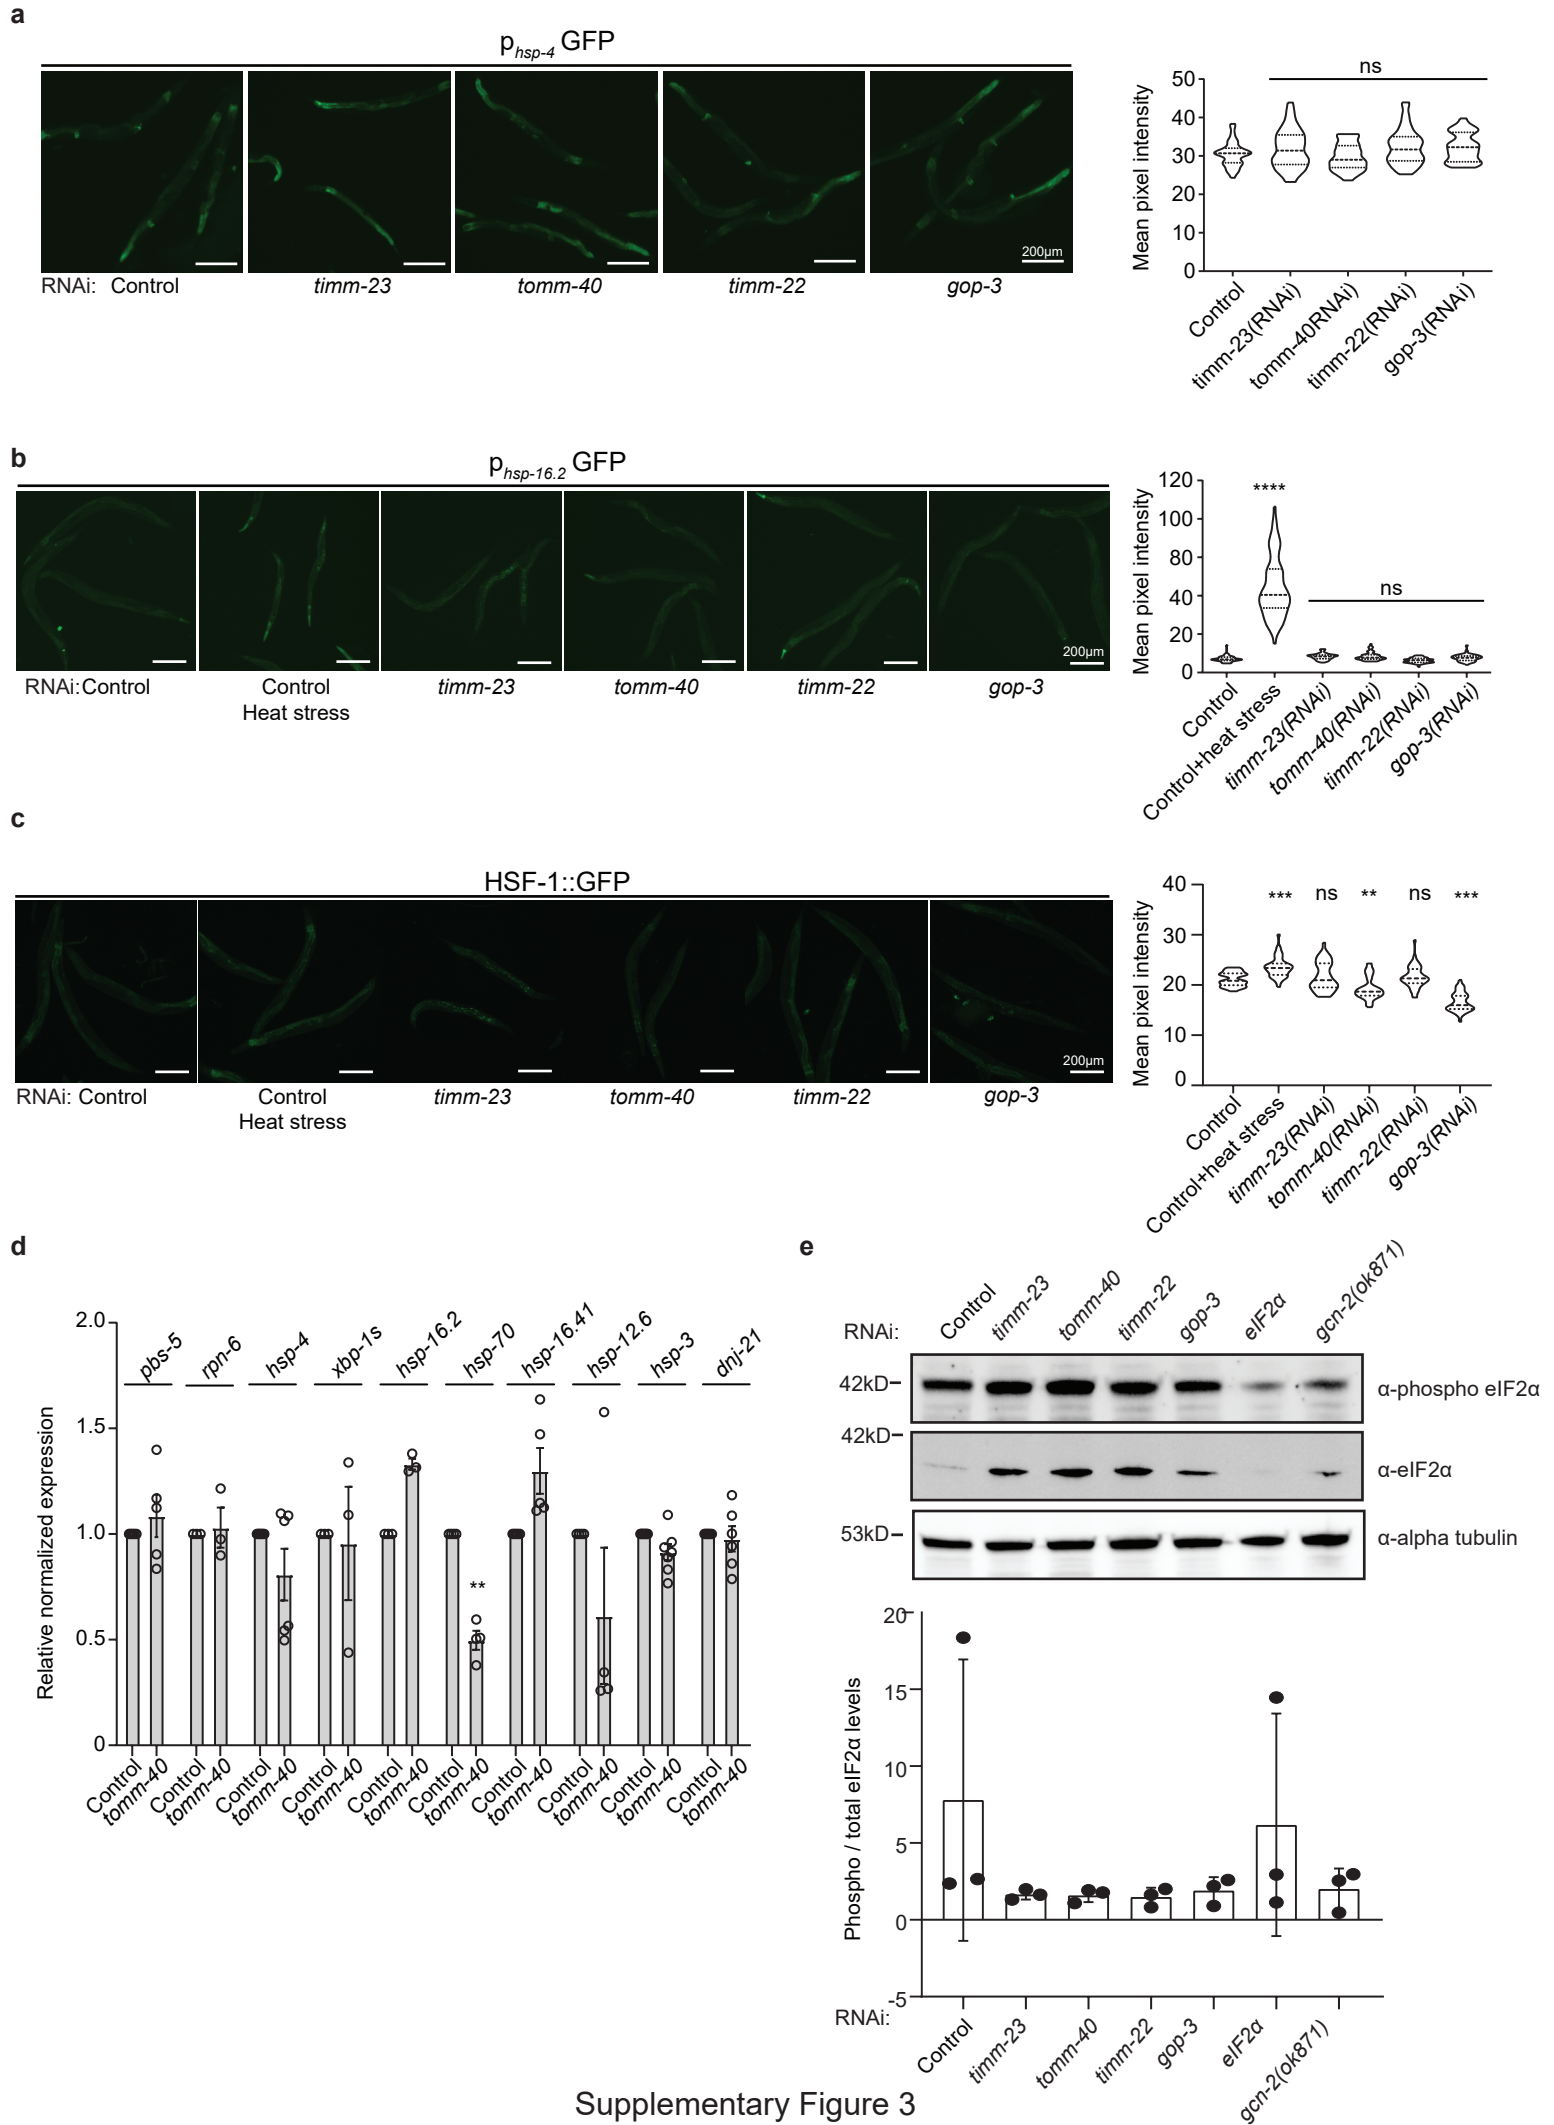

Supplementary Figure 3

42 **Supplementary Figure 3. Association of MitoMISS with various proteostatic**  
43 **networks. a-c** Epifluorescence images of *hsp-4* transcript levels (UPR<sup>ER</sup>) (**a**), *hsp-16.2*  
44 transcript levels (HSR) (**b**) and HSF-1 protein levels (**c**) upon *timmm-23*, *tomm-40*, *timmm-*  
45 *22* and *gop-3* genetic inhibition (left panels) and their corresponding quantifications  
46 depicted in violin plots (right panels), one-way ANOVA, with Dunnett's multiple  
47 comparisons test. n=3 biologically independent experiment with at least 20 worms per  
48 condition. Exact sample size and P values are included in Source Data file. a.u.:  
49 arbitrary units **d** Normalised expression levels of proteasomal (*pbs-5* and *rpn-6*), UPR<sup>ER</sup>  
50 (*hsp-4* and *xbp-1s*) and heat stress response marker genes (*hsp-16.2*, *hsp-70* (C12C8.1),  
51 *hsp-16.41*, *hsp-12.6*, *hsp-3*, *dnj-21*), relative to the housekeeping genes *pmp-3* and *act-3*  
52 (n≥3, normalised mean expression ±SEM, 2way ANOVA, with Sidak's multiple  
53 comparisons test). **e** Immunoblot analysis of the phosphorylated and the total protein  
54 levels of eIF2α upon *timmm-23*, *tomm-40*, *timmm-22* and *gop-3* genetic inhibition (\*\*\*\*  
55 denotes  $P < 0.0001$ , \*\*\* denotes  $P < 0.001$ , \*\* denotes  $P < 0.01$  and \* denotes  $P < 0.05$ ).  
56 Quantified ration of phospho/total eIF2α levels from three independent experiments  
57 (Image J software) are shown in the bar graph below as mean ±SD.  
58  
59



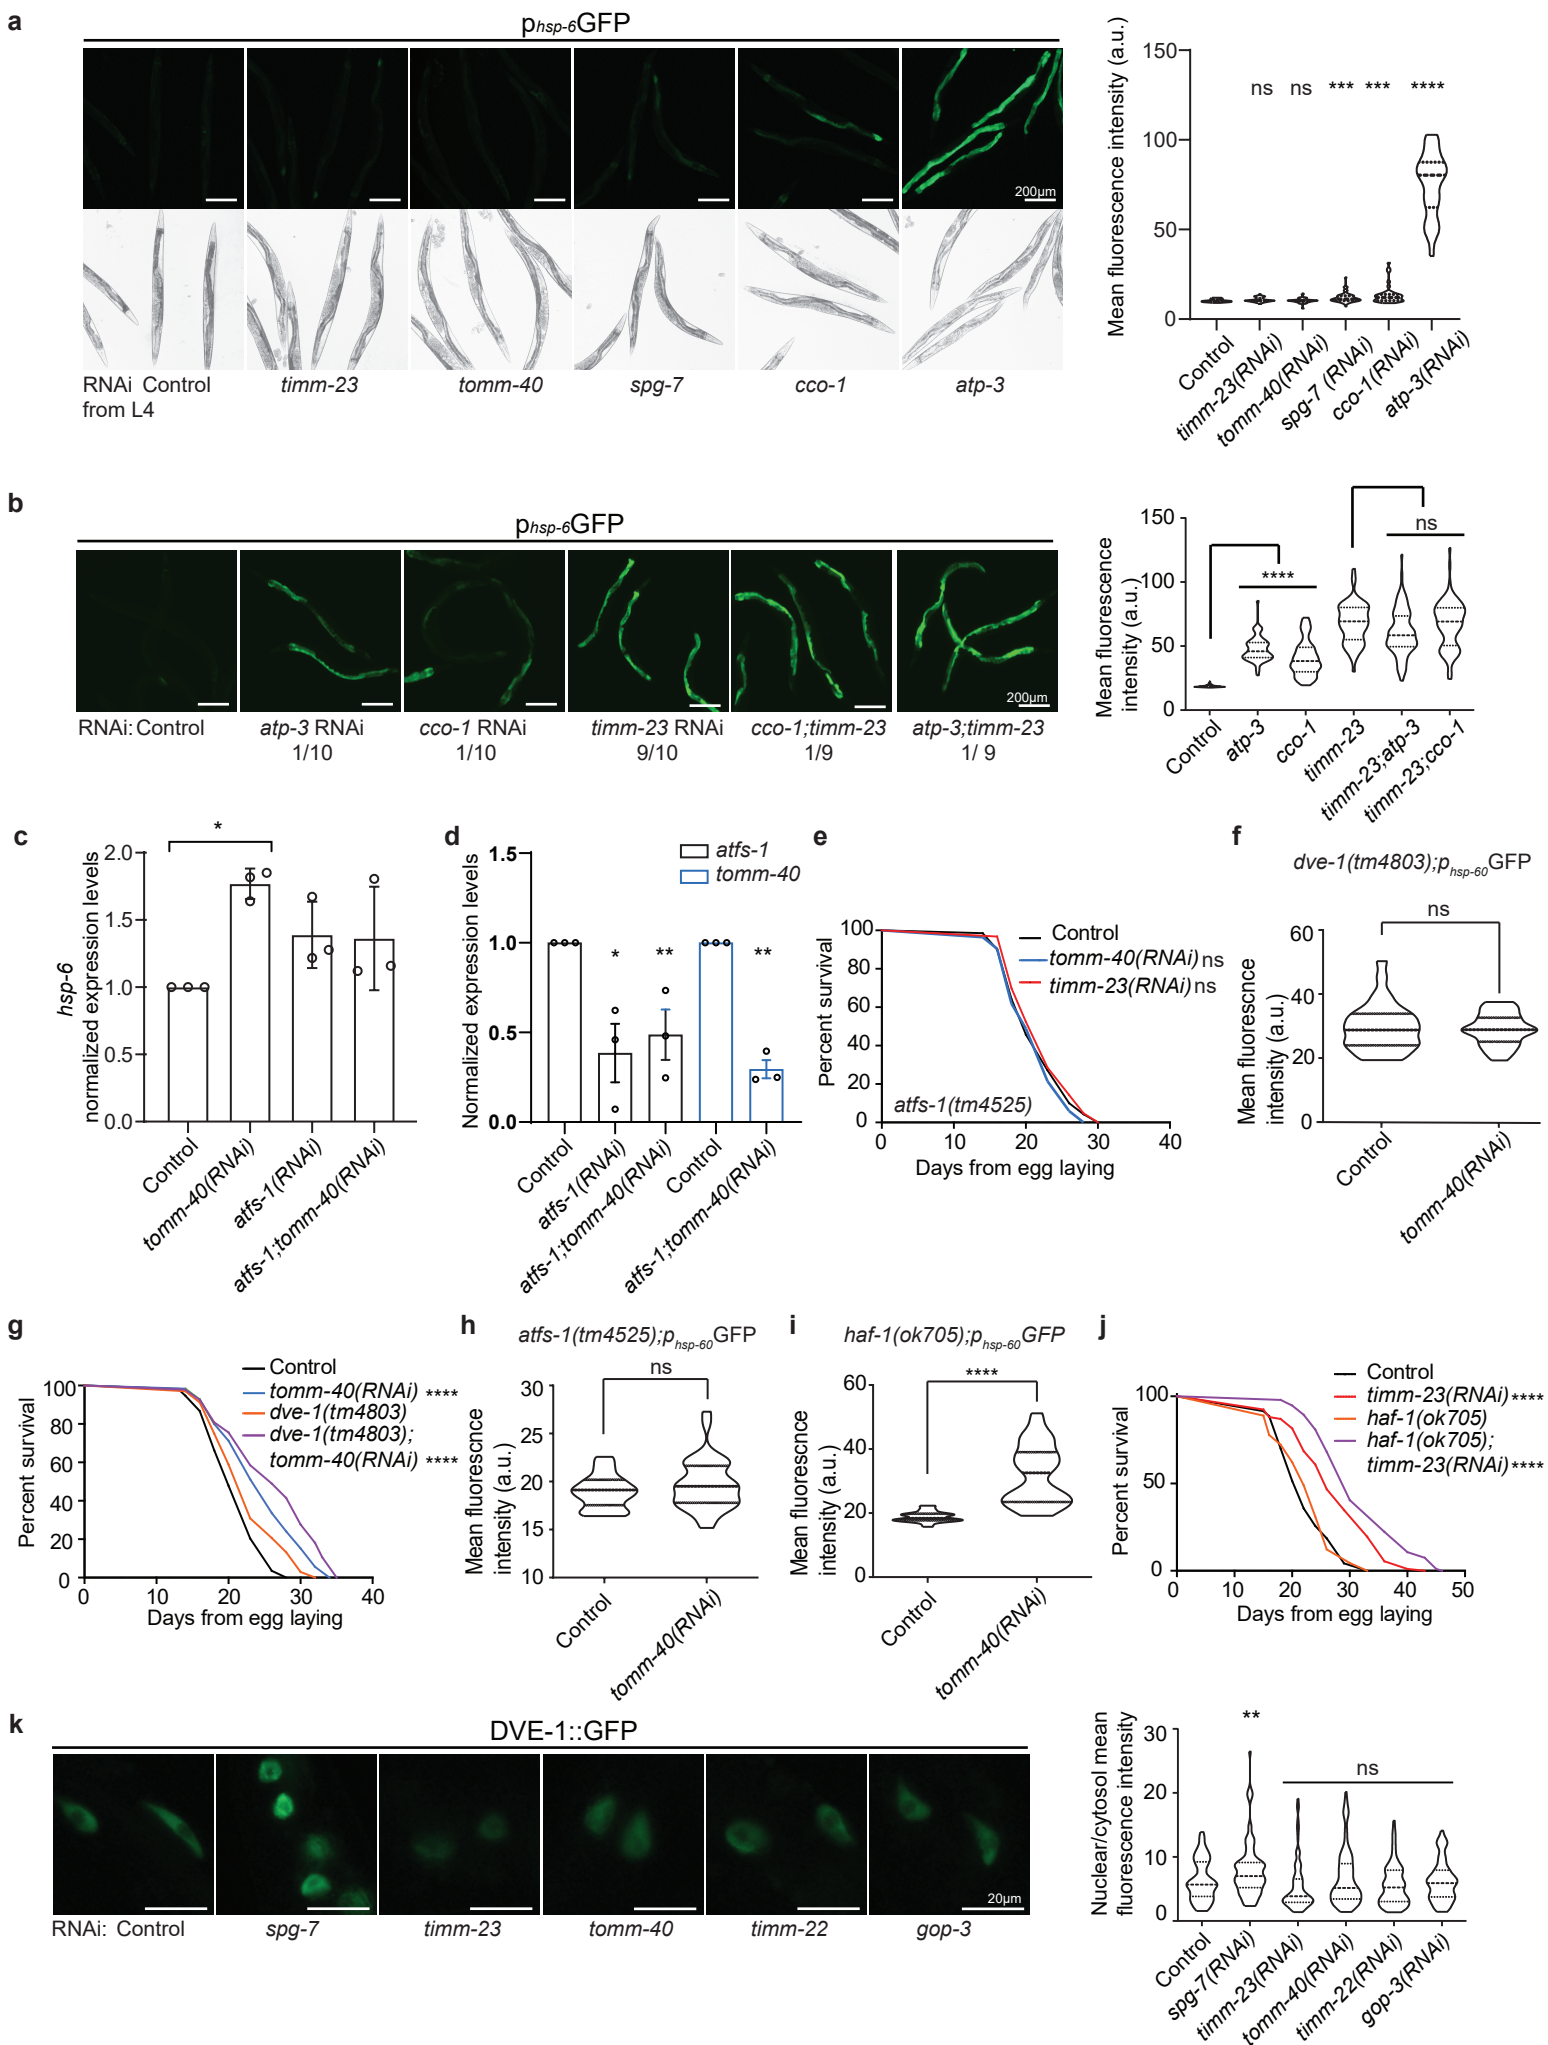

Supplementary Figure 4

60 **Supplementary Figure 4. Components of canonical UPR<sup>mt</sup> are not consistently**  
61 **activated or required for longevity upon MitoMISS. a** Epifluorescence images of  
62 *hsp-6* transcriptional reporter upon *timmm-23*, *tomm-40*, *spg-7*, *cco-1* and *atp-3* genetic  
63 inhibition performed at the L4 stage (left panel) and the corresponding quantification  
64 (right panel) n=2 biologically independent experiments with at least 20 worms per  
65 condition. Two-tailed *t*-test. Exact sample size and P values are included in Source Data  
66 file. **b** Epifluorescence images of *hsp-6* transcript levels upon 10% *cco-1* and *atp-3*,  
67 90% *timmm-23* and their combination performed from egg (left panel) and the  
68 corresponding quantification of p<sub>*hsp-6*</sub>GFP fluorescence (right panel) n=2 biologically  
69 independent experiments with at least 20 worms per condition. One-way ANOVA, with  
70 Tukey's multiple comparison test). Exact sample size and P values are included in  
71 Source Data file. **c** Relative expression of *hsp-6* mRNA in *tomm-40*, *atfs-1* and *atfs-*  
72 *1;tomm-40* RNAi treated animals. n=3 biologically independent experiments. one-way  
73 ANOVA with Dunnett's multiple comparison test **d** Relative expression of *atfs-1*  
74 mRNA in *atfs-1* and *atfs-1;tomm-40* RNAi treated animals and of *tomm-40* mRNA in  
75 *atfs-1;tomm-40* RNAi treated animals. n≥2 Data presented as normalised mean  
76 expression ±SD **e** Lifespan curves upon MitoMISS in the absence of ATFS-1. n=2  
77 biologically independent experiments with at least 20 worms per condition. **f**  
78 Fluorescence intensity of p<sub>*hsp-60*</sub>GFP transgenic worms crossed with *dve-1(tm4803)*.  
79 *tomm-40* RNAi does not increase *hsp-60* expression in the *dve-1(tm4803)* mutant  
80 background. n=3 biologically independent experiments with at least 20 worms per  
81 condition. Exact sample size and P values are included in Source Data file. **g** Survival  
82 curves of *tomm-40 RNAi* extends lifespan of the *dve-1(tm4803)* mutant. n=2  
83 biologically independent experiments. **h-i** Fluorescent intensity of p<sub>*hsp-60*</sub>GFP  
84 transgenics crossed with *atfs-1(tm4525)* (**h**) or *haf-1(ok705)* (**i**) mutants. n=2

85 biologically independent experiments with at least 20 worms per condition. Comparison  
86 with two-tailed *t*-test. Exact sample size and P values are included in Source Data file.  
87 (j) MitoMISS potently increases lifespan of *haf-1(ok705)* mutants. n=2 biologically  
88 independent experiments. k Nuclear/cytoplasmic mean fluorescent intensity of DVE-  
89 1::GFP. Two-tailed *t*-test (\*\* denotes P<0.01 and ns denotes not significant). n=2  
90 biologically independent experiments with at least 20 worms per condition. Exact  
91 sample size and P values are included in Source Data file. Survival curves were  
92 compared with the Log-rank (Mantel-Cox) test (\*\*\*) denotes P<0.0001, \*\* denotes  
93 P<0.001) ; detailed values are shown in Supplementary Table 2. a.u.: arbitrary units.  
94  
95

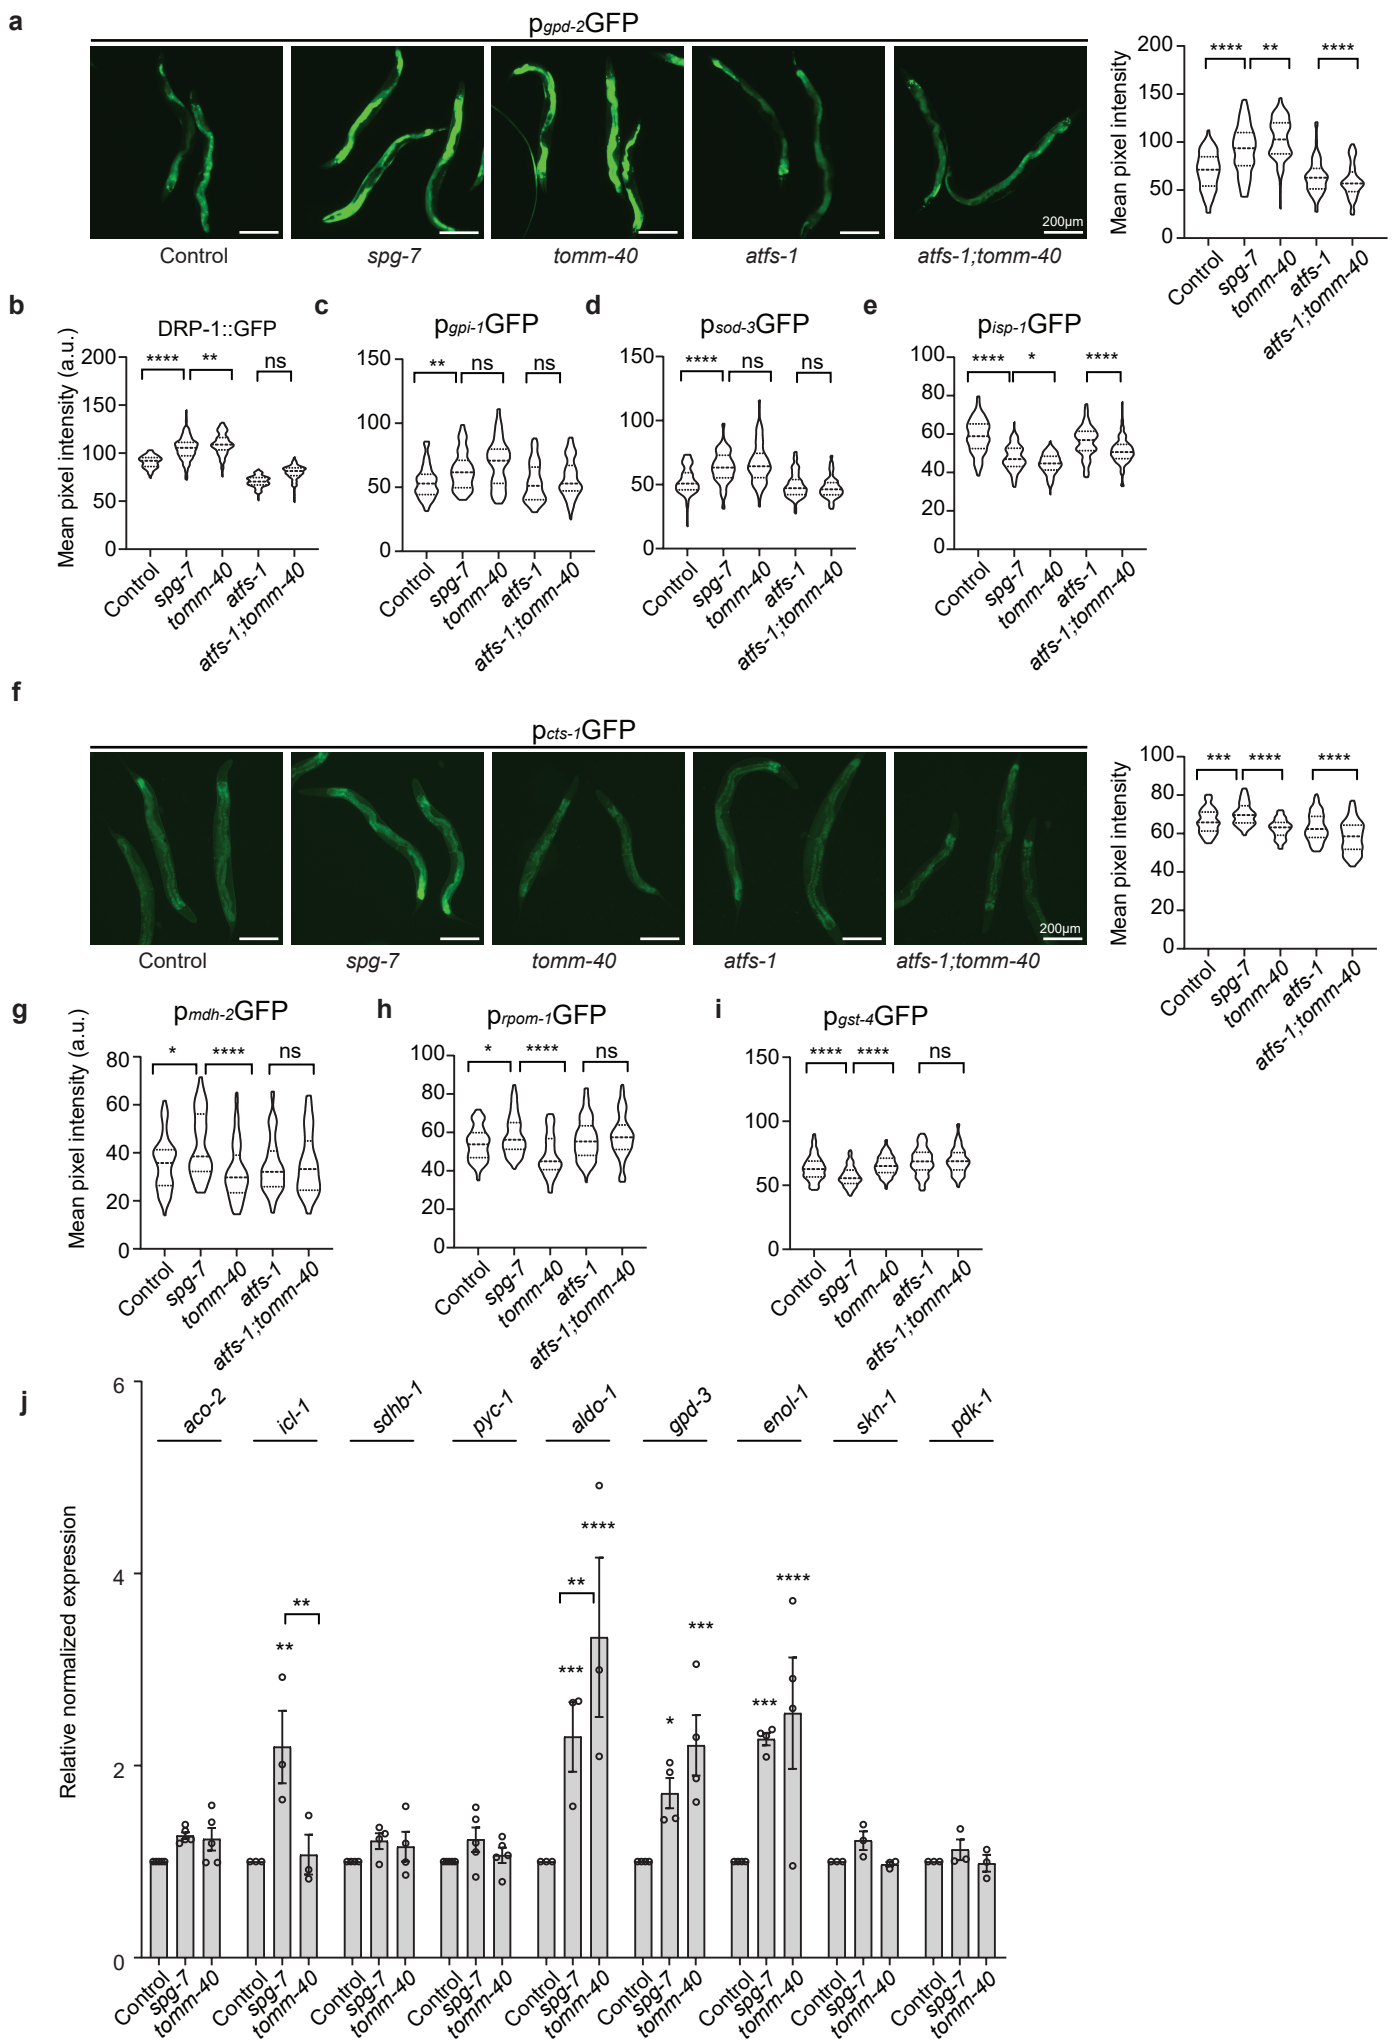

Supplementary Figure 5

96 **Supplementary Figure 5. Shared and differential expression patterns of known**  
97 **ATFS-1 target genes upon MitoMISS. a** Epifluorescence images showing the  
98 expression levels of *gpd-2* transcript, upon inhibition of *spg-7*, *tomm-40*, *atfs-1* and *atfs-*  
99 *1;tomm-40* (left panel) and the corresponding quantification (right panel). **b**  
100 Quantification of DRP-1::GFP fluorescence upon inhibition of *spg-7*, *tomm-40*, *atfs-1*  
101 and *atfs-1;tomm-40*. **c-e** Quantified fluorescence of the *gpi-1*(**c**), *sod-3* (**d**) and *isp-1* (**e**)  
102 transcriptional reporters upon inhibition of *spg-7*, *tomm-40*, *atfs-1* and *atfs-1;tomm-40*. **f**  
103 Epifluorescence images of the *cts-1* transcriptional reporter, upon inhibition of *spg-7*,  
104 *tomm-40*, *atfs-1* and *atfs-1;tomm-40* (left panel) and the corresponding quantification  
105 (right panel). **g-i** Quantified fluorescence of the *mdh-2* (**g**), *rpom-1* (**h**) and *gst-4* (**i**)  
106 transcriptional reporters upon inhibition of *spg-7*, *tomm-40*, *atfs-1* and *atfs-1;tomm-40*.  
107 Quantified fluorescence intensities are depicted in violin plots.  $N \geq 2$  biologically  
108 independent experiments of at least 20 worms per condition. One-way ANOVA, with  
109 Tukey's multiple comparisons test (\*\*\*\* denotes  $P < 0.0001$ , \*\*\* denotes  $P < 0.001$ , \*\*  
110 denotes  $P < 0.01$  and \* denotes  $P < 0.05$ ). Exact sample size and P values are included in  
111 Source Data file. a.u.: arbitrary units (**j**) Normalized expression levels of the indicated  
112 ATFS-1 targets genes, relative to the housekeeping genes *pmp-3* and *act-3* ( $n \geq 3$ ,  $\pm$ SEM,  
113 two-way ANOVA, with Sidak's multiple comparisons test).  
114  
115

**a**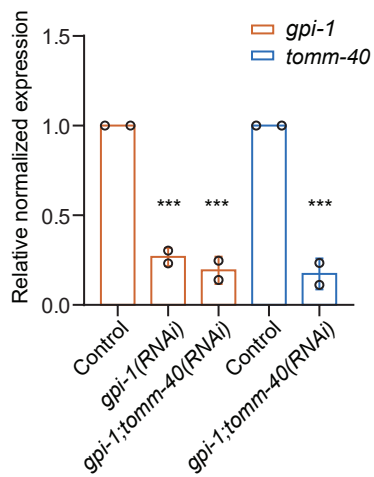**b**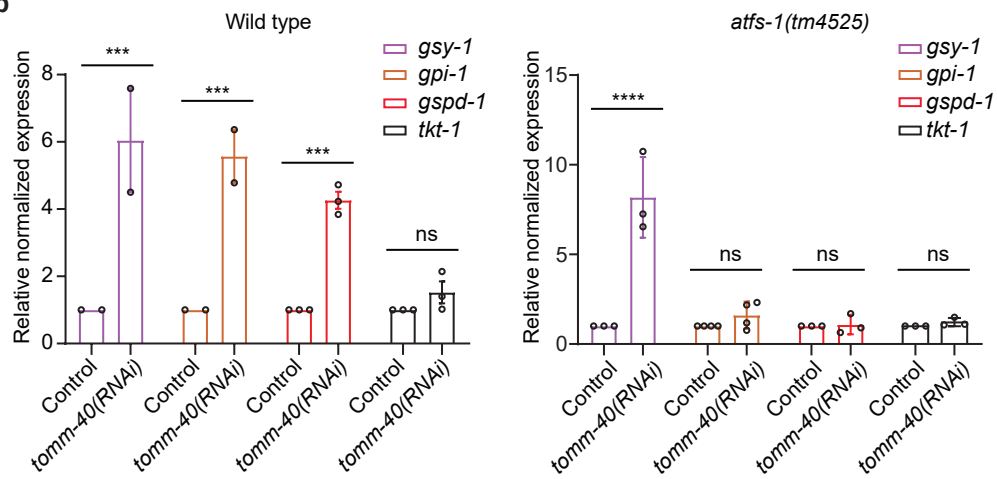**c**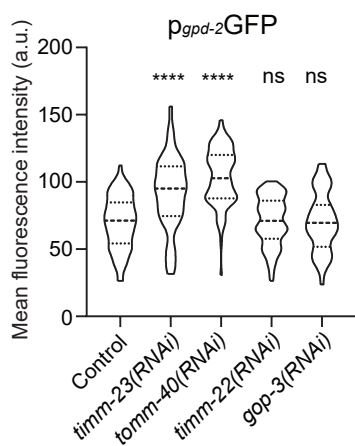**d**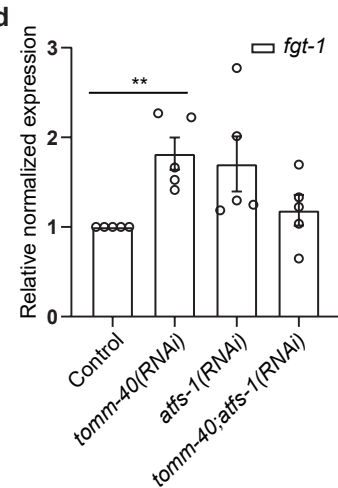**e**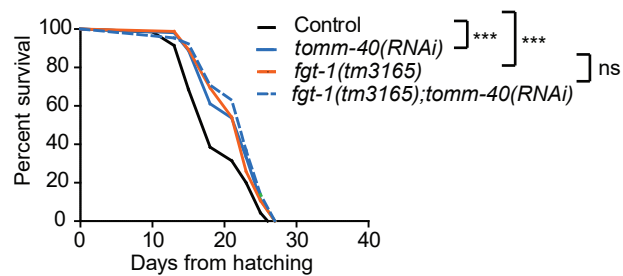

Supplementary figure 6

116 **Supplementary Figure 6. MitoMISS activates expression of genes involved in**  
117 **glucose metabolism. a** Relative expression of *gpi-1* mRNA in *gpi-1* and *gpi-1;tomm-40*  
118 RNAi treated animals and of *tomm-40* mRNA in *gpi-1;tomm-40* RNAi treated animals.  
119 **b** Relative expression of *gsy-1*(grey), *gpi-1*(green), *gspd-1*(pink) and *tkt-1*(blue) mRNA  
120 in control and *tomm-40* RNAi treated wild type animals (left panel) and *atfs-1* mutants  
121 (right panel). Expression levels were normalized to housekeeping genes *act-3* and *pmp-*  
122 *3*. N=2 biologically independent experiments. Mean expression  $\pm$ SD. Two-way  
123 ANOVA Sidak's multiple comparisons test. **c** Expression levels of the glycolysis  
124 transcriptional reporter, *gpd-2*, upon MitoMISS, *timmm-22* and *gop-3* inhibition, n=3  
125 biologically independent experiments (one-way ANOVA, with Tukey's multiple  
126 comparisons test. Exact sample size and P values in Source Data file **d** Relative  
127 expression of *fgt-1* mRNA in *tomm-40*, *atfs-1* and *atfs-1;tomm-40* RNAi treated  
128 animals. n=5 biological independent experiments. Mean expression  $\pm$ SEM.  
129 Comparisons with two-tailed *t*-test. **e** Lifespan of wt or *fgt-1(tm3165)* mutants upon  
130 MitoMISS. n=2 biological independent experiments. Statistical analysis of survival  
131 curves was performed with the Log-rank (Mantel-Cox) test (\*\*\*) denotes  $P < 0.0001$ , \*\*  
132 denotes  $P < 0.001$  and \* denotes  $P < 0.01$ ); detailed values are shown in Table S2. a.u.:  
133 arbitrary units.  
134  
135

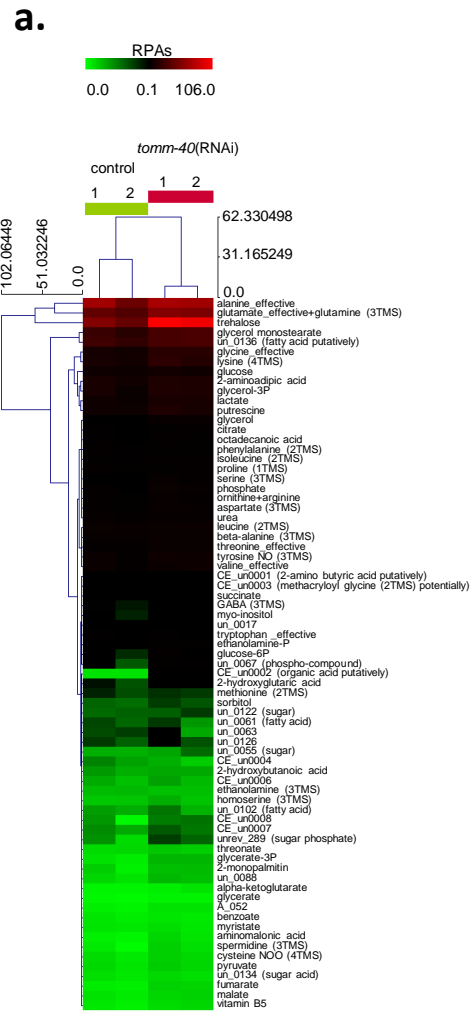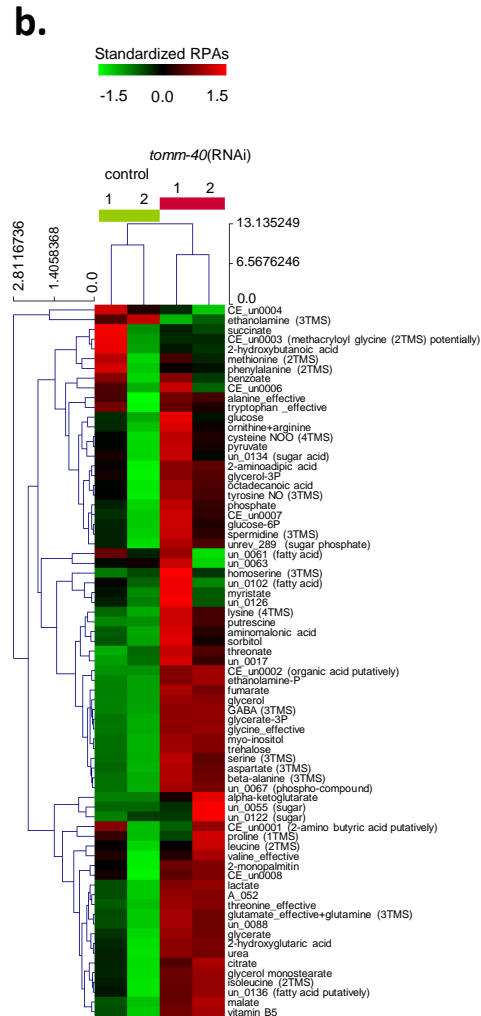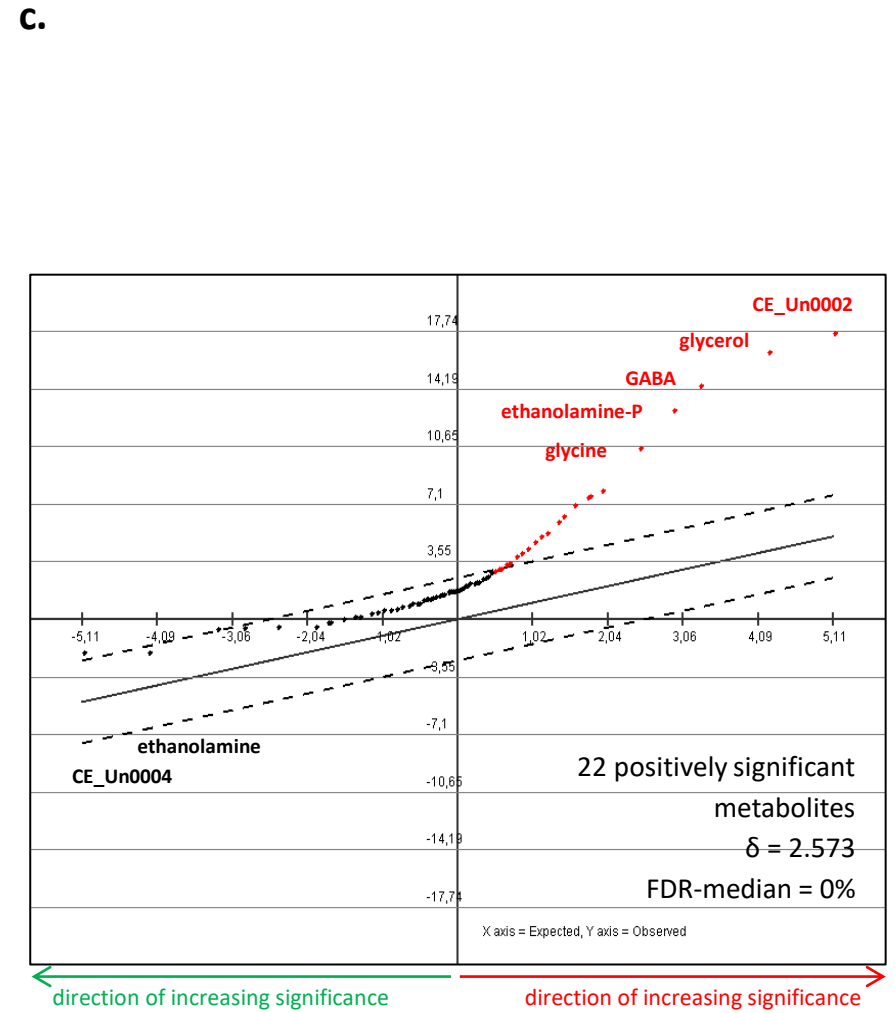

Supplementary Figure 7



136 **Supplementary Figure 7: Metabolic profiling of control and MitoMISS animals-**  
137 **Collection time 1 (CT1). a** Hierarchical clustering analysis of the normalized  
138 metabolomic dataset for collection time 1 (CT1) based on Euclidean distance (median  
139 RPA = 1.27). It depicts the difference in the abundance between the various metabolites  
140 with trehalose being among the most abundant with a clear increase in the *tomm-40*  
141 RNAi worms compared to the controls; **b** Hierarchical clustering analysis of the  
142 standardized metabolic profiles for collection time 1 (CT1) based on Euclidean distance.  
143 The metabolites of differential abundance between the control and *tomm-40* RNAi  
144 worms are apparent; **c** The SAM curve of the metabolic profile data of the *tomm-40*  
145 RNAi worms (Group B) compared to the controls (Group A). Each point corresponds to  
146 a particular metabolite; axes correspond to the observed (y axis) and the expected (x  
147 axis) values calculated by the method for each metabolite. The expected value concerns  
148 the case in which the difference in a metabolite abundance between the two groups  
149 would have been based on random error. The dashed lines define the smallest threshold  
150 of significance  $\delta$  for which FDR (median) is equal to zero. If the difference between the  
151 measured and the expected value for a metabolite abundance is in absolute value larger  
152 than  $\delta$ , then if positive or negative, this metabolite is, respectively, identified of  
153 significantly higher (red) or lower (green) abundance in the B compared to the A group.  
154 The further a significant metabolite is from the origin (0,0), the higher the statistical  
155 significance of the metabolite. The full list of positive, significant metabolites are  
156 shown in Supplementary Table 3 and their abundance is also depicted in the heat map of  
157 Fig. 5a and b. Here indicated are the 8 positively significant metabolites exhibiting the  
158 largest difference in Group B vs A and the two exhibiting the largest decrease in Group  
159 B vs A, which is, however, not identified as significant in the context of the overall

160 increase in the total 73 metabolite abundance (positive intercept with y axis) in tomm40  
161 RNAi worms compared to the controls.

162

163

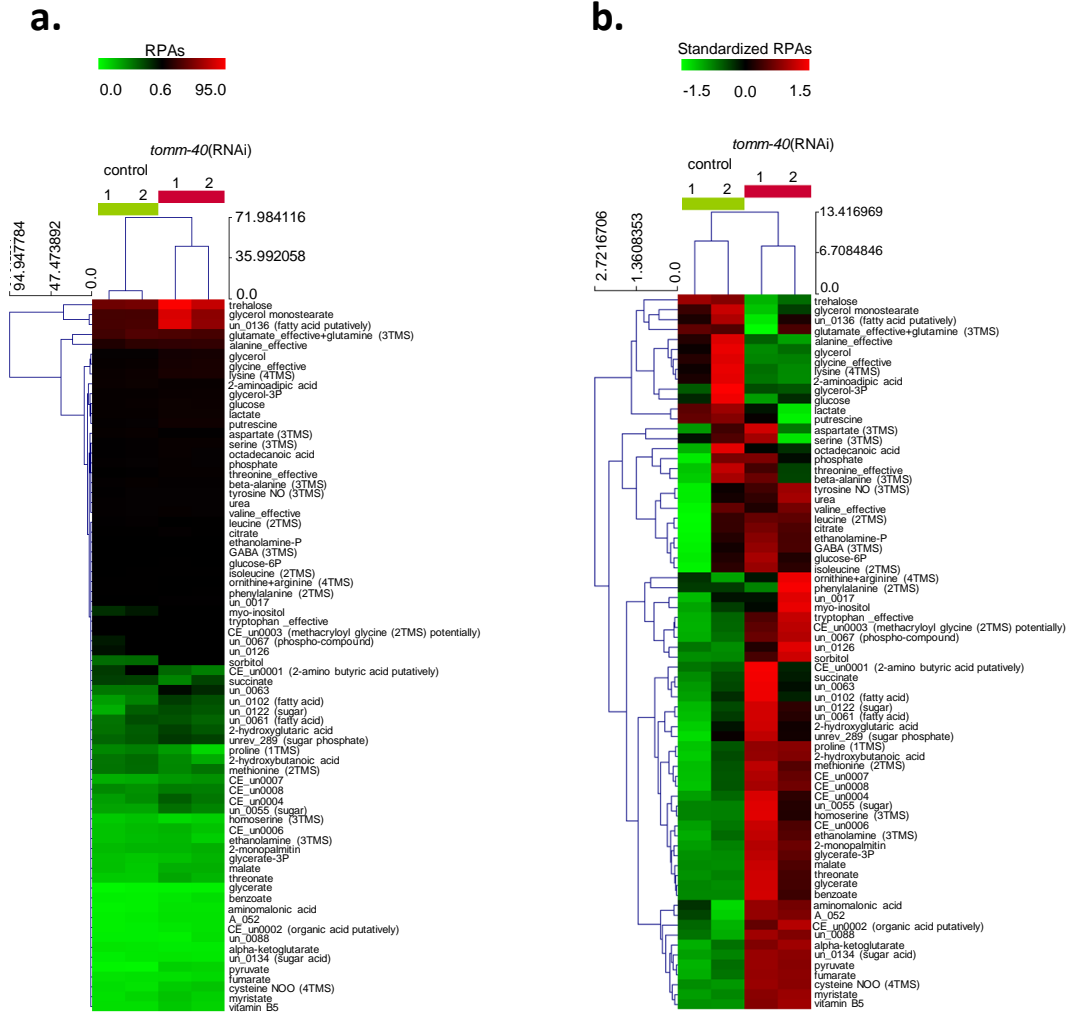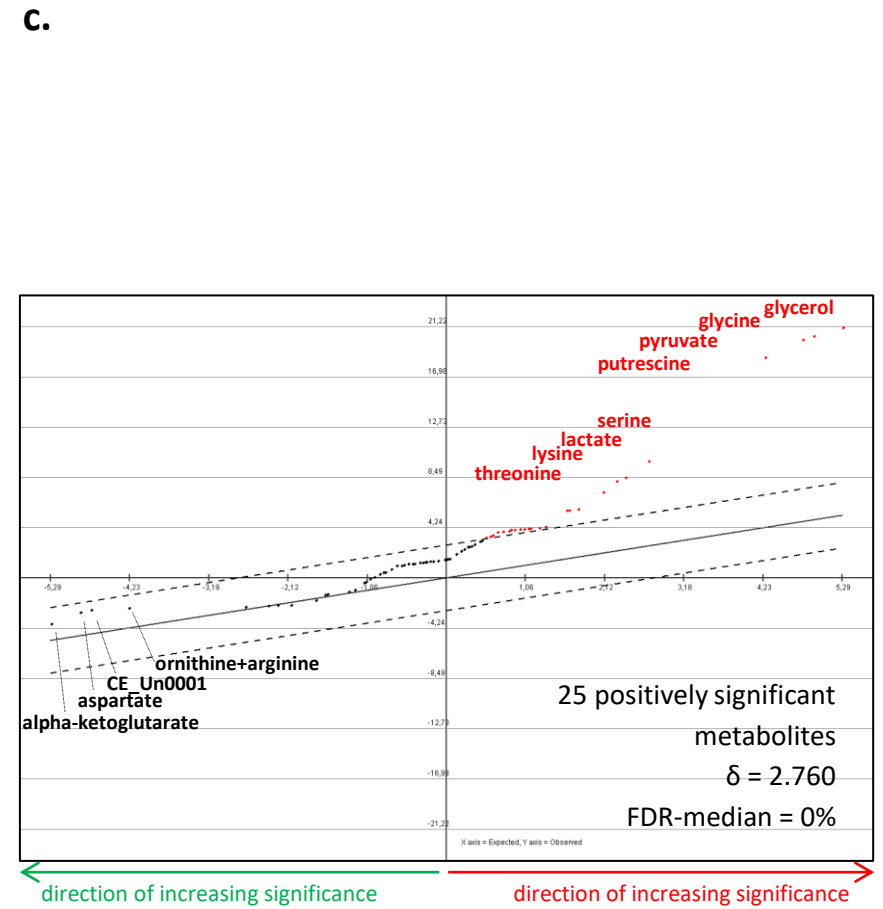

Supplementary Figure 8

164 **Supplementary Figure 8: Metabolic profiling of control and MitoMISS animals-**  
165 **Collection time 2 (CT2). a** Hierarchical clustering analysis of the normalized  
166 metabolomic dataset for collection time 2 (CT2) based on Euclidean distance (median  
167 RPA = 0.6). It depicts the difference in the abundance between the various metabolites  
168 with trehalose being the most abundant and with a clear increase in the *tomm-40* RNAi  
169 worms compared to the controls; **b** Hierarchical clustering analysis of the standardized  
170 metabolic profiles for collection time 2 (CT2) based on Euclidean distance. The  
171 metabolites of differential abundance between the control and *tomm-40* RNAi worms  
172 are apparent; **c** The SAM curve of the metabolic profile data of the *tomm-40* RNAi  
173 worms (Group B) compared to the controls (Group A). Details of the graph are as  
174 described in Supplementary Table 3. The full list of positively significant metabolites  
175 are shown in Supplementary Table 3 and their abundance is also depicted in the heat  
176 map of Figure 5a and b. Here indicated are the 8 positively significant metabolites  
177 exhibiting the largest difference in Group B vs. A, and the four exhibiting the largest  
178 decrease in Group B vs. A, but are not identified as significant in the context of the  
179 overall increase in the total 72 metabolite abundance (positive intercept with y axis) in  
180 *tomm-40* RNAi worms compared to the controls.

181

182

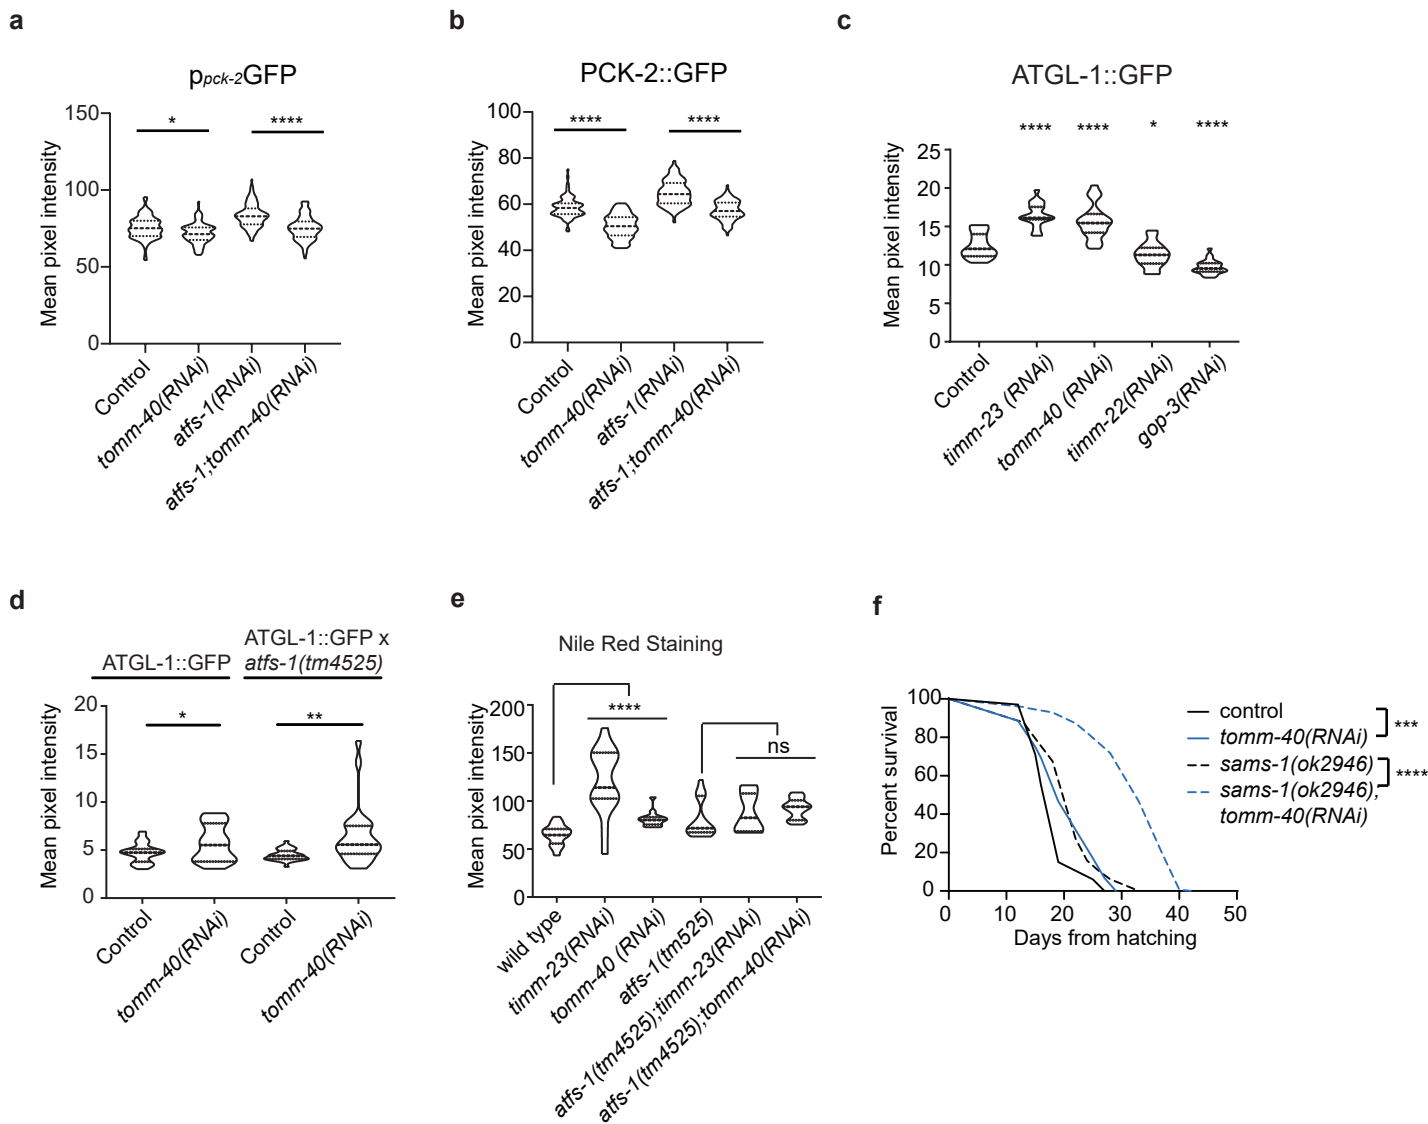

Supplementary figure 9

183 **Supplementary Figure 9. MitoMISS induces fat mobilization and extends lifespan**  
184 **of *sams-1* mutants. a** Fluorescence intensity of *pck-2* transcriptional reporter or **b**  
185 translationa reporter under control, *tomm-40*, *atfs-1* and *atfs-1;tomm-40* RNAi. n=3  
186 biologically independent experiments with at least 20 worms per condition. One-way  
187 ANOVA with Tukey's multiple comparisons test. Exact sample size and P values in  
188 Source data file. **c** Fluorescence intensity of the translation reporter worms VS20  
189 expressing full length ATGL-1 under its endogenous promoter, treated with the  
190 indicated RNAi constructs from hatching until day 1 of adulthood. n=3 biologically  
191 independent experiments with at least 20 worms per condition. Two-tailed *t*- test. Exact  
192 sample size and P values in Source data file. **d** VS20 worms crossed with *atfs-*  
193 *1(tm4525)* mutants and treated with the indicated RNAi constructs from hatching until  
194 day 1. n=3 biologically independent experiments with at least 20 worms per condition.  
195 Two-tailed *t*- test. Exact sample size and P values in Source data file. **e** Total  
196 fluorescence intensity of wild type worms treated with the indicated RNAi constructs  
197 from hatching until L4 and dyed after fixation with the lipid-specific dye Nile Red. n=3  
198 biologically independent experiments with at least 10 worms per condition. Two-tailed  
199 *t*- test. Exact sample size and P values in Source data file. a.u.: arbitrary units **f** Lifespan  
200 analysis of *sams-1(ok2946)* mutant animals upon MitoMISS. n=2 biological  
201 independent experiments. Survival curves were compared with the Log-rank (Mantel-  
202 Cox) test (\*\*\*\* denotes  $P < 0.0001$ ) ; detailed values are shown in Supplementary Table  
203 2. a.u. : arbitrary units .

204

205

a

PHGDH-1::GFP

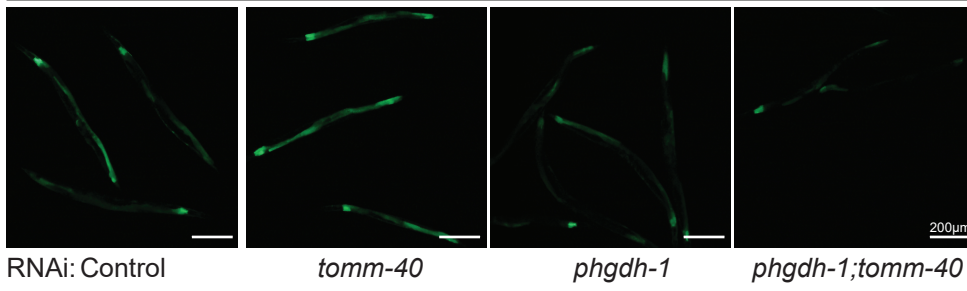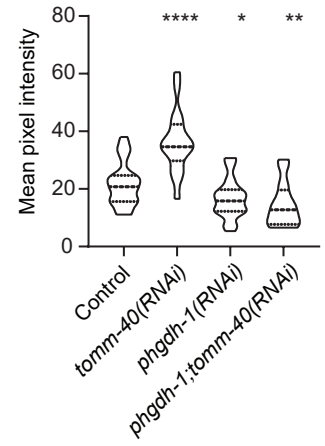

b

COX-4::GFP

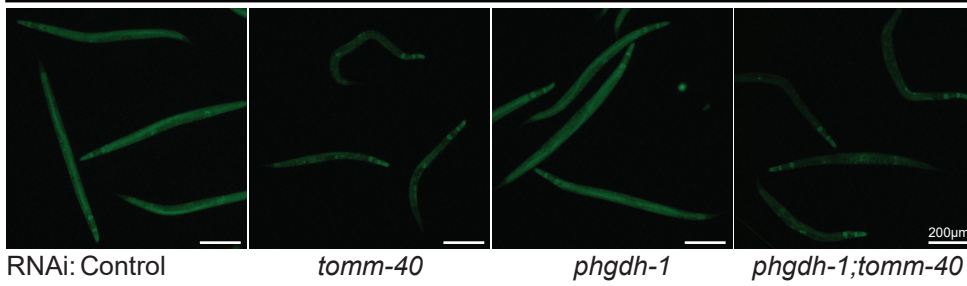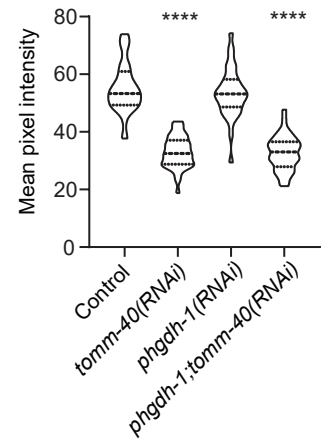

c

TMRE

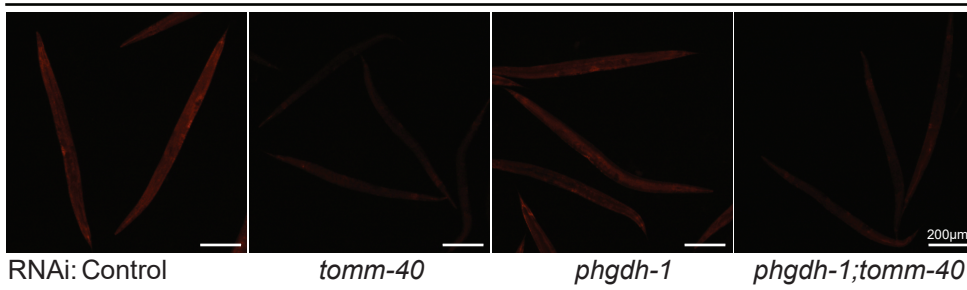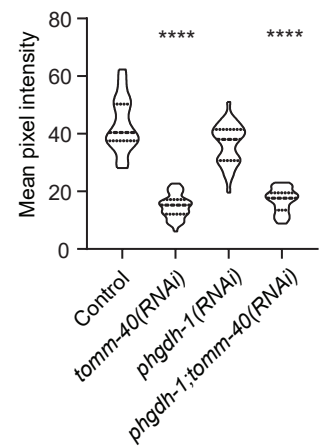

206 **Supplementary Figure 10. Inhibition of PHGDH-1 does not affect mitochondrial**  
207 **abundance and function. a-c** Fluorescence intensity of *phgdh-1* translational reporter  
208 **(a)**, COX-4::GFP reporter **(b)** or TMRE stained wild type worms **(c)** treated with  
209 control, *tomm-40*, *phgdh-1* and *phgdh-1;tomm-40* RNAi. Fluorescent intensity of  
210 different samples was compared to that of the control sample with one-way ANOVA  
211 with Dunnett's multiple comparison. n=3 biological independent experiments with at  
212 least 15 worms per condition. Exact sample size and P values in Source Data file(\*\*\*\*  
213 denotes  $P<0.0001$ , \*\*\* denotes  $P<0.001$  and \*\* denotes  $P<0.01$ ). a.u.: arbitrary units  
214



**Supplementary Table 1:** Summary of oligonucleotides used in the present study.

| Gene                                         | Sequence                          | Enzymes for subcloning | Target vector |
|----------------------------------------------|-----------------------------------|------------------------|---------------|
| <i>timmm-22</i> RNAi Forward                 | ATGGCGCTGGCCTCCTCAAATG            | HindIII-XbaI           | pL4440        |
| <i>timmm-22</i> RNAi Reverse                 | ACCGGTGGTCTCTCATATAATGATCAATAATTG | HindIII-XbaI           | pL4440        |
| <i>timmm-23</i> RNAi Forward                 | ATGGGTTGGTTCCGATTC                | HindIII-NotI           | pL4440        |
| <i>timmm-23</i> RNAi Reverse                 | CACTGTCAGTTTGTGTTACCA             | HindIII-NotI           | pL4440        |
| <i>tomm-40</i> RNAi Forward                  | ATGGCGACACCAACAGAAAGTGAG          | EcoRI                  | pL4440        |
| <i>tomm-40</i> RNAi Reverse                  | ACCGGTGGACCAATGATAAGTCCG          | EcoRI                  | pL4440        |
| <i>gop-3</i> RNAi Forward                    | ATGTCTGAAAAGACGTTCCACAAG          | BamHI-NotI             | pL4440        |
| <i>gop-3</i> RNAi Reverse                    | CTACAAGAAGTTGACACCAGCTCC          | BamHI-NotI             | pL4440        |
| <i>atfs-1</i> RNAi Forward                   | ATGTTTTCCCGTGTGGGACG              | KpnI-XbaI              | pL4440        |
| <i>atfs-1</i> RNAi Reverse                   | TCATCGAGTTGATCTCACGCTTTAG         | KpnI-XbaI              | pL4440        |
| <i>gpi-1</i> RNAi Forward                    | CCATGTCTCTGTCTCAAGACGCC           | KpnI-ApaI              | pL4440        |
| <i>gpi-1</i> RNAi Reverse                    | GAAATCTACCTGATGATGCAATCCC         | KpnI-ApaI              | pL4440        |
| <i>phgdh-1</i> RNAi Forward                  | ATGAGCGCCCAATCAACAAAGTC           | KpnI-ApaI              | pL4440        |
| <i>phgdh-1</i> RNAi Reverse                  | GTTGAGCACCTCTCGTGC GTTCAAAA       | KpnI-ApaI              | pL4440        |
| <i>dve-1</i> RNAi Forward                    | GAGCTCATGTTCCCAATGAGGG            | XbaI-SpeI              | pL4440        |
| <i>dve-1</i> RNAi Reverse                    | GAGCTCGAAAACCTTCTGCTCAAG          | XbaI-SpeI              | pL4440        |
| <i>fgt-1</i> promoter Forward                | TCTCCAAGTCTCATGGTGCATC            | BamHI-AgeI             | pPD96.75      |
| <i>fgt-1</i> promoter Reverse                | ACCGGTGACGGAATCTAAGTAGTATTAGTGGGG | BamHI-AgeI             | pPD96.75      |
| <i>hsp-60</i> RNAi Forward                   | CTTCCGCACGATCATTCTTG              | EcoRI                  | pL4440        |
| <i>hsp-60</i> RNAi Reverse                   | GGTTCACGATCTCTGGCTG               | EcoRI                  | pL4440        |
| <i>phgdh-1</i> promoter Forward              | CTAGATTCCACCAAATTGGCAGATTGC       | BamHI-AgeI             | pPD96.75      |
| <i>phgdh-1</i> coding region Reverse no stop | CCCGGGGGTTGAGCACCTCTCG            | BamHI-AgeI             | pPD96.75      |
| <i>Glifon4000</i> Forward                    | GGATCCATGGTGAGCAAGGGCGAGGAGCT     | BamHI-EcoRI            | pPD96.75      |
| <i>Glifon4000</i> Reverse                    | GAATCCGAATTACTTGTACAGCTCGTCCATGC  | BamHI-EcoRI            | pPD96.75      |
| <i>spg-7</i> RNAi Forward                    | CCAGGAGGATGGCAACAAATTG            |                        | pL4440        |
| <i>spg-7</i> RNAi Reverse                    | AGAGTGCATATCCGCCGCCA              |                        | pL4440        |
| <i>atp-3</i> RNAi Forward                    | AGAACAAGCTCGACCAGATTTT            |                        | pL4440        |
| <i>atp-3</i> RNAi Reverse                    | GGGCATCCTTGTATTTCTTGAC            |                        | pL4440        |
| <i>cco-1</i> RNAi Forward                    | GATGGCTCAACTTGCTAAGACG            |                        | pL4440        |
| <i>cco-1</i> RNAi Reverse                    | CATCTCTTTGGATCTCCTTTGC            |                        | pL4440        |
| <i>act-3</i> RT Forward                      | ATCCGTAAGGACTTGTACGCCAAC          | -                      | For qPCR      |
| <i>act-3</i> RT Reverse                      | CGATGATCTTGATCTTCATGGTTC          | -                      | For qPCR      |
| <i>pmp-3</i> RT Forward                      | CTTGCTGGAGTCACTCATCGTGTATG        | -                      | For qPCR      |
| <i>pmp-3</i> RT Reverse                      | GTCGGGACGCTGATTTATCATCTTC         | -                      | For qPCR      |
| <i>timmm-23</i> RT Forward                   | GATTCGATGCTCCAGCGCC               | -                      | For qPCR      |
| <i>timmm-23</i> RT Reverse                   | TGAGGGATCCATCTGCACATAG            | -                      | For qPCR      |
| <i>tomm-40</i> RT Forward                    | CAAGCCACAATTGAGAGAAAAGG           | -                      | For qPCR      |
| <i>tomm-40</i> RT Reverse                    | CCATACTGATATAACCATCTCAGTTCC       | -                      | For qPCR      |
| <i>timmm-22</i> RT Forward                   | GAGGAGATCCTACGAAACAGCTAAC         | -                      | For qPCR      |
| <i>timmm-22</i> RT Reverse                   | GACAGCAAACCAGCGGC                 | -                      | For qPCR      |
| <i>gop-3</i> RT Forward                      | CACAGTATACATATACTGTAAAGGGCG       | -                      | For qPCR      |
| <i>gop-3</i> RT Reverse                      | CGCATTCAATTTGACTTGATGC            | -                      | For qPCR      |
| <i>gpi-1</i> RT Forward                      | GCTAGATTCGAGAAATTTACCCG           | -                      | For qPCR      |
| <i>gpi-1</i> RT Reverse                      | GCATGACGTCTTTCCGTC                | -                      | For qPCR      |
| <i>fgt-1</i> RT Forward                      | GTGCCAGAGTCTCCAAAGTAC             | -                      | For qPCR      |
| <i>fgt-1</i> RT Reverse                      | CTCCCTTGAACATATCTCCATT            | -                      | For qPCR      |
| <i>gsy-1</i> RT Forward                      | GAATCTCTCTGGTTTCGGATGC            | -                      | For qPCR      |

|                             |                              |   |                |
|-----------------------------|------------------------------|---|----------------|
| <i>gsy-1</i> RT Reverse     | GCGGCGGCAGTCACG              | - | For qPCR       |
| <i>icl-1</i> RT Forward     | GCTTCGAGTTGATGAAGGCC         | - | For qPCR       |
| <i>icl-1</i> RT Reverse     | GGTTCTTGCGACAATGATTGT        | - | For qPCR       |
| <i>tkl-1</i> RT Forward     | ACGTCTTCTACGTCTGCTGCC        | - | For qPCR       |
| <i>tkl-1</i> RT Reverse     | GATGAAGTTCAAGCGAGGAGTG       | - | For qPCR       |
| <i>hsp-6</i> RT Forward     | GAACCGGAAAGGAACAACAGATCG     | - | For qPCR       |
| <i>hsp-6</i> RT Reverse     | GCAATCTTGGTTCGGAGAGCCTC      | - | For qPCR       |
| <i>gspd-1</i> RT Forward    | GAAGTGCTCATACTCAGGG          | - | For qPCR       |
| <i>gspd-1</i> RT Reverse    | CCGAGATAATGATCAATACGGTAG     | - | For qPCR       |
| <i>pdk-1</i> RT Forward     | GAAGGAGCCTACAGCCAGGTATTC     | - | For qPCR       |
| <i>pdk-1</i> RT Reverse     | TAGCCTGGTCGTGAAAATGTGTG      | - | For qPCR       |
| <i>skn-1</i> RT Forward     | TCCACCAGGATCTCCATTCTG        | - | For qPCR       |
| <i>skn-1</i> RT Reverse     | CTCCATAGCACATCAATCAAGTCG     | - | For qPCR       |
| <i>aldo-1</i> RT Forward    | CAAGAAAGACGGAGCACAGTTCTG     | - | For qPCR       |
| <i>aldo-1</i> RT Reverse    | GTTACCCGTCTGGGAGGATCTCTG     | - | For qPCR       |
| <i>gpd-3</i> RT Forward     | CCAGCACAAGATCAAGGTCTAC       | - | For qPCR       |
| <i>gpd-3</i> RT Reverse     | CAGATGGAGCAGAGATGATGACCTTC   | - | For qPCR       |
| <i>enol-1</i> RT Forward    | GGTTGATCTTTTCACTGAGAAAGGAGTC | - | For qPCR       |
| <i>enol-1</i> RT Reverse    | CTGGAGCGATCTTCTCGTTGATG      | - | For qPCR       |
| <i>pyc-1</i> RT Forward     | CGTGGAGAACGCGAAGTCTTC        | - | For qPCR       |
| <i>pyc-1</i> RT Reverse     | GGTTGCTTCTTGGTAACCTTGTCG     | - | For qPCR       |
| <i>aco-2</i> RT Forward     | AAGATTTGGCCCGTGCTAAGGAC      | - | For qPCR       |
| <i>aco-2</i> RT Reverse     | TGAGAAGAAGTCTGGGAAAGCGTAG    | - | For qPCR       |
| <i>sdhb-1</i> RT Forward    | GCCAACTGTGCAGAAATTCTG        | - | For qPCR       |
| <i>sdhb-1</i> RT Reverse    | CTTCACAACGAACATATGTGGAAG     | - | For qPCR       |
| <i>pbs-5</i> RT Forward     | GTCGCCAAGTACTGCACTTTG        | - | For qPCR       |
| <i>pbs-5</i> RT Reverse     | CCTGAGCCAACTGAGCACAC         | - | For qPCR       |
| <i>rpn-6</i> RT Forward     | CTCAGGCTCTTCCACTTGCTG        | - | For qPCR       |
| <i>rpn-6</i> RT Reverse     | AGAGCTGCTTGCATGCGAG          | - | For qPCR       |
| <i>hsp-4-4</i> RT Forward   | ACGACCACAATCGTCTCAGTCC       | - | For qPCR       |
| <i>hsp-4</i> RT Reverse     | CTTCGTCAGTGAGCTTTCCTCC       | - | For qPCR       |
| <i>xbp-1s</i> RT Forward    | TGCCTTTGAATCAGCAGTGG         | - | For qPCR       |
| <i>xbp-1s</i> RT Reverse    | ACCGTCTGCTCCTTCTCAATG        | - | For qPCR       |
| <i>hsp-16.2</i> RT Forward  | TCTCTCCATCTGAGTCTTCTGAGATTG  | - | For qPCR       |
| <i>hsp-16.2</i> RT Reverse  | CTACCTGAAGATGTAGATGTTGGTGC   | - | For qPCR       |
| <i>dnj-21</i> RT Forward    | GAGGTTTAATTGTTGCCGG          | - | For qPCR       |
| <i>dnj-21</i> RT Reverse    | CCTCCTCTATCTGGATGATTTAC      | - | For qPCR       |
| <i>hsp-70</i> RT Forward    | ATGTGAACGTGCTAAGCGT          | - | For qPCR       |
| <i>hsp-70</i> RT Reverse    | GGTCCTTCCCATTGAAAAAC         | - | For qPCR       |
| <i>hsp-16.41</i> RT Forward | TTCCGATAATATTGGGGAGATTG      | - | For qPCR       |
| <i>hsp-16.41</i> RT Reverse | CGTTTCAAGTATCCATGTTCCG       | - | For qPCR       |
| <i>hsp-12.6</i> RT Forward  | GGAGATGGAGTTGTCAATGTCCTC     | - | For qPCR       |
| <i>hsp-12.6</i> RT Reverse  | GAATTCCATGTGAATCCAAGTTGC     | - | For qPCR       |
| <i>hsp-3</i> RT Forward     | TCCGGTGAGGTGCAACTTT          | - | For qPCR       |
| <i>hsp-3</i> RT Reverse     | ACCGTCACCATCCAGGTC           | - | For qPCR       |
| <i>atp-6</i> RT Forward     | GTTTATGCTGCTGTAGCGTG         | - | For mtDNA qPCR |
| <i>atp-6</i> RT Forward     | CTGTTAAAGCAAGTGGACGAG        | - | For mtDNA qPCR |

**Supplementary Table 2:** Summary of lifespan experiments under all conditions tested.

| Strain name         | RNAi treatment  | Supplement | Median Lifespan from hatching | Number of deaths (n) | Significance | Ref. Control        |
|---------------------|-----------------|------------|-------------------------------|----------------------|--------------|---------------------|
| wt                  | control         | -          | 23                            | 104                  |              |                     |
| wt                  | <i>timmm-23</i> | -          | 27                            | 94                   | ****         | wt                  |
| wt                  | <i>timmm-40</i> | -          | 27                            | 106                  | ****         | wt                  |
| wt                  | <i>timmm-23</i> | -          | 23                            | 124                  | ns           | wt                  |
| wt                  | <i>gop-3</i>    |            | 23                            | 9                    | ns           | wt                  |
| wt                  | control         | -          | 23                            | 93                   |              |                     |
| wt                  | <i>gop-3</i>    | -          | 23                            | 89                   | ns           | wt                  |
| wt                  | <i>timmm-23</i> | -          | 25                            | 86                   | ****         | wt                  |
| wt                  | <i>tomm-40</i>  | -          | 27                            | 73                   | ****         | wt                  |
| wt                  | <i>timmm-22</i> | -          | 21                            | 99                   | **           | wt                  |
| wt                  | control         | -          | 21                            | 69                   |              |                     |
| wt                  | <i>timmm-22</i> | -          | 20                            | 101                  | **           | wt                  |
| <i>daf-2(e1370)</i> | control         | -          | 48                            | 125                  |              |                     |
| <i>daf-2(e1370)</i> | <i>timmm-23</i> | -          | 53                            | 116                  | ****         | <i>daf-2(e1370)</i> |
| <i>daf-2(e1370)</i> | control         | -          | 39.5                          | 60                   |              |                     |
| <i>daf-2(e1370)</i> | <i>timmm-23</i> | -          | 45                            | 136                  | ***          | <i>daf-2(e1370)</i> |
| <i>daf-16(mu86)</i> | control         | -          | 20                            | 115                  |              |                     |
| <i>daf-16(mu86)</i> | <i>timmm-23</i> | -          | 27                            | 132                  | ****         | <i>daf-16(mu86)</i> |
| <i>daf-16(mu86)</i> | control         | -          | 15                            | 75                   |              |                     |
| <i>daf-16(mu86)</i> | <i>tomm-40</i>  | -          | 21                            | 40                   | ****         | <i>daf-16(mu86)</i> |
| <i>eat-2(ad465)</i> | control         | -          | 24                            | 115                  |              |                     |
| <i>eat-2(ad465)</i> | <i>timmm-23</i> | -          | 28                            | 142                  | ****         | <i>eat-2(ad465)</i> |
| <i>eat-2(ad465)</i> | control         | -          | 24                            | 79                   |              |                     |
| <i>eat-2(ad465)</i> | <i>timmm-23</i> | -          | 27                            | 86                   | ****         | <i>eat-2(ad465)</i> |
| <i>skn-1(zn129)</i> | control         | -          | 20                            | 31                   |              |                     |
| <i>skn-1(zn129)</i> | <i>timmm-23</i> | -          | 25                            | 24                   | ****         | <i>skn-1(zn129)</i> |
| <i>skn-1(zn129)</i> | control         | -          | 19                            | 75                   |              |                     |
| <i>skn-1(zn129)</i> | <i>timmm-23</i> | -          | 23                            | 67                   | ****         | <i>skn-1(zn129)</i> |
| <i>skn-1(zn135)</i> | control         | -          | 20                            | 52                   |              |                     |
| <i>skn-1(zn135)</i> | <i>timmm-23</i> | -          | 25                            | 66                   | ****         | <i>skn-1(zn135)</i> |
| <i>skn-1(zn67)</i>  | control         | -          | 19                            | 58                   |              |                     |
| <i>skn-1(zn67)</i>  | <i>timmm-23</i> | -          | 20                            | 79                   | ****         | <i>skn-1(zn67)</i>  |
| wt                  | control         | -          | 18                            | 147                  |              |                     |
| wt                  | <i>timmm-23</i> | -          | 20                            | 154                  | ****         | wt                  |
| <i>aak-2(ok524)</i> | control         | -          | 16                            | 111                  | **           | wt                  |
| <i>aak-2(ok524)</i> | <i>timmm-23</i> | -          | 24                            | 111                  | ****         | <i>aak-2(ok524)</i> |

|                       |                        |   |    |     |      |                       |
|-----------------------|------------------------|---|----|-----|------|-----------------------|
| <i>aak-2(ok524)</i>   | control                | - | 20 | 83  |      |                       |
| <i>aak-2(ok524)</i>   | <i>timmm-23</i>        | - | 22 | 128 | **** | <i>aak-2(ok524)</i>   |
| <i>hif-1(ia04)</i>    | control                | - | 22 | 99  |      |                       |
| <i>hif-1(ia04)</i>    | <i>timmm-23</i>        | - | 28 | 72  | **** | <i>hif-1(ia04)</i>    |
| <i>hif-1(ia04)</i>    | control                | - | 22 | 86  |      |                       |
| <i>hif-1(ia04)</i>    | <i>timmm-23</i>        | - | 26 | 92  | **** | <i>hif-1(ia04)</i>    |
| <i>ceh-23(ms23)</i>   | control                | - | 24 | 110 |      |                       |
| <i>ceh-23(ms23)</i>   | <i>timmm-23</i>        | - | 26 | 139 | **** | <i>ceh-23(ms23)</i>   |
| <i>cep-1(lg12501)</i> | control                | - | 22 | 118 |      |                       |
| <i>cep-1(lg12501)</i> | <i>timmm-23</i>        | - | 27 | 97  | **** | <i>cep-1(lg12501)</i> |
| wt                    | control                | - | 24 | 109 |      |                       |
| wt                    | <i>timmm-23</i>        | - | 32 | 103 | **** | wt                    |
| <i>cep-1(lg12501)</i> | control                | - | 26 | 109 |      |                       |
| <i>cep-1(lg12501)</i> | <i>timmm-23</i>        | - | 32 | 88  | **** | <i>cep-1(lg12501)</i> |
| <i>cep-1(gk138)</i>   | control                | - | 24 | 72  |      |                       |
| <i>cep-1(gk138)</i>   | <i>timmm-23</i>        | - | 26 | 107 | **** | <i>cep-1(gk138)</i>   |
| <i>ceh-23(ms23)</i>   | control                | - | 22 | 113 |      |                       |
| <i>ceh-23(ms23)</i>   | <i>timmm-23</i>        | - | 25 | 131 | **** | <i>ceh-23(ms23)</i>   |
| <i>cep-1(lg12501)</i> | control                | - | 22 |     |      |                       |
| <i>cep-1(lg12501)</i> | <i>timmm-23</i>        | - | 27 |     |      |                       |
| <i>atfs-1(tm4525)</i> | control                | - | 21 | 106 |      |                       |
| <i>atfs-1(tm4525)</i> | <i>timmm-23</i>        | - | 20 | 101 | ns   | <i>atfs-1(tm4525)</i> |
| wt                    | control                | - | 19 | 68  |      |                       |
| wt                    | <i>tomm-40</i>         |   | 20 | 101 | *    | wt                    |
| <i>atfs-1(tm4525)</i> | control                | - | 18 | 90  |      |                       |
| <i>atfs-1(tm4525)</i> | <i>timmm-23</i>        | - | 16 | 94  | ns   | <i>atfs-1(tm4525)</i> |
| <i>atfs-1(tm4525)</i> | <i>tomm-40</i>         | - | 16 | 87  | ns   | <i>atfs-1(tm4525)</i> |
| wt                    | control                | - | 21 | 67  |      |                       |
| wt                    | <i>timmm-23</i>        | - | 24 | 91  | **** | wt                    |
| wt                    | <i>tomm-40</i>         | - | 24 | 40  | **** | wt                    |
| <i>atfs-1(tm4525)</i> | control                | - | 20 | 70  |      |                       |
| <i>atfs-1(tm4525)</i> | <i>timmm-23</i>        | - | 20 | 58  | ns   | <i>atfs-1(tm4525)</i> |
| <i>atfs-1(tm4525)</i> | <i>tomm-40</i>         | - | 20 | 84  | ns   | <i>atfs-1(tm4525)</i> |
| wt                    | control                | - | 21 | 69  |      |                       |
| wt                    | <i>tomm-40</i>         | - | 25 | 71  | **** | control               |
| wt                    | <i>atfs-1</i>          | - | 21 | 57  | ns   | control               |
| wt                    | <i>atfs-1; tomm-40</i> | - | 21 | 87  | ns   | <i>atfs-1</i>         |
| wt                    | control                | - | 23 | 88  |      |                       |
| wt                    | <i>timmm-23</i> ½      | - | 26 | 85  | **** | wt                    |
| wt                    | <i>atfs-1</i> ½        | - | 23 | 96  | ns   | wt                    |

|                      |                                        |            |    |     |      |                      |
|----------------------|----------------------------------------|------------|----|-----|------|----------------------|
| wt                   | <i>atfs-1</i> ½;<br><i>timmm-23</i> ½  | -          | 23 | 108 | ns   | wt                   |
| wt                   | control                                | -          | 23 | 85  |      |                      |
| wt                   | <i>timmm-23</i> ½                      | -          | 26 | 69  | **** | wt                   |
| wt                   | <i>atfs-1</i> ½                        | -          | 23 | 84  | ns   | wt                   |
| wt                   | <i>atfs-1</i> ½ ;<br><i>timmm-23</i> ½ | -          | 24 | 99  | ns   | wt                   |
| wt                   | control                                | -          | 18 | 70  |      |                      |
| wt                   | <i>tomm-40</i>                         | -          | 23 | 54  | ***  | wt                   |
| <i>fgt-1(tm3165)</i> | control                                | -          | 23 | 85  | ***  | wt                   |
| <i>fgt-1(tm3165)</i> | <i>tomm-40</i>                         | -          | 23 | 65  | ns   | <i>fgt-1(tm3165)</i> |
| <i>fgt-1(tm3165)</i> | control                                | -          | 21 | 82  |      |                      |
| <i>fgt-1(tm3165)</i> | <i>tomm-40</i>                         | -          | 21 | 64  | ns   | <i>fgt-1(tm3165)</i> |
| wt                   | control                                | -          | 22 | 71  |      |                      |
| wt                   | <i>tomm-40</i>                         | -          | 30 | 109 | **** | wt                   |
| Wt                   | <i>gpi-1</i>                           | -          | 27 | 77  | **** | wt                   |
| wt                   | <i>gpi-1</i> ;<br><i>tomm-40</i>       | -          | 22 | 54  | **** | <i>tomm-40</i>       |
| wt                   | control                                | -          | 22 | 142 |      |                      |
| wt                   | <i>tomm-40</i>                         | -          | 26 | 130 | **** | wt                   |
| Wt                   | <i>gpi-1</i>                           | -          | 23 | 89  | **   | wt                   |
| wt                   | <i>gpi-1</i> ;<br><i>tomm-40</i>       | -          | 21 | 109 | **** | <i>tomm-40</i>       |
| wt                   | control                                | -          | 21 | 79  |      |                      |
| wt                   | <i>tomm-40</i>                         | -          | 24 | 117 | **** | wt                   |
| wt                   | <i>gpi-1</i>                           | -          | 23 | 162 | **   | wt                   |
| wt                   | <i>gpi-1</i> ;<br><i>tomm-40</i>       | -          | 19 | 139 | **** | <i>tomm-40</i>       |
| wt                   | control                                | -          | 22 | 71  |      |                      |
| wt                   | <i>tomm-40</i>                         | -          | 30 | 109 | **** | wt                   |
| wt                   | <i>phgdh-1</i>                         | -          | 30 | 27  | **** | wt                   |
| wt                   | <i>phgdh-1</i> ;<br><i>tomm-40</i>     | -          | 22 | 75  | **** | <i>tomm-40</i>       |
| wt                   | control                                | -          | 21 | 79  |      |                      |
| wt                   | <i>tomm-40</i>                         | -          | 24 | 116 | **** | wt                   |
| wt                   | <i>phgdh-1</i>                         | -          | 24 | 99  | **** | wt                   |
| wt                   | <i>phgdh-1</i> ;<br><i>tomm-40</i>     | -          | 19 | 106 | **** | <i>tomm-40</i>       |
| wt                   | control                                | -          | 22 | 142 |      |                      |
| wt                   | <i>tomm-40</i>                         | -          | 26 | 130 | **** | wt                   |
| wt                   | <i>phgdh-1</i>                         | -          | 23 | 59  | ***  | wt                   |
|                      | <i>phgdh-1</i> ;<br><i>tomm-40</i>     | -          | 21 | 114 | **** | <i>tomm-40</i>       |
| wt                   | control                                | 0mM Serine | 18 | 142 |      |                      |
| wt                   | control                                | 5mM Serine | 21 | 136 | **** | control (0mM Serine) |

|    |                |             |    |     |      |                             |
|----|----------------|-------------|----|-----|------|-----------------------------|
| wt | control        | 25mM Serine | 18 | 112 | ***  | control (0mM Serine)        |
| wt | control        | 50mM Serine | 18 | 113 | **** | control (0mM Serine)        |
| wt | control        | 0mM Serine  | 19 | 135 |      |                             |
| wt | control        | 5mM Serine  | 22 | 125 | ***  | control (0mM Serine)        |
| wt | control        | 25mM Serine | 20 | 126 | **   | control (0mM Serine)        |
| wt | control        | 50mM Serine | 20 | 137 | **   | control (0mM Serine)        |
| wt | control        | 0mM Serine  | 19 | 126 |      |                             |
| wt | control        | 5mM Serine  | 23 | 89  | ***  | control (0mM Serine)        |
| wt | control        | 25mM Serine | 19 | 131 | *    | control (0mM Serine)        |
| wt | control        | 50mM Serine | 19 | 101 | **   | control (0mM Serine)        |
| wt | <i>tomm-40</i> | 0mM Serine  | 22 | 104 |      |                             |
| wt | <i>tomm-40</i> | 5mM Serine  | 22 | 117 | ns   | <i>tomm-40</i> (0mM Serine) |
| wt | <i>tomm-40</i> | 25mM Serine | 18 | 112 | ***  | <i>tomm-40</i> (0mM Serine) |
| wt | <i>tomm-40</i> | 50mM Serine | 18 | 95  | ***  | <i>tomm-40</i> (0mM Serine) |
| wt | <i>tomm-40</i> | 0mM Serine  | 23 | 134 |      |                             |
| wt | <i>tomm-40</i> | 5mM Serine  | 23 | 122 | ns   | <i>tomm-40</i> (0mM Serine) |
| wt | <i>tomm-40</i> | 25mM Serine | 19 | 120 | ***  | <i>tomm-40</i> (0mM Serine) |
| wt | <i>tomm-40</i> | 50mM Serine | 18 | 105 | ***  | <i>tomm-40</i> (0mM Serine) |
| wt | <i>phgdh-1</i> | 0mM Serine  | 22 | 114 |      |                             |
| wt | <i>phgdh-1</i> | 5mM Serine  | 23 | 151 | **   | <i>phgdh-1</i> (0mM Serine) |
| wt | <i>phgdh-1</i> | 25mM Serine | 19 | 109 | **   | <i>phgdh-1</i> (0mM Serine) |

|                                  |                                    |             |    |     |      |                                    |
|----------------------------------|------------------------------------|-------------|----|-----|------|------------------------------------|
| wt                               | <i>phgdh-1</i>                     | 50mM Serine | 17 | 116 | **   | <i>phgdh-1</i> (0mM Serine)        |
| wt                               | <i>phgdh-1</i>                     | 0mM Serine  | 20 | 126 |      |                                    |
| wt                               | <i>phgdh-1</i>                     | 5mM Serine  | 22 | 71  | **   | <i>phgdh-1</i> (0mM Serine)        |
| wt                               | <i>phgdh-1</i>                     | 25mM Serine | 21 | 93  | *    | <i>phgdh-1</i> (0mM Serine)        |
| wt                               | <i>phgdh-1</i>                     | 50mM Serine | 20 | 117 | *    | <i>phgdh-1</i> (0mM Serine)        |
| wt                               | control                            | -           | 23 | 109 |      |                                    |
| wt                               | <i>tomm-40</i>                     | -           | 27 | 112 | **** | wt                                 |
| wt                               | control                            | 5mM Serine  | 27 | 120 | **** | wt                                 |
| wt                               | <i>tomm-40</i>                     | 5mM Serine  | 27 | 89  | ns   | 5mM Serine control                 |
| wt                               | control                            | 5mM Serine  | 23 | 80  |      |                                    |
| wt                               | <i>tomm-40</i>                     | 5mM Serine  | 23 | 45  | ns   | 5mM Serine control                 |
| wt                               | <i>phgdh-1</i> ;<br><i>tomm-40</i> | -           | 22 | 75  |      |                                    |
| wt                               | <i>phgdh-1</i> ;<br><i>tomm-40</i> | 5mM Serine  | 23 | 45  | ns   | <i>phgdh-1</i> ;<br><i>tomm-40</i> |
| wt                               | <i>phgdh-1</i> ;<br><i>tomm-40</i> | -           | 21 | 114 |      |                                    |
| wt                               | <i>phgdh-1</i> ;<br><i>tomm-40</i> | 5mM Serine  | 21 | 109 | ns   | <i>phgdh-1</i> ;<br><i>tomm-40</i> |
| NR350 (Muscle specific RNAi)     | control                            | -           | 27 | 35  |      |                                    |
| NR350 (Muscle specific RNAi)     | <i>tomm-40</i>                     | -           | 30 | 172 | **** | NR350                              |
| NR350 (Muscle specific RNAi)     | control                            | -           | 23 | 81  |      |                                    |
| NR350 (Muscle specific RNAi)     | <i>tomm-40</i>                     | -           | 24 | 86  | ***  | NR350                              |
| VP303 (Intestine specific RNAi)  | control                            | -           | 23 | 190 |      |                                    |
| VP303 (Intestine specific RNAi)  | <i>tomm-40</i>                     | -           | 24 | 100 | **   | VP303                              |
| VP303 (Intestine specific RNAi)  | control                            | -           | 20 | 85  |      |                                    |
| VP303 (Intestine specific RNAi)  | <i>tomm-40</i>                     | -           | 21 | 100 | ***  | VP303                              |
| NR222 (Hypodermis specific RNAi) | control                            | -           | 23 | 102 |      |                                    |

|                                        |                                                |           |    |     |      |                                     |
|----------------------------------------|------------------------------------------------|-----------|----|-----|------|-------------------------------------|
| NR222<br>(Hypodermis<br>specific RNAi) | <i>tomm-40</i>                                 | -         | 23 | 98  | ns   | NR222                               |
| NR222<br>(Hypodermis<br>specific RNAi) | control                                        | -         | 23 | 57  |      |                                     |
| NR222<br>(Hypodermis<br>specific RNAi) | <i>tomm-40</i>                                 | -         | 23 | 255 | ns   | NR222                               |
| TU3401<br>(Neuron<br>specific RNAi)    | control                                        | -         | 20 | 90  |      |                                     |
| TU3401<br>(Neuron<br>specific RNAi)    | <i>tomm-40</i>                                 | -         | 20 | 97  | ns   | TU3401                              |
| TU3401<br>(Neuron<br>specific RNAi)    | control                                        | -         | 23 | 126 |      |                                     |
| TU3401<br>(Neuron<br>specific RNAi)    | <i>tomm-40</i>                                 | -         | 23 | 184 | ns   | TU3401                              |
| wt                                     | control                                        | -         | 17 | 115 |      |                                     |
| wt                                     | control                                        | D-glucose | 16 | 220 | **** | control                             |
| wt                                     | <i>tomm-40</i>                                 | -         | 22 | 103 | **** | control                             |
| wt                                     | <i>tomm-40</i>                                 | D-glucose | 18 | 192 | **** | <i>tomm-40</i>                      |
| wt                                     | control                                        | -         | 20 | 76  |      |                                     |
| wt                                     | control                                        | D-glucose | 17 | 139 | **** | control                             |
| wt                                     | <i>tomm-40</i>                                 | -         | 22 | 108 | **** | control                             |
| wt                                     | <i>tomm-40</i>                                 | D-glucose | 18 | 204 | **** | <i>tomm-40</i>                      |
| wt                                     | control                                        | -         | 21 | 78  |      |                                     |
| wt                                     | <i>timmm-23</i> ½                              | -         | 25 | 64  | **** | control                             |
| wt                                     | <i>ucr-1</i> ½                                 | -         | 24 | 65  | **** | control                             |
| wt                                     | <i>timmm-23</i> ½<br>; <i>ucr-1</i> ½          | -         | 29 | 54  | **** | <i>timmm-23</i><br>and <i>ucr-1</i> |
| wt                                     | <i>ucr-1</i> ½                                 | -         | 23 | 42  |      |                                     |
| wt                                     | <i>timmm-23</i> ½                              | -         | 23 | 53  |      |                                     |
| wt                                     | <i>ucr-1</i> ½;<br><i>timmm-23</i> ½           | -         | 25 | 60  | **** | <i>timmm-23</i>                     |
| wt                                     | control                                        | -         | 21 | 106 |      |                                     |
| wt                                     | <i>timmm-23</i><br>1/10                        | -         | 23 | 70  | **** | control                             |
| wt                                     | <i>cco-1</i> 1/10                              | -         | 23 | 82  | **** | control                             |
| wt                                     | <i>timmm-23</i><br>9/10<br>; <i>cco-1</i> 1/10 | -         | 25 | 71  | **** | <i>timmm-23</i><br>and <i>cco-1</i> |
| wt                                     | control                                        | -         | 19 | 147 |      |                                     |
| wt                                     | <i>timmm-23</i><br>9/10                        | -         | 21 | 120 | **** | control                             |
| wt                                     | <i>cco-1</i> 1/10                              | -         | 21 | 157 | **** | control                             |



|                      |                                               |                 |    |     |      |                                     |
|----------------------|-----------------------------------------------|-----------------|----|-----|------|-------------------------------------|
| wt                   | <i>timmm-23</i><br>9/10; <i>cco-1</i><br>1/10 | -               | 25 | 61  | **** | <i>timmm-23</i><br>and <i>cco-1</i> |
| wt                   | control                                       | -               | 21 | 104 |      |                                     |
| wt                   | <i>timmm-23</i><br>9/10                       | -               | 23 | 70  | **** | control                             |
| wt                   | <i>atp-3</i> 1/10                             | -               | 27 | 50  | **** | control                             |
| wt                   | <i>timmm-23</i><br>9/10; <i>atp-3</i><br>1/10 | -               | 30 | 62  | ***  | <i>timmm-23</i><br>and <i>atp-3</i> |
| wt                   | control                                       | -               | 22 | 70  |      |                                     |
| wt                   | <i>timmm-23</i>                               | -               | 26 | 92  | **** | control                             |
| <i>haf-1(ok705)</i>  | control                                       | -               | 22 | 22  |      |                                     |
| <i>haf-1(ok705)</i>  | <i>timmm-23</i>                               | -               | 30 | 30  | **** | <i>haf-1(ok705)</i>                 |
| <i>dve-1(tm4803)</i> | control                                       | -               | 24 | 63  |      |                                     |
| <i>dve-1(tm4803)</i> | <i>timmm-23</i>                               | -               | 36 | 65  | **** | <i>dve-1(tm4803)</i>                |
| wt                   | control                                       | -               | 20 | 113 |      |                                     |
| wt                   | <i>tomm-40</i>                                | -               | 26 | 125 | **** | control                             |
| <i>dve-1(tm4803)</i> | control                                       | -               | 23 | 68  |      |                                     |
| <i>dve-1(tm4803)</i> | <i>tomm-40</i>                                | -               | 26 | 94  | **** | <i>dve-1(tm4803)</i>                |
| wt                   | control                                       | -               | 21 | 69  |      |                                     |
| wt                   | <i>tomm-40</i>                                | -               | 25 | 71  | **** | control                             |
| wt                   | <i>dve-1</i>                                  | -               | 18 | 106 |      |                                     |
| wt                   | <i>dve-1;tomm-40</i>                          | -               | 19 | 95  | **** | <i>dve-1</i>                        |
| wt                   | <i>dve-1</i>                                  | -               | 23 | 68  |      |                                     |
| wt                   | <i>dve-1;tomm-40</i>                          | -               | 26 | 94  | **** | <i>dve-1</i>                        |
| wt                   | control                                       | -               | 22 | 67  |      |                                     |
| wt                   | <i>timmm-23</i><br>from L4                    |                 | 24 | 117 | *    | wt                                  |
| wt                   | <i>tomm-40</i><br>from L4                     |                 | 24 | 66  | *    | wt                                  |
| wt                   | control                                       | -               | 26 | 125 |      |                                     |
| wt                   | <i>timmm-23</i><br>from L4                    | -               | 29 | 117 | ***  | wt                                  |
| wt                   | <i>tomm-40</i><br>from L4                     | -               | 26 | 94  | **   | wt                                  |
| wt                   | OP50                                          | 0 $\mu$ M DECA  | 17 | 60  |      |                                     |
| wt                   | OP50                                          | 5 $\mu$ M DECA  | 17 | 59  | *    | wt                                  |
| wt                   | OP50                                          | 10 $\mu$ M DECA | 17 | 53  | *    | wt                                  |
| wt                   | OP50                                          | 20 $\mu$ M DECA | 18 | 49  | **** | wt                                  |
| wt                   | HT115                                         | 0 $\mu$ M DECA  | 20 | 60  |      |                                     |
| wt                   | HT115                                         | 5 $\mu$ M DECA  | 20 | 59  | ns   | wt                                  |
| wt                   | HT115                                         | 20 $\mu$ M DECA | 20 | 49  | **   | wt                                  |
| wt                   | control                                       | -               | 24 | 117 |      |                                     |
| wt                   | <i>tomm-40</i>                                |                 | 27 | 87  | **** | wt                                  |
| wt                   | <i>tomm-40</i> $\frac{1}{2}$                  |                 | 24 | 131 | ns   | wt                                  |
| wt                   | <i>hsp-60</i>                                 |                 | 18 | 119 | **** | wt                                  |
| wt                   | <i>hsp-60</i> $\frac{1}{2}$                   |                 | 18 | 110 | **** | wt                                  |

|                                     |                                                   |  |    |     |      |                   |
|-------------------------------------|---------------------------------------------------|--|----|-----|------|-------------------|
| wt                                  | <i>hsp-60</i><br><i>1/2;tomm-40</i><br><i>1/2</i> |  | 22 | 125 | **** | <i>hsp-60 1/2</i> |
| wt                                  | control                                           |  | 24 | 94  |      |                   |
| wt                                  | <i>tomm-40</i>                                    |  | 26 | 105 | **** | wt                |
| wt                                  | <i>tomm-40 1/2</i>                                |  | 24 | 144 | ns   | wt                |
| wt                                  | <i>hsp-60</i>                                     |  | 17 | 143 | **** | wt                |
| wt                                  | <i>hsp-60 1/2</i>                                 |  | 17 | 137 | **** | wt                |
| wt                                  | <i>hsp-60</i><br><i>1/2;tomm-40</i><br><i>1/2</i> |  | 24 | 138 | **** | <i>hsp-60 1/2</i> |
| TU3401<br>(Neuron<br>specific RNAi) | Control                                           |  | 18 | 220 |      |                   |
| TU3401<br>(Neuron<br>specific RNAi) | <i>cco-1</i>                                      |  | 18 | 317 | ns   | TU3401            |
| TU3401<br>(Neuron<br>specific RNAi) | <i>cco-1 1/10</i>                                 |  | 20 | 294 | **   | TU3401            |
| TU3401<br>(Neuron<br>specific RNAi) | Control                                           |  | 20 | 229 |      |                   |
| TU3401<br>(Neuron<br>specific RNAi) | <i>cco-1</i>                                      |  | 20 | 341 | **   | TU3401            |
| TU3401<br>(Neuron<br>specific RNAi) | <i>cco-1 1/10</i>                                 |  | 22 | 228 | ***  | TU3401            |

Combination and dilution of different RNAi are denoted as  $1/2$ ,  $1/10$ ,  $9/10$ . Lifespan curves were statistically analyzed with the Log-rank (Mantel-Cox) test (\*\*\*\* denotes  $P < 0.0001$ , \*\*\* denotes  $P < 0.001$ , \*\* denotes  $P < 0.01$  and \*denotes  $P < 0.05$ )

**Supplementary Table 3.** The metabolites identified with significantly higher abundance in the tomm40 (RNAi) compared to the control worms at CT1 and CT2, based on the SAM method.

| <b>Metabolites with significant abundance increase</b>   |                                                           |
|----------------------------------------------------------|-----------------------------------------------------------|
| <b>CT1</b>                                               | <b>CT2</b>                                                |
| 1. CE_Un0002 (RT:15.648/QI:199//organic acid putatively) | 1. glycerol                                               |
| 2. glycerol                                              | 2. glycine_effective                                      |
| 3. GABA                                                  | 3. pyruvate                                               |
| 4. ethanolamine-phosphate                                | 4. putrescine (4TMS) (Un_0129)                            |
| 5. glycine_effective                                     | 5. serine_effective                                       |
| 6. 3-phosphoglycerate                                    | 6. lactate                                                |
| 7. myo-inositol                                          | 7. lysine (4TMS)                                          |
| 8. trehalose                                             | 8. threonine_effective                                    |
| 9.Un_0067 (P3458/a70/f_37// phospho-compound)            | 9. glycerol 3-phosphate                                   |
| 10. fumarate                                             | 10.Un_0063 (a_39/x_2/U_032// RT:20.913/QI:263)            |
| 11. beta-alanine                                         | 11. aminomalonic acid                                     |
| 12. threonine effective                                  | 12. cysteine NNO (4TMS)                                   |
| 13. aspartate (3TMS)                                     | 13. tryptophan_effective                                  |
| 14. serine (3TMS)                                        | 14.Un_0055 MeOx1 (A_116/f_26// RT:27.611/QI:217// sugar)  |
| 15. lactate                                              | 15. Un_0017 (P1091/C_041)                                 |
| 16. putrescine (4TMS) (Un_0129)                          | 16. myo-inositol                                          |
| 17. glutamate_effective                                  | 17. Unrev_289 (P3502// sugar phosphate)                   |
| 18. lysine (4TMS)                                        | 18. CE_Un0007 (RT:28.152/QI:117)                          |
| 19. Un_0088 (K_47/A_077// RT:22.282/QI:188)              | 19.Un_0102 (P3188/U_062// fatty acid putatively)          |
| 20. malate                                               | 20. sorbitol                                              |
| 21. Un_0017 (P1091/C_041)                                | 21. A_052 (RT:17.309/QI:298)                              |
| 22. vitamin B5 (Un_0060/P3075/a_68/unknown no 114)       | 22. trehalose                                             |
| <b>FDR-median = 0%</b>                                   | 23. Un_0126 (A_170// RT:34.244/QI:339)                    |
| 23. threonate                                            | 24. threonate                                             |
| 24. A_052 (RT:17.309/QI:298)                             | 25. malate                                                |
| 25. 2-hydroxyglutaric acid                               | <b>FDR-median = 0%</b>                                    |
| 26. glycerol monostearate                                | 26. CE_Un0002 (RT:15.648/QI:199//organic acid putatively) |
| 27. urea (2TMS)                                          | 27. vitamin B5 (Un_0060/P3075/a_68/unknown no 114)        |
| 28. isoleucine (2TMS)                                    | 28. glucose_total                                         |
| 29. citrate                                              | 29. glycerol monostearate                                 |
| 30. Un_0136 (P3960// fatty acid putatively)              | 30. Un_0136 (P3960// fatty acid putatively)               |
| 31. Unrev_289 (P3502// sugar phosphate)                  | 31. CE_Un0008 (RT:29.068/QI:129)                          |
| 32. aminomalonic acid (3TMS)                             | 32. CE_Un0004 (RT:24.276/QI:266)                          |
| 33. CE_Un0007 (RT:28.152/QI:117)                         | 33. benzoate                                              |
| 34. phosphate (4TMS)                                     | 34. myristate                                             |

|                             |                             |
|-----------------------------|-----------------------------|
| 35. sorbitol (6TMS)         | 35. octadecanoic acid       |
| 36. glucose-6P MeOx1        | 36. alanine_effective       |
| <i>FDR-median = 0.329 %</i> | <i>FDR-median = 0.486 %</i> |

The results for each collection time are separated into two groups: the first includes the positively significant metabolites for the smallest significance threshold for which the FDR-median is 0 and the second, the additional metabolites identified as positively significant for the smallest possible significant threshold for these datasets based on SAM, still corresponding to a very small FDR-median. The corresponding SAM curves are shown in Supplementary Figs 7c and 8c for CT1 and CT2, respectively. The relative abundances of these metabolites for CT1 and CT2 are shown in the heat maps of Fig. 5a and b.

Blots from Supplementary Figure 3e

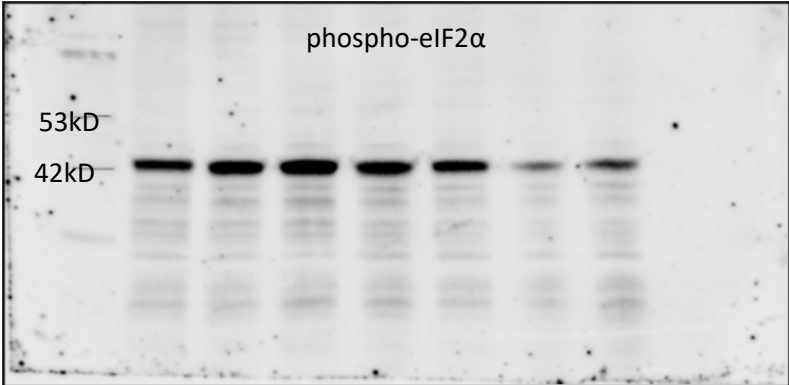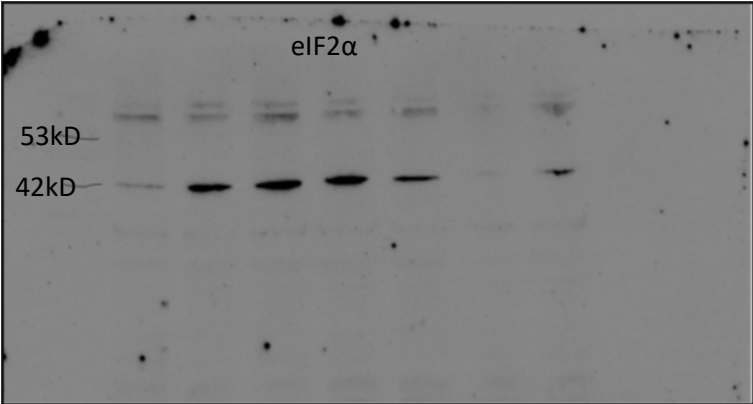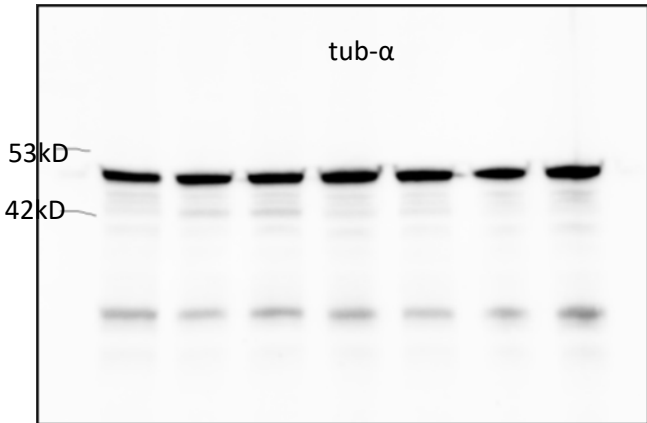

Supplement: 41467_2022_28272_MOESM1_ESM.pdf [file 41467_2022_28272_MOESM1_ESM.pdf]
