# Supplementary material for: Mitochondrial protein import determines lifespan through metabolic reprogramming and de novo serine biosynthesis
Source: Nat Commun. 2022 Feb 3;13:651. doi: 10.1038/s41467-022-28272-1 (PMC8814026; doi:10.1038/s41467-022-28272-1)
Supplement: Supplementary file 4 — Supplementary Data [file 41467_2022_28272_MOESM4_ESM.xlsx]

## Sheet: A. Raw_Peak Areas
Supplementary Data 1: A. The Raw GC-MS Metabolomic Dataset (Peak Areas) considered in the analyses
							Collection Time 1																			Collection Time 2
THE MS-RECONSTRUCTED CHROMATOGRAMS (RAW DATA) AS DERIVED FROM THE GC-MS EQUIPMENT SOFTWARE ARE PROVIDED IN: https://tavernarakislab.gr/publications/lionaki_et_al.zip
					Original Worm Pellet weight		100 mg												100 mg			100 mg				107 mg			105.6 mg										41.5mg *			69 mg
Metabolite Derivative	Metabolite Name	RT(min)	Quan Ion	Chemical Category	P/NQ		Control_a_9h	Control_a_10h	Control_a_11h	Control_b_11h	Control_b_12h	Control_b_13h	Control_b_15h	Control_b_16h	Control_b_17h	Control_b_19h	Control_b_20h	Control_b_21h	tomm40 (RNAi)_1a_11h	tomm40 (RNAi)_1a_12h	tomm40 (RNAi)_1a_13h	tomm40 (RNAi)_2a_9h	tomm40 (RNAi)_2a_10h	tomm40 (RNAi)_2a_11h		Control_1a_11h	Control_1a_12h	Control_1a_13h	Control_2a_14h	Control_2a_15h	Control_2a_16h	Control_2b_9h	Control_2b_10h	Control_2b_11h	Control_2b_13h	Control_2b_14h	Control_2b_15h	Control_2b_16h	tomm40 (RNAi)_1_9h	tomm40 (RNAi)_1_10h	tomm40 (RNAi)_1_11h	tomm40 (RNAi)_2a_9h	tomm40 (RNAi)_2a_10h	tomm40 (RNAi)_2a_11h		Metabolite Derivative Name	Metabolite Name	RT(min)	Quan Ion
lactate (2TMS)	lactate	7.021	117	1	P		88408	86198	86326	34072	36020	35836	38801	38554	38066	41042	41819	41281	85904	83652	88573	72490	74015	67385		39195	63912	63755	54377	55536	52330	30424	28553	29739	30988	29456	30599	30036	60255	45469	59504	54722	40437	52893		lactate (2TMS)	lactate	6.751	117
alanine (2TMS)	alanine	7.83	116	3	P		445639	671163	637743	269850	272450	271759	291421	301011	298314	314351	319031	324326	546787	501364	525442	415716	430688	364671		124834	314892	318695	310094	372456	339866	203392	215129	212834	221431	181222	197987	164067	192192	156201	219179	156264	167630	180715		alanine (2TMS)	alanine (2TMS)	7.577	116
glycine (2TMS)	glycine	8.79	102	3	P		3084	4716	4997	898	673	1204	552	836	1045	608	717	1347	910	1349	1330	3304	4778	5294		412	626	783	601	636	679	450	518	523	602	544	579	594	565	619	960	777	691	1279		glycine (2TMS)	glycine (2TMS)	8.681	102
valine (1TMS)	valine (1TMS)	9.125	72	3	NQ (small peak)																					7429	9468	9016	8834	8136	7944	6604	6491	6554	6968	7476	7389	8425	7793	5546	6829	7363	4352	5454		valine (1TMS)	valine (1TMS)	8.925	72
pyruvate (2TMS)	pyruvate	9.442	174	1	P		1606	1585	1656	529	689	664	655	685	668	637	584	531	1529	1537	1509	870	899	965		326	378	365	380	349	406	198	197	233	205	229	221	229	982	793	1010	929	672	963		pyruvate (2TMS)	pyruvate	9.166	174
CE_Un0001 (putatively 2-amino butyric acid by NIST )	CE_Un0001 (putatively 2-amino butyric acid by NIST )	9.91	130	1	P		13368	21372	20241	7815	8124	8687	8764	8965	9107	9462	10237	10388	9074	8675	9303	7870	8715	6901		3643	9758	9778	9766	12056	11153	6340	6855	6946	7284	6390	6370	6074	2221	3112	3941	1745	2658	2997		CE_Un0001 (putatively 2-amino butyric acid by NIST )	CE_Un0001 (putatively 2-amino butyric acid by NIST )	9.656	130
2-hydroxybutanoic acid (2TMS)	2-hydroxybutanoic acid	10.059	233	1	P		4411	4360	4141	1813	1998	1834	1946	1984	2065	2159	2144	2200	1876	1925	1787	1529	1702	1568		3462	5925	6253	6144	6325	6034	3876	3784	3699	4096	3886	3834	3893	2571	2052	2793	1872	1383	1737		2-hydroxybutanoic acid (2TMS)	2-hydroxybutanoic acid	9.825	233
Un_0017 (P1091;C_041)	Un_0017 (P1091/C_041)	10.777	220	1	P		10899	13368	12887	6897	7445	7483	8218	8200	8702	8832	9117	9512	16454	17485	18303	12775	13395	11508		9597	16861	17306	17389	17591	17727	15765	15672	15807	17129	16167	16329	16708	16279	12794	17584	15178	11865	15825		Un_0017 (P1091/C_041)	Un_0017 (P1091/C_041)	10.496	220
valine (2TMS)	valine	10.97	144	3	P		41788	56659	55337	24381	24838	25450	26202	26245	27064	27507	28528	29777	42124	39537	41712	33989	35470	30424		12167	30533	30805	32845	38906	37073	20482	21957	21342	22881	19906	20644	18259	10531	12978	17950	8799	12512	14892		valine (2TMS)	valine (2TMS)	10.723	144
ethanolamine, 3TMS [derivative 2 out of 2 potential]	ethanolamine	11.181	174	3	P		2596	2989	2970	1596	1609	1465	1854	1705	1734	2005	1965	1831	2520	2124	2444	1805	1982	906		1528	2553	2686	2337	2484	2570	1930	1872	1809	2052	1772	1879	1853	1452	1229	1674	1018	781	1033		ethanolamine (3TMS)	ethanolamine (3TMS)	10.938	174
valine (3TMS)	valine	11.652	188+216+172	3	P		4509	6061	4567	1446	1386	1572	1555	1732	1811	1845	1918	2447	4370	3247	4087	3423	3947	4171		2834	6042	5794	5405	5966	6250	2655	2942	3106	3649	3367	3697	3824	3577	3192	4481	3293	2844	4270		valine (3TMS)	valine (3TMS)	11.383	188+216+172
isoleucine (1TMS)	isoleucine (1TMS)	11.876	86	3	NQ (small peak)																					4346	5959	6648	5701	5164	6031	4167	4313	4258	4458	4777	4665	5241	4866	3304	4489	5055	3344	3747		isoleucine (1TMS)	isoleucine (1TMS)	11.676	86
glycerol (3TMS)	glycerol	11.961	205	1	P		18504	17961	17951	7701	8112	7478	8480	8298	8742	8799	9489	9488	35778	34790	35609	30884	29946	27893		36782	43830	42598	40360	36493	39108	33049	31648	32540	34995	34972	34311	36748	79586	64196	79356	82692	63981	78454		glycerol (3TMS)	glycerol	11.743	205
leucine (2TMS)	leucine	12.627	158	3	P		47832	65558	62240	28029	28554	28583	29884	30934	30771	31095	33076	34431	40703	38016	41282	30261	31354	26480		13845	37633	36967	39868	48139	44405	26803	26887	26817	28874	24477	24818	22640	5850	11941	16662	6234	13016	14910		leucine (2TMS)	leucine (2TMS)	12.387	158
isoleucine (2TMS)	isoleucine (2TMS)	13.292	158	3	P		27018	35809	34724	14959	15235	15391	16013	15888	16496	16992	18038	18472	24135	22763	24569	18598	18753	16086		7227	18550	18214	19214	23023	22260	13482	13820	13726	14262	12800	12877	11399	5362	6864	8477	5647	7110	8053		isoleucine (2TMS)	isoleucine (2TMS)	13.033	158
glycine (3TMS)	glycine TMS derivative 2 (out of 2 potential)	13.435	174	3	P		68448	72103	68707	33924	35942	33056	38990	37735	37779	42425	43740	40591	114118	106698	115457	88406	82767	69964		33288	58590	59516	59808	58937	58692	43412	42944	43597	46821	43138	43957	44767	98337	73468	96151	86053	70886	87919		glycine (3TMS)	glycine (3TMS)	13.19	174
serine (2TMS)	serine (2TMS)	14.05	116	3	NQ (small peak)																					10245	17144	18582	17207	15842	17303	10039	10379	10275	10943	10729	10956	12036	19715	15071	20884	19817	12802	16830		serine (2TMS)	serine (2TMS)	13.85	116
proline (1TMS)	proline (1TMS)	14.318	142+216	1	P		25979	42003	39891	16366	16204	16979	16859	18298	17685	18214	19625	20299	24600	23070	25037	17124	17981	14057		2085	6301	5897	4433	5627	4680	5570	4997	4378	3808	2616	2087	1538	778	2480	2703	408	1207	633		proline (1TMS)	proline (1TMS)	14.055	142+216
phosphate (4TMS)	phosphate	14.528	387	1	P		33600	42336	38469	9947	11535	11825	11775	12618	13181	14740	16464	16655	76299	73995	79804	61509	69121	60432		16716	48542	50858	48470	52087	50684	22296	25600	26168	30320	27514	27586	31156	32871	22365	40162	24553	17409	25695		phosphate (4TMS)	phosphate	14.302	387.5
threonine (2TMS)	threonine TMS derivative 1 (out of 3 potential)	14.689	130+219	3	P		6056	7539	9934	1773	2984	3221	3264	3852	4051	4590	5139	5529	6368	8923	7569	6177	8527	9564		5953	9011	9032	8934	7290	7819	5329	5152	5003	5614	5396	5372	6280	12286	8859	12667	10848	7139	9587		threonine (2TMS)	threonine (2TMS)	14.499	130+219
alanine (3TMS)	alanine TMS derivative 1 (out of 2 potential)	14.726	188	3	P		6357	6219	7168	1061	1354	1306	1741	1709	1796	2500	2861	3645	2536	2908	2841	1998	2282	2265		996	1738	1747	2143	2241	2130	1464	1459	1560	1956	1886	2151	2396	1048	959	1115	1288	1350	1694		alanine (3TMS)	alanine (3TMS)	14.469	188
urea (2TMS)	urea	14.881	189	1	P		41164	43630	43544	17771	18939	18452	19021	20168	20395	21518	23537	22940	33679	33648	34915	28715	28613	26534		25838	44374	45100	45849	44813	44927	27999	28129	28060	30634	27984	28666	29930	23505	20468	25645	21841	19076	23001		urea (2TMS)	urea	14.612	189
glycerate (3TMS)	glycerate	14.93	292	1	P		331	331	319	122	146	155	165	78	13	158	29	144	314	259	242	291	259	234		285	285	305	573	490	514	310	234	278	278	320	277	286	300	222	253	233	230	368		glycerate (3TMS)	glycerate	14.572	292
benzoate	benzoate	15.217	179	1	P		1099	1071	1049	445	432	374	483	398	421	554	436	465	634	701	607	577	523	503		417	649	653	520	662	561	349	359	386	370	364	350	371	475	442	530	649	603	693		benzoate (1TMS)	benzoate	14.919	179
serine (3TMS)	serine (3TMS)	15.304	204	3	P		18816	27445	26123	10615	11235	10458	11915	11302	11434	11685	12942	12624	27363	24459	27151	15519	16038	12193		7766	18598	18514	20549	25571	22661	15605	16581	16227	17071	14918	15274	14040	4364	10990	12694	6060	12618	12446		serine (3TMS)	serine (3TMS)	15.087	204
CE_Un0002 (RT:15.648/QI:199//organic acid putatively)	CE_Un0002 (RT:15.648/QI:199//organic acid putatively)	15.648	199	1	P		1124	1226	1184	missing	missing	missing	missing	missing	missing	missing	missing	missing	10475	9705	10444	9855	9762	8938		328	665	599	560	623	550	508	538	498	559	529	572	596	468	465	559	605	500	594		CE_Un0002 (organic acid)	CE_Un0002 (RT:15.648/QI:199//organic acid putatively)	15.374	199
threonine (3TMS)	threonine TMS derivative 2 (out of 3 potential)	15.703	291+218	3	P		25073	33022	30929	13296	13264	13216	14497	14882	14588	15142	16224	16079	25645	22678	25356	15400	16233	11766		8060	18326	18781	19865	24037	21666	13583	14748	14609	15815	13298	14067	12726	7305	12931	15276	7136	12308	11992		threonine (3TMS)	threonine (3TMS)	15.49	291+218
fumarate (2TMS)	fumarate	15.934	245	1	P		782	830	673	290	373	360	353	376	393	409	402	412	1779	1450	1620	1104	1246	1044		567	1443	1246	1244	1237	1003	902	739	852	819	804	964	899	630	556	770	806	632	759		fumarate (2TMS)	fumarate	15.676	245
succinate (2TMS)	succinate	16.075	247	1	P		16825	16216	16663	7243	7818	7290	8325	7875	8050	8733	8724	8838	16647	16363	16453	14625	13393	13366		4861	8522	8490	8169	7241	7593	5028	4920	4986	5546	4859	5041	5259	2694	2123	2806	3945	2948	4199		succinate (2TMS)	succinate	15.829	247
beta-alanine (3TMS)	beta-alanine (3TMS)	16.743	248	3	P		47677	48238	44516	21182	23417	20840	27309	26427	26031	29724	30448	28797	38313	37791	40370	28579	26916	22888		23407	42674	43057	43364	42338	42084	36744	37275	36954	38516	36110	35873	36755	21110	16600	22396	18792	16871	20313		beta-alanine (3TMS)	beta-alanine (3TMS)	16.51	248
A_052	A_052 (RT:17.309/QI:298)	17.309	298	1	P		653	688	785	280	271	0	286	303	267	149	379	400	691	802	818	515	726	731		336	573	594	754	796	900	381	428	423	439	494	509	461	551	557	684	600	468	601		A_052 (RT:17.309/QI:298)	A_052 (RT:17.309/QI:298)	17.065	298
homoserine (3TMS)	homoserine (3TMS)	17.553	218	3	P		1889	2561	2504	1328	1378	1251	1482	1551	1646	1540	1471	1470	2470	2411	2516	1432	1667	1145		1136	2440	2477	2400	2853	2500	1494	1561	1600	1514	1466	1582	1349	620	809	889	823	914	893		homoserine (3TMS)	homoserine (3TMS)	17.322	218
GABA (3TMS)	GABA (3TMS)	19.468	174	3	P		10501	11167	10877	5109	5471	4920	6090	6119	5989	6274	6606	6516	13089	12019	13561	8678	8801	6846		9403	16413	16009	19152	18960	18788	13088	13178	13056	14102	12961	12880	13503	9148	7287	9448	8020	7164	8455		GABA (3TMS)	GABA (3TMS)	19.229	174
malate (3TMS)	malate	19.502	245	1	P		1101	1077	1283	403	437	467	461	454	462	583	604	477	1431	1477	1395	1132	1287	1420		1545	2730	2916	2170	2114	2188	1316	1245	1357	1487	1339	1375	1508	1596	1412	1947	1523	1257	1796		malate (3TMS)	malate	19.282	245
aminomalonic acid (3TMS)	aminomalonic acid	19.6	218	3	P		581	673	629	183	183	198	239	230	170	219	257	287	1290	1133	1196	752	837	751		248	494	546	511	504	413	394	429	480	511	433	459	463	623	452	632	519	435	580		aminomalonic acid (3TMS)	aminomalonic acid	19.37	218
aspartate (3TMS)	aspartate (3TMS)	20.192	232	3	P		31362	40409	40287	16109	18140	17666	18723	19954	20087	21129	21712	22307	38914	40534	39812	30879	33973	30100		32602	56417	55658	68038	70643	70052	47105	51832	52158	50970	48987	49654	47908	16529	14699	18523	17264	14288	15929		aspartate (3TMS)	aspartate (3TMS)	19.997	232
threonate (4TMS)	threonate	20.231	292	1	P		1269	1168	1993	893	1027	1034	563	615	1124	1123	1164	1206	2408	2384	2762	3002	2905	2715		1428	2239	2145	2338	2106	2030	1148	1320	1281	1467	1316	1222	1459	1900	1538	1984	1560	1176	1525		threonate (4TMS)	threonate	20.039	292
Un_0063 (a_39;x_2;U_032)	Un_0063 (a_39/x_2/U_032// RT:20.913/QI:263)	20.913	263	1	P		7597	7735	7775	4310	4514	4608	5000	4818	4834	5203	5378	5349	8925	8627	8807	3349	3128	2932		3469	5783	5853	5955	5979	5981	3237	3175	3254	3494	3321	3322	3238	5110	4299	5841	4422	3614	4486		Un_0063 (a_39/x_2/U_032; RT:20.913/QI:263)	Un_0063 (a_39/x_2/U_032// RT:20.913/QI:263)	20.656	263
methionine (2TMS)	methionine (2TMS)	21.014	176	3	P		8630	9797	9798	3805	4167	4085	4485	4338	4584	4820	5029	5130	7708	7887	7784	5892	5991	5795		3491	5903	6304	5760	6020	6062	3886	4097	4098	4434	3721	3838	3891	2511	2170	2812	2812	2412	2830		methionine (2TMS)	methionine (2TMS)	20.768	176
cysteine NNO (3/3)	cysteine NNO (4TMS)	21.161	220	3	P		1338	1611	1531	413	540	478	577	586	607	581	559	581	1207	1266	1242	708	848	752		688	1650	1659	1108	1240	1144	750	705	701	772	724	672	658	1009	924	1246	1160	1059	1132		cysteine NNO (4TMS)	cysteine NNO (4TMS)	20.925	220
2-hydroxyglutaric acid (3TMS)	2-hydroxyglutaric acid	21.695	247	1	P		9702	10420	10502	3633	3830	4049	4351	4270	4575	4810	4985	5076	11599	11306	11385	9729	9808	9402		3358	6523	6372	6778	6762	6925	3993	4075	3991	4566	4257	4201	4569	3828	3243	4729	3257	2765	3811		2-hydroxyglutaric acid (3TMS)	2-hydroxyglutaric acid	21.465	247
putrescine (4TMS) (Un_0129)	putrescine (Un_0129)	21.895	174	1	P		82187	80592	76354	42074	43066	39429	47127	45744	45976	51193	52192	48452	98803	95015	96449	72951	68213	55644		24268	42219	42729	46106	44584	44184	32113	32086	31406	33365	30424	30441	31548	64477	51520	69638	56635	50623	62047		putrescine (4TMS) (Un_0129)	putrescine (Un_0129)	21.676	174
CE_Un0003 (potentially methacryloyl glycine 2TMS by NIST)	CE_Un0003 (potentially methacryloyl glycine 2TMS by NIST)	22.158	170	3	P		16274	19524	20128	6635	7649	7608	7959	8397	8836	8906	9294	9541	9774	10484	10800	7531	8732	7772		6813	12782	12680	13230	12879	12734	9162	9020	9007	9434	8948	9261	8743	6298	6117	7990	6580	5661	5879		CE_Un0003 (potentially methacryloyl glycine 2TMS by NIST)	CE_Un0003 (potentially methacryloyl glycine 2TMS by NIST)	21.891	170
Un_0088 (K_47;A_077)	Un_0088 (K_47/A_077// RT:22.282/QI:188)	22.282	188	1	P		1652	1705	1860	484	505	562	617	629	680	882	853	852	1637	1656	1811	955	992	930		393	817	754	624	578	631	492	435	479	565	479	550	558	309	203	339	577	592	643		Un_0088 (K_47/A_077; RT:22.282/QI:188)	Un_0088 (K_47/A_077// RT:22.282/QI:188)	22.032	188
glutamate (3TMS)	glutamate derivative 1 (out of 2 potential)	22.522	246	3	P		203682	218192	211841	83430	91705	89579	93603	97702	97296	103125	111454	107016	210864	214624	217781	168443	177891	168672		158196	292168	297411	323886	329731	333613	220416	222269	222356	236802	222686	226524	233478	146552	133938	178354	138128	113767	142231		glutamate (3TMS)	glutamate	22.296	246
pyroglutamate (2TMS)	glutamate derivative 2 (out of 2 potential)	22.913	230+156	3	P		106033	115318	113157	46284	49950	48724	53667	54252	54032	58128	59263	61151	94810	98100	97335	82059	82059	77874		93306	162365	158198	172105	170078	166546	106442	107625	105937	116772	108552	110804	116511	99278	82422	110029	91477	76464	92315		pyroglutamate (2TMS)	glutamate	22.648	230+156
phenylalanine (2TMS)	phenylalanine (2TMS)	23.628	218	3	P		33328	34950	33472	14222	15174	15453	16217	16126	17083	17715	17939	18343	31507	30593	31530	26364	27453	26050		13539	25856	26659	26835	26972	27190	17369	17912	17795	18835	17873	17872	18474	10092	9628	13578	11149	9752	12692		phenylalanine (2TMS)	phenylalanine (2TMS)	23.367	218
alpha-Ketoglutarate MeOx2 2TMS (P2400)	alpha-ketoglutarate (P2400)	23.735	292	2	P		362	304	385	missing	missing	missing	missing	missing	missing	missing	missing	missing	542	538	531	657	645	749		604	1127	1158	1108	1120	1066	538	599	586	617	548	620	653	435	313	440	412	334	460		alpha-ketoglutarate MeOx2 (2TMS) (P2400)	alpha-ketoglutarate (P2400)	23.583	292
CE_Un0004 (RT:24.276/QI:266)	CE_Un0004 (RT:24.276/QI:266)	24.276	266	1	P		5023	4396	6349	2008	2127	2003	2551	2280	2386	2742	2613	2373	2065	2836	2132	2056	1715	1338		2408	4275	4232	5369	4571	4043	3132	3077	2902	3375	2847	3173	3005	3541	2850	3717	2752	2310	2836		CE_Un0004 (RT:24.017/QI:266)	CE_Un0004 (RT:24.017/QI:266)	24.017	266
2- aminoadipinic acid (3TMS)	2- aminoadipic acid	24.628	260	3	P		122096	133182	134066	46154	50789	49651	54436	55338	57368	59915	63994	64593	95552	92966	98110	70309	77752	70497		46002	99016	102685	106370	112034	110777	70654	72815	74434	80373	75688	75929	79147	33584	31035	45991	34531	28346	36492		2- aminoadipinic acid (3TMS)	2- aminoadipic acid	24.403	260
ornithine (4TMS) (N2N5N5O2)/arginine	ornithine+arginine (4TMS)	24.944	142	3	P		37599	39372	36755	15054	17284	15688	17908	18600	17913	18775	20297	18834	27438	26769	28662	17786	18063	13657		12913	28724	28803	28887	29547	29339	17910	18464	18022	19267	18020	18042	18048	10112	9783	13507	10160	9241	11367		ornithine/arginine (4TMS)	ornithine/arginine (4TMS)	24.737	142
pyrophosphate (4TMS)	pyrophosphate	25.432	451	1	NQ (carryover)		3655	7476	3608	5338	7261	5753	5614	6386	6710	5163	7221	6885	16168	8401	18777	6976	15111	14812		9767	25599	29252	13596	21618	25575	23156	27239	30979	29165	29943	30304	31200	5231	9135	15110	11557	13212	18344		pyrophosphate (4TMS)	pyrophosphate	25.208	451
Un_0122 (sugar)	Un_0122 (A_102// RT:25.720/QI:217// sugar)	25.72	217	1	P		8379	2986	7788	4068	4275	4434	1520	4325	2220	4971	4974	5098	8657	3033	3698	10529	9682	9860		2021	3657	3336	6759	6286	6723	4087	4243	4312	4495	4183	4182	4435	3669	3093	4343	3256	2874	3654		Un_0122 (A_102; RT:25.720/QI:217; sugar)	Un_0122 (A_102// RT:25.720/QI:217// sugar)	25.529	217
sorbitol (6TMS)	sorbitol	25.759	319	1	P		6510	6610	6730	3314	3704	3370	3778	4048	4034	4271	4436	1862	6795	6645	6958	9354	9496	8085		3800	6292	6400	6605	6004	6087	3919	3773	3850	4082	3834	3583	3969	5559	4556	6334	7038	5920	6820		sorbitol (6TMS)	sorbitol	25.593	319
glycerol 3 phosphate (4TMS)	glycerol 3-phosphate	25.877	298:299	1	P		118203	133993	133015	25958	26559	31456	31806	38670	37227	38327	43342	44389	126935	137840	143988	90224	98687	93449		30128	61488	61241	56608	61564	59723	23862	27641	32402	32758	30126	60827	59719	35887	34159	45110	40032	33955	42891		glycerol 3-phosphate (4TMS)	glycerol 3-phosphate	25.67	298:299
glucose MeOx-5TMS, 1	glucose	26.244	319	2	P		76530	78977	78264	37584	39588	39168	43444	43149	43832	46805	49056	47802	81409	81035	83425	93177	85698	84005		35739	61665	59479	63732	61725	61280	41279	42154	42123	45523	41807	42404	43860	55931	45369	60498	41243	34217	42184		glucose MeOx-5TMS, 1	glucose	26.07	319
ethanolamine phosphate (1TMS)	ethanolamine-phosphate	26.264	299	1	P		15415	20012	16552	7219	7329	7478	8729	9418	10458	10949	12053	12072	14656	12278	14094	7048	7569	6899		8375	17006	17056	17959	18113	18828	13653	13216	13517	15044	13531	14228	15258	10801	9205	12955	9667	8676	11057		ethanolamine-phosphate (1TMS)	ethanolamine-phosphate	26.037	299
glucopyranose peak 1	glucopyranose peak 1	26.401	204	2	P		2051	1760	1924	missing	missing	missing	missing	missing	missing	missing	missing	missing	1407	1444	1689	1272	1420	1487		736	1390	1299	1548	1269	1377	856	818	898	1068	988	1035	1088	1663	1401	2084	1479	1209	2064		glucopyranose 1	glucose	26.205	204
glucose MeOx-5TMS, 2	glucose	26.525	319	2	P		15835	15978	15678	8008	8433	7767	8962	8763	9338	9471	9920	10296	17386	16841	17457	19765	18527	17981		6940	12090	11763	12270	11893	11837	7750	7421	7356	8519	7923	7816	8352	11469	8956	11830	8314	6507	8133		glucose MeOx-5TMS, 2	glucose	26.356	319
citrate (4TMS)	citrate	26.581	273	1	P		27663	28337	29075	10099	10659	10901	11996	12892	12619	13411	13824	13552	18466	19301	19424	15791	17127	16687		15031	27894	27826	28438	28704	27779	14561	14621	15412	16420	15893	15760	16334	20133	17537	24854	14403	11759	15278		citrate (4TMS)	citrate	26.372	273
glutamine (3TMS)	glutamine TMS derivative 2 (out of 2 potential)	26.876	156	3	P		30466	39348	42465	6618	9138	9456	10301	125962	11472	10848	12955	13406	33818	36742	38936	20087	26427	23644		15591	36115	37896	34362	36861	38848	19737	22627	24861	26349	26610	27197	29613	9697	12043	20867	15143	11902	16987		glutamine (3TMS)	glutamine (3TMS)	26.641	156
lysine (4TMS)	lysine (4TMS)	26.968	174	3	P		120839	123316	117626	49809	54153	50044	59698	59677	57980	64609	69024	64112	129123	128210	132056	82901	79227	62752		35520	88097	94736	94466	93590	95277	61592	62998	62082	67175	60435	60693	61241	80544	73623	104058	86328	77184	92165		lysine (4TMS)	lysine (4TMS)	26.759	174
myristic acid (1TMS)	myristate	27.034	285	1	P		1127	858	1305	490	531	360	566	645	599	626	641	769	437	859	423	581	556	458		729	1355	1241	1761	1537	1836	956	992	980	861	1066	927	1015	1253	1131	1252	904	788	1023		myristate (1TMS)	myristate	26.799	285
3-phosphoglycerate (3TMS)	3-phosphoglycerate	27.547	459	1	P		845	1111	1523	297	396	316	364	516	552	474	546	608	1704	1615	2507	910	1370	1230		1251	2815	3060	2087	2557	2790	917	1393	1355	1264	1461	1605	1614	1021	1180	1685	1441	1243	1660		3-phosphoglycerate (3TMS)	3-phosphoglycerate	27.336	459
Un_0055 (A_116;f_26 (MeOx1))	Un_0055 MeOx1 (A_116/f_26// RT: 27.611/QI:217// sugar)	27.611	217	2	P		3241	3321	3441	1638	1722	2170	1499	1545	2222	1874	2517	2491	3054	3227	5188	2645	3678	4221		2174	3677	4317	4137	4137	3673	2070	2012	2259	2222	2154	2192	1913	2951	2490	3336	2480	2144	2515		Un_0055 MeOx1 (A_116/f_26; RT: 27.611/QI:217; sugar)	Un_0055 MeOx1 (A_116/f_26// RT: 27.611/QI:217// sugar)	27.379	217
glucopyranose peak 2	glucopyranose peak 2	28.136	204	2	P		1523	1372	1416	0	0	409	338	296	105	318	507	114	2137	2276	2011	1334	1177	1083		446	763	825	1136	1016	1105	613	640	573	705	582	702	685	1207	1057	1442	1201	785	1434		glucopyranose 2	glucose	27.942	204
myo-inositol (6TMS)	myo-inositol	28.835	305	1	P		11580	11851	11801	4981	5290	4914	5613	5529	5584	5970	6045	6301	18553	18286	18159	17720	16732	16246		5253	8912	9512	10103	9051	9584	5686	6073	5585	6501	6064	5946	6352	8731	7001	9258	7085	5637	6957		myo-inositol (6TMS)	myo-inositol	28.643	305
Un_0134 (sugar pyranose core)	Un_0134 (P2957// sugar acid)	29.357	204	1	P		1281	1342	1466	377	490	405	566	584	518	719	767	770	1222	1290	1458	1158	1218	1107		427	680	818	882	906	752	638	532	543	735	784	782	671	457	430	736	482	355	520		Un_0134 (P2957; sugar acid)	Un_0134 (P2957// sugar acid)	29.159	204
tyrosine NO (3TMS) (3/3)	tyrosine NO (3TMS)	29.477	218	3	P		61220	64172	65520	17821	20578	20188	21511	22296	23047	23274	26159	24697	51774	51822	53828	37847	39780	37174		17017	40322	41323	41230	42790	42965	27319	28556	28195	31869	29862	29746	31254	19516	18601	31331	21752	18387	24487		tyrosine NO (3TMS)	tyrosine NO (3TMS)	29.248	218
vitamin B5 (Un_0060/P3075/a_68/unknown no 114)	vitamin B5 (Un_0060/P3075/a_68/unknown no 114)	30.583	291	1	P		808	1081	1014	279	276	239	354	293	432	351	490	507	742	929	1187	770	605	834		685	1446	1509	1236	1340	1475	609	760	715	858	848	812	988	1096	829	1427	912	644	1037		vitamin B5 (Un_0060/P3075/a_68/unknown no 114)	vitamin B5 (Un_0060/P3075/a_68/unknown no 114)	30.335	291
hexadecanoic (palmitic) acid, TMS	hexadecanoic (palmitic) acid	30.731	117	11	P		29408	28933	33379	10101	11278	10317	12483	12395	13183	14599	14269	14511	19616	23723	19865	19753	18781	18572		21789	38845	39009	48317	45471	45887	23419	24393	24583	25500	24713	24076	25972	44308	37516	48998	29617	24013	31398		hexadecanoic (palmitic) acid, TMS	hexadecanoic (palmitic) acid	30.497	117
adenine (2TMS)	adenine	31.067	264	1	NQ		338	617	592	107	49	missing	missing	missing	169	missing	268	missing	725	678	768	399	540	357		483	915	823	1101	1113	1194	779	786	796	826	834	846	914	461	484	609	360	338	436		adenine (2TMS)	adenine	30.763	264
spermidine (3TMS) (P3178)	spermidine (3TMS) (P3178)	31.583	174	3	P		871	1022	854	missing	missing	missing	missing	missing	missing	528	missing	missing	1069	1113	1170	446	666	342																						spermidine (3TMS) (P3178)	spermidine (3TMS) (P3178)	31.383	174
Un_0102 (P3188/U_062(FA?))	Un_0102 (P3188/U_062// fatty acid putatively)	31.706	327	1	P		3378	3164	5789	1848	1803	1728	1763	1974	2226	2722	2195	2243	2721	5917	3867	3252	3611	3100		2561	4006	4241	6318	5654	5470	2673	2797	3138	2582	2566	2746	3133	3525	3552	5102	3812	2976	3484		Un_0102 (P3188/U_062; fatty acid putatively)	Un_0102 (P3188/U_062// fatty acid putatively)	31.466	327
Un_0061(Heptadecanoicacid_1,P3263;no115)	Un_0061(P3263/unknown_no115, fatty acid putatively)	32.641	117	1	P		6453	6368	10831	2785	3637	3696	4185	3807	3469	3743	4402	4885	2557	4753	3363	3699	3308	3175		3857	6174	5571	10103	8590	7106	3669	3729	3939	3798	3740	4256	3490	3032	3176	4426	3329	2765	2836		Un_0061(P3263/unknown_no115; heptadecanoic acid putatively)	Un_0061(P3263/unknown_no115// heptadecanoic acid putatively)	32.401	117
octadecanoic acid (1TMS)	octadecanoic acid	34.138	117	1	P		25181	26628	34181	9805	10759	11264	12024	11690	12482	13826	12541	13161	17916	23336	20952	6838	6530	6111		17773	32849	32668	46169	42488	41555	20904	20929	21211	21968	20329	21938	22064	34062	31414	40433	22530	17332	23343		octadecanoic acid (1TMS)	octadecanoic acid	33.915	117
Un_0126 (att. not to include octad.peak)	Un_0126 (A_170// RT:34.244/QI:339)	34.244	339	1	P		6075	5572	13200	3138	3540	3422	3530	4226	4290	5169	4578	4332	5226	9360	7837	6042	6072	5842		6899	9970	9643	15695	14397	12685	6906	7829	7177	7728	7715	7752	7364	9375	10124	12531	9262	7942	8552		Un_0126 (A_170; RT:34.244/QI:339)	Un_0126 (A_170// RT:34.244/QI:339)	34.021	339
Un_0067 (unknown_P3458,phospho-compound)	Un_0067 (P3458/a70/f_37// phospho-compound)	34.378	357	1	P		6103	11575	16125	1960	3070	3261	4139	4300	5021	5085	5709	6072	17639	16167	17497	6452	8605	11220		4289	11185	11762	11923	12081	11974	7492	8087	9500	10414	9796	10793	10037	7898	6189	8939	6583	5944	7516		Un_0067 (P3458/a70/f_37; phospho-compound)	Un_0067 (P3458/a70/f_37// phospho-compound)	34.164	357
Unrev_289 (P3502// sugar phosphate)	Unrev_289 (P3502// sugar phosphate)	34.756	387	1	P		3794	4815	5426	0	1305	1402	0	0	0	1667	1722	1974	6511	6472	8505	4066	5327	5217		2783	8053	7084	6059	6994	7327	2982	4405	4414	4809	4509	4448	5049	3430	3061	5966	3530	2918	4781		Unrev_289 (P3502; sugar phosphate)	Unrev_289 (P3502// sugar phosphate)	34.579	387
glucose 6-phosphate MeOx-6TMS,1	glucose 6-phosphate	35.217	387	2	P		15765	21119	22331	3500	4507	3731	5096	5716	5901	6080	6796	7354	23826	27366	30704	14599	19864	21261		7573	22022	24255	19936	22654	23532	8696	10322	11508	12738	11884	12744	12600	12403	11248	18303	10347	7786	12307		glucose 6-phosphate MeOx-6TMS,1	glucose 6-phosphate	35.03	387
glucose 6-phosphate MeOx-6TMS, 2	glucose 6-phosphate	35.399	387	2	P		2776	17542	22786	missing	813	775	582	1083	986	997	1107	1949	21029	21210	26066	3134	20722	21586		1350	4522	4987	4134	4168	4647	1724	2345	2140	2710	1953	2549	3267	2262	2029	4287	2001	1586	2672		glucose 6-phosphate MeOx-6TMS, 2	glucose 6-phosphate	35.234	387
myo-Inositol-1-phosphate, TMS	myo-Inositol-1-phosphate	35.524	318	1	NQ (carryover)		1285	2758	1626	524	671	486	496	737	903	502	874	203	2696	1814	2684	1230	1472	1657		504	1578	1624	1151	1388	1551	993	1010	1110	1231	1268	1246	1420	906	723	1324	832	617	924		myo-Inositol-1-phosphate, TMS	myo-Inositol-1-phosphate	35.344	318
CE_Un0006 (RT:25.949/QI:117)	CE_Un0006 (RT:25.949/QI:117)	35.949	117	1	P		2727	2517	5311	916	1608	935	1771	1663	1522	1799	1851	2193	1901	3860	2856	1937	1968	1864		1451	2538	2649	3882	3544	2620	1231	1331	1529	1246	1536	1433	1229	1212	1304	2057	1345	1013	1130		CE_Un0006 (RT:35.949/QI:117)	CE_Un0006 (RT:35.949/QI:117)	35.71	117
tryptophan (3TMS)	tryptophan TMS derivative 3 (out of 3 potential)	35.986	202	3	P		22609	20070	19218	7668	7498	7888	8093	7577	7974	8507	8836	8898	10322	9020	9646	4622	5194	5036		1624	2646	3398	3363	4262	4370	2164	2997	3261	2820	3336	3602	4180	573	733	833	970	1088	2008		tryptophan (3TMS)	tryptophan (3TMS)	35.738	202
eicosanoic (arachidic) acid, TMS	eicosanoic (arachidic) acid	37.27	117	1	NQ		623	1052	2022	missing	missing	missing	530	missing	missing	564	missing	missing	missing	1454	850	missing	missing	853		586	1082	1129	1487	1393	1260	525	590	689	665	628	732	523	537	659	951	619	590	631		eicosanoic (arachidic) acid, TMS	eicosanoic (arachidic) acid	37.074	117
tryptophan (2TMS)	tryptophan TMS derivative 2 (out of 2 potential)	37.601	202	3	P		2005	3231	5032	missing	411	566	missing	missing	1580	629	1186	541	4305	4797	6627	3312	4792	4810		2082	9793	8633	8386	8185	7239	3579	3728	3921	4827	3410	3979	3707	5526	4456	8956	5852	3852	5011		tryptophan (2TMS)	tryptophan (2TMS)	37.337	202
sucrose (8TMS)	sucrose	37.999	361	1	NQ		1437	1261	1702	409	872	579	889	595	468	683	433	1158	2515	1919	2842	939	1219	1169		3696	7263	7210	43188	43567	41576	26344	26060	25698	28993	25772	26975	27532	21184	16837	24506	8722	7077	9389		sucrose (8TMS)	sucrose	37.899	361
CE_Un0007 (RT:28.152/QI:117)	CE_Un0007 (RT:28.152/QI:117)	38.152	117	1	P		4415	4727	5613	1833	1671	1919	1956	2459	2364	2174	2307	2512	4474	4801	5373	3883	3630	3812		1725	3623	3740	3490	3263	5371	1599	2171	1660	1824	2131	1833	1838	1871	1735	2777	2154	1785	2531		CE_Un0007 (RT:37.962/QI:117)	CE_Un0007 (RT:37.962/QI:117)	37.962	117
2-monopalmitin (putative by NIST)	2-monopalmitin (putative by NIST)	38.966	313	1	P		1886	2238	2063	missing	missing	missing	missing	675	798	896	missing	802	1680	1747	1942	1270	1105	1472		1244	3437	3383	3362	3492	3299	1393	1492	1540	1700	1495	1820	1771	1417	1171	1903	1598	1289	1635		2-monopalmitin (putative by NIST)	2-monopalmitin (putative by NIST)	38.78	313
CE_Un0008 (RT:29.068/QI:129)	CE_Un0008 (RT:29.068/QI:129)	39.068	129	1	P		3460	5080	4646	missing	missing	missing	missing	missing	missing	missing	1648	missing	3677	3223	3571	2702	3036	2996		2543	5673	5611	5577	5202	5278	2101	2381	2385	2620	2219	2288	2487	2559	2254	3235	2704	2069	2711		CE_Un0008 (RT:38.806/QI:129)	CE_Un0008 (RT:38.806/QI:129)	38.806	129
Un_0136 (fatty acid)	Un_0136 (P3960// fatty acid putatively)	39.398	371	1	P		298885	299268	304283	121821	126443	123946	138029	137393	141035	153724	156480	158534	193031	197771	211623	189967	186684	185694		286138	522457	523786	504839	487214	470251	311763	310492	304239	348704	311849	329808	324414	773111	632488	822752	492473	374864	481539		Un_0136 (P3960; fatty acid putatively)	Un_0136 (P3960// fatty acid putatively)	39.211	371
trehalose	trehalose	39.454	361	1	P		607695	606879	608045	248116	264764	249556	276773	270494	275062	293960	306043	298237	784346	732637	767120	693686	686419	649078		454141	813412	786001	805886	753993	738385	511351	498802	496848	569617	495751	523431	509163	857472	702550	936424	673656	523104	649138		trehalose (1TMS)	trehalose	39.343	361
glycerol monostearate (2TMS)	glycerol monostearate	42.078	399	1	P		257138	271701	283087	92039	101873	99050	110508	106995	118955	129781	133713	134031	199840	198543	203368	167875	174644	173491		278327	523174	513010	484678	465787	453742	301336	300996	299872	343198	303490	318589	321754	747160	599315	807888	474184	372336	469080		glycerol monostearate (2TMS)	glycerol monostearate	41.934	399
							Control_a_9h	Control_a_10h	Control_a_11h	Control_b_11h	Control_b_12h	Control_b_13h	Control_b_15h	Control_b_16h	Control_b_17h	Control_b_19h	Control_b_20h	Control_b_21h	tomm40 (RNAi)_1a_11h	tomm40 (RNAi)_1a_12h	tomm40 (RNAi)_1a_13h	tomm40 (RNAi)_1a_9h	atfs-1(T40)2a_10h	atfs-1(T40)2a_11h		Control_1a_11h	Control_1a_12h	Control_1a_13h	Control_2a_14h	Control_2a_15h	Control_2a_16h	Control_2b_9h	Control_2b_10h	Control_2b_11h	Control_2b_13h	Control_2b_14h	Control_2b_15h	Control_2b_16h	tomm40 (RNAi)_1_9h	tomm40 (RNAi)_1_10h	tomm40 (RNAi)_1_11h	tomm40 (RNAi)_2a_9h	tomm40 (RNAi)_2a_10h	tomm40 (RNAi)_2a_11h
ribitol, 5TMS (217 ion)	ribitol (217)	21.808	319	1	Internal Standard		11322	11084	10400	5701	5962	5854	6499	6520	6511	6891	7194	7006	7439	7051	7086	9012	8640	8025		10247	17535	17161	16064	15789	16258	10836	10947	10737	11397	10743	10859	11311	22143	17718	23844	12857	10164	13107		ribitol, 5TMS (217 ion)	ribitol (217)	21.657	319
ribitol, 5TMS (319 ion)	ribitol (319)	21.808	217	1	Internal Standard		40323	39525	37750	21170	21950	20840	23131	23938	23501	24968	26002	25709	26141	25861	26349	30317	30231	28316		36217	62388	62923	59741	58172	58800	37963	38357	38050	41048	38365	38560	40086	78029	62155	83037	46505	37972	47950		ribitol, 5TMS (319 ion)	ribitol (319)	21.657	217
[U_C13] glucose MeOx-5TMS, 1	[U_C13] glucose Meox 1	26.244	323	2	Internal Standard		18640	18744	18648	9348	10081	9218	10449	10556	10444	11614	11878	11999	13923	13601	13945	15169	15036	14308		13666	24187	24259	24216	22882	22918	14906	15357	15403	16498	14771	15725	16602	42995	36410	47512	22891	18655	22887		[U_C13] glucose MeOx-5TMS, 1	[U_C13] glucose Meox 1	26.07	323
[U_C13] glucose MeOx-5TMS, 2	[U_C13] glucose Meox 2	26.525	323	2	Internal Standard		3938	3945	3829	1829	1927	1967	2125	2153	2150	2259	2287	2415	2869	2797	2718	3283	3144	2846		2539	4692	4762	4384	4318	4299	2898	2981	2972	3155	2854	2905	2986	8615	6893	9402	4395	3549	4381		[U_C13] glucose MeOx-5TMS, 2	[U_C13] glucose Meox 2	26.356	323
QC criterion (constant experimental process conditions) = ratio of [U-13C]-glucose Meox1 vs [U-13C]-glucose Meox2							4.73337	4.75133	4.8702	5.11099	5.23145	4.68632	4.91718	4.90293	4.85767	5.14121	5.1937	4.96853	4.85291	4.86271	5.13061	4.62047	4.78244	5.02741		5.38243	5.15494	5.09429	5.52372	5.29921	5.33101	5.14355	5.15163	5.18271	5.22916	5.17554	5.41308	5.55995	4.99071	5.28217	5.05339	5.20842	5.25641	5.22415
Notes:
1. Identified compounds are supported by standard compound measurements or very high (>70%) identifications by established libraries; putative identifications refer to lower percentage in established libraries; chemical classes are identified by characteristic ions; In the case of the unknown compounds the names appearing in parenthesis have been previously used in the peak library of the lab and…
2. RT, QI stand for retention time and quantifying ion respectively.
3. Chemical Category is a number 1, 2 or 3 referring to categorization of metabolites based on their derivatization pattern as described in Kanani and Klapa (2007).
3. In some metabolites (mostly unknown), other names already used in publications of the group are provided in parenthesis to enable matching between datasets
4. A peak is defined as P if it has beed consistently quantified and included in further analysis and NQ if it has been detected in some - if not all- of the acquired metabolic profiles but cannot be accurately quantified because it is very small or bad-shaped or with significant carry-over or skewed by co-elution with another more abundant compound (i.e. not consistently detected and/or with lar…
5. The list includes only the quantifiable peaks, very small peaks and artifacts are not included
* In Sample Collection 2, tomm40(RNAi) was not divided into a, b parts, because pellet weight was small.
6. All injections of a sample are shown in this dataset; the time shown in the name of the profile depicts the derivatization time at which the injection was made (Kanani et al., 2008)
Light green background indicates the metabolite derivative peaks whose profiles were considered in the final data analysis after normalization and filtering (see Material and Methods) - included in Supp. Table S3.B (normalized dataset)
[truncated: 1 more columns]

## Sheet: B. Normalized_Metabolomic_Data
Supplementary Data 1: B. The normalized mean GC-MS metabolic profiles considered in the analyses; the profiles have been transformed -when needed - to correspond to 100 mg of worm pellet
						Collection Time 1					Collection Time 2
				Original Worm Pellet weight		100 mg		100 mg	100 mg		107mg	105.6mg		41.5mg *	69mg
Metabolite Derivative Name	Metabolite Name	RT(min)	Quan Ion	Chemical Category		Control_a	Control_b	tomm40 (RNAi)_1a	tomm40 (RNAi)_2a		Control_1a	Control_2a	Control 2b	tomm40 (RNAi)_1	tomm40 (RNAi)_2a		Metabolite Derivative Name	Metabolite Name	RT(min)	Quan Ion
2- aminoadipinic acid (3TMS)	2- aminoadipic acid	24.628	260	3		11.8969	8.62004	13.6302	13.0494		5.02171	6.48075	6.5194	4.1744	3.98976		2- aminoadipinic acid (3TMS)	2- aminoadipic acid	24.403	260
2-hydroxybutanoic acid (2TMS)	2-hydroxybutanoic acid	10.059	233	1		0.393709	0.312518	0.340963	0.336304		0.324026	0.364333	0.333636	0.280369	0.200094		2-hydroxybutanoic acid (2TMS)	2-hydroxybutanoic acid	9.825	233
2-hydroxyglutaric acid (3TMS)	2-hydroxyglutaric acid	21.695	247	1		0.935606	0.679316	1.18898	1.16863		0.333648	0.402826	0.36528	0.445174	0.394263		2-hydroxyglutaric acid (3TMS)	2-hydroxyglutaric acid	21.465	247
2-monopalmitin (putative by NIST)	2-monopalmitin (putative by NIST)	38.966	313	1		0.188952	0.0522875	0.253782	0.263793		0.160294	0.199927	0.138092	0.16859	0.181571		2-monopalmitin (putative by NIST)	2-monopalmitin (putative by NIST)	38.78	313
3-phosphoglycerate (3TMS)	3-phosphoglycerate	27.547	459	1		0.107103	0.0693212	0.285796	0.285569		0.143592	0.146299	0.118435	0.14729	0.174407		3-phosphoglycerate (3TMS)	3-phosphoglycerate	27.336	459
A_052 (RT:17.309/QI:298)	A_052 (RT:17.309/QI:298)	17.309	298	1		0.0650758	0.0397172	0.109061	0.105861		0.0311779	0.0482037	0.0386617	0.0682788	0.0669398		A_052 (RT:17.309/QI:298)	A_052 (RT:17.309/QI:298)	17.065	298
weighted sum of (alanine (2TMS), alanine (3TMS))	alanine_effective	7.830/14.726	116/188	3		68.1889	45.9431	70.5632	67.7517		13.5092	18.1188	17.346	18.621	20.135		weighted sum of (alanine (2TMS), alanine (3TMS))	alanine_effective	7.577/14.469	116/188
alpha-ketoglutarate MeOx2 (2TMS) (P2400)	alpha-ketoglutarate (P2400)	23.735	292	2		0.0321398		0.0619751	0.103105		0.0594063	0.0648603	0.0512607	0.0447903	0.04831		alpha-ketoglutarate MeOx2 (2TMS) (P2400)	alpha-ketoglutarate (P2400)	23.583	292
aminomalonic acid (3TMS)	aminomalonic acid	19.6	218	3		0.057505	0.0336942	0.158666	0.10172		0.0262277	0.0281358	0.039042	0.0643789	0.0615538		aminomalonic acid (3TMS)	aminomalonic acid	19.37	218
aspartate (3TMS)	aspartate (3TMS)	20.192	232	3		3.42982	3.02007	4.85631	4.49352		3.00383	4.10934	4.29923	1.88989	1.91489		aspartate (3TMS)	aspartate (3TMS)	19.997	232
benzoate (1TMS)	benzoate	15.217	179	1		0.0981863	0.0690886	0.0984347	0.0815958		0.0360617	0.0343449	0.03143	0.055121	0.0785884		benzoate (1TMS)	benzoate	14.919	179
beta-alanine (3TMS)	beta-alanine (3TMS)	16.743	248	3		4.28114	4.01251	5.57379	5.26925		2.25138	2.51561	3.18337	2.27271	2.25666		beta-alanine (3TMS)	beta-alanine (3TMS)	16.51	248
CE_Un0001 (putatively 2-amino butyric acid by NIST )	CE_Un0001 (putatively 2-amino butyric acid by NIST )	9.91	130	1		1.68505	1.40205	1.48471	1.6964		0.461616	0.649468	0.570311	0.354398	0.302363		CE_Un0001 (putatively 2-amino butyric acid by NIST )	CE_Un0001 (putatively 2-amino butyric acid by NIST )	9.656	130
CE_Un0002 (RT:15.648/QI:199//organic acid putatively)	CE_Un0002 (RT:15.648/QI:199//organic acid putatively)	15.648	199	1		0.107911		1.3563	1.49275		0.0326599	0.0341376	0.0468161	0.0568867	0.0683906		CE_Un0002 (RT:15.648/QI:199//organic acid putatively)	CE_Un0002 (RT:15.648/QI:199//organic acid putatively)	15.374	199
CE_Un0003 (potentially methacryloyl glycine 2TMS by NIST)	CE_Un0003 (potentially methacryloyl glycine 2TMS by NIST)	22.158	170	3		1.71141	1.28469	1.40907	1.41054		0.664394	0.764684	0.783934	0.774908	0.732989		CE_Un0003 (potentially methacryloyl glycine 2TMS by NIST)	CE_Un0003 (potentially methacryloyl glycine 2TMS by NIST)	21.891	170
CE_Un0004 (RT:24.276/QI:266)	CE_Un0004 (RT:24.276/QI:266)	24.276	266	1		0.483579	0.362183	0.308244	0.200372		0.225981	0.275381	0.265072	0.382857	0.317726		CE_Un0004 (RT:24.276/QI:266)	CE_Un0004 (RT:24.276/QI:266)	24.017	266
CE_Un0006 (RT:25.949/QI:117)	CE_Un0006 (RT:25.949/QI:117)	35.949	117	1		0.326205	0.242534	0.365586	0.268272		0.137291	0.198002	0.117765	0.172371	0.140334		CE_Un0006 (RT:25.949/QI:117)	CE_Un0006 (RT:25.949/QI:117)	35.71	117
CE_Un0007 (RT:28.152/QI:117)	CE_Un0007 (RT:28.152/QI:117)	38.152	117	1		0.452044	0.329502	0.649115	0.529144		0.184702	0.238093	0.16101	0.240068	0.259062		CE_Un0007 (RT:28.152/QI:117)	CE_Un0007 (RT:28.152/QI:117)	37.962	117
CE_Un0008 (RT:29.068/QI:129)	CE_Un0008 (RT:29.068/QI:129)	39.068	129	1		0.40355	0.0254533	0.506068	0.551881		0.279955	0.316062	0.202995	0.303981	0.29986		CE_Un0008 (RT:29.068/QI:129)	CE_Un0008 (RT:29.068/QI:129)	38.806	129
citrate (4TMS)	citrate	26.581	273	1		2.59851	1.88719	3.0281	3.37271		1.45766	1.672	1.34339	2.36255	1.66319		citrate (4TMS)	citrate	26.372	273
cysteine NNO (4TMS)	cysteine NNO (4TMS)	21.161	220	3		0.136911	0.0846115	0.183971	0.145513		0.0803464	0.0687737	0.06143	0.120461	0.135643		cysteine NNO (4TMS)	cysteine NNO (4TMS)	20.925	220
ethanolamine (3TMS)	ethanolamine 3TMS	11.181	174	3		0.261511	0.270959	0.241188	0.2477		0.14057	0.14548	0.162263	0.164775	0.113445		ethanolamine (3TMS)	ethanolamine 3TMS	10.938	174
ethanolamine-phosphate (1TMS)	ethanolamine-phosphate	26.264	299	1		1.58618	1.46158	2.72117	2.85584		0.866363	1.08057	1.21278	1.24549	1.18313		ethanolamine-phosphate (1TMS)	ethanolamine-phosphate	26.037	299
fumarate (2TMS)	fumarate	15.934	245	1		0.0695544	0.0579235	0.179762	0.16183		0.0654929	0.0686486	0.0737358	0.0739961	0.0882985		fumarate (2TMS)	fumarate	15.676	245
GABA (3TMS)	GABA (3TMS)	19.468	174	3		0.993613	0.912048	1.63284	1.64629		0.868075	1.12017	1.14331	0.980443	0.953478		GABA (3TMS)	GABA (3TMS)	19.229	174
glucose Meox1+ glucopyranose 1+ glucopyranose 2	glucose_total	26.244/26.401/28.136	319/204/204	2		7.44317	6.7454	8.99105	7.59954		3.37454	3.82274	3.82521	6.45781	5.0552		glucose Meox1+ glucopyranose 1+ glucopyranose 2	glucose_total	26.070/26.205/27.942	319/204/204
glucose-6P MeOx1	glucose-6P MeOx1	35.217	387	2		1.815	0.827889	3.20603	2.23033		1.06178	1.30153	0.991429	1.57637	1.21245		glucose-6P MeOx1	glucose-6P MeOx1	35.03	387
weighted sum of (glutamate (3TMS), pyroglutamate (2TMS)) + glutamine (3TMS)	glutamate_effective + glutamine (3TMS)	22.522/22.913/26.876	246/(230+156)/156	3		41.9809	34.6269	55.5636	52.6828		25.5875	31.5261	31.2539	29.5264	27.5189		weighted sum of (glutamate (3TMS), pyroglutamate (2TMS)) + glutamine (3TMS)	glutamate_effective + glutamine (3TMS)	22.296/22.648/26.641	246/(230+156)/156
glycerate (3TMS)	glycerate	14.93	292	1		0.0299237	0.0176919	0.0453558	0.042202		0.0192645	0.0310351	0.0244655	0.0294687	0.0332502		glycerate (3TMS)	glycerate	14.572	292
glycerol (3TMS)	glycerol	11.961	205	1		1.66028	1.31769	4.91154	4.72316		2.67021	2.28195	2.93642	8.4703	9.03971		glycerol (3TMS)	glycerol	11.743	205
glycerol 3-phosphate (4TMS)	glycerol 3-phosphate	25.877	298:299	1		11.773	5.42738	14.4981	13.2891		3.12006	3.50269	3.28797	4.36988	4.6989		glycerol 3-phosphate (4TMS)	glycerol 3-phosphate	25.67	298:299
glycerol monostearate (2TMS)	glycerol monostearate	42.078	399	1		24.8147	17.5985	30.2673	32.153		27.0691	27.6456	26.9726	81.4859	52.8032		glycerol monostearate (2TMS)	glycerol monostearate	41.934	399
weighted sum of (glycine (2TMS), glycine (3TMS))	glycine_effective	8.790/13.435	102/174	3		9.82524	8.09924	18.2118	18.5094		3.11767	3.38561	3.80413	9.25436	9.59876		weighted sum of (glycine (2TMS), glycine (3TMS))	glycine_effective	8.681/13.190	102/174
homoserine (3TMS)	homoserine (3TMS)	17.553	218	3		0.212889	0.22603	0.311652	0.231401		0.122851	0.152736	0.130376	0.0891113	0.10728		homoserine (3TMS)	homoserine (3TMS)	17.322	218
isoleucine (2TMS)	isoleucine (2TMS)	13.292	158	3		2.98529	2.53917	3.28354	3.37968		1.29292	1.4975	1.53168	1.47086	1.5264		weighted sum of (isoleucine (1TMS), isoleucine (2TMS))	isoleucine_effective	11.676/13.033	86/158
lactate (2TMS)	lactate	7.021	117	1		7.96196	5.94786	11.3824	11.6305		3.48441	3.1948	2.58657	6.2514	5.9276		lactate (2TMS)	lactate	6.751	117
leucine (2TMS)	leucine (2TMS)	12.627	158	3		5.37465	4.74243	5.38193	5.93446		1.76057	2.60795	2.23569	1.3148	1.40243		leucine (2TMS)	leucine (2TMS)	12.387	158
lysine (4TMS)	lysine (4TMS)	26.968	174	3		11.0362	9.08152	19.8199	15.9387		4.36476	5.57717	5.37662	9.76452	10.3092		lysine (4TMS)	lysine (4TMS)	26.759	174
malate (3TMS)	malate	19.502	245	1		0.105926	0.074659	0.15907	0.179102		0.148406	0.127385	0.11859	0.187491	0.183167		malate (3TMS)	malate	19.282	245
methionine (2TMS)	methionine (2TMS)	21.014	176	3		0.862745	0.694933	0.814968	0.769772		0.325443	0.351233	0.344616	0.284182	0.324607		methionine (2TMS)	methionine (2TMS)	20.768	176
myo-inositol (6TMS)	myo-inositol	28.835	305	1		1.07557	0.863969	1.90685	1.83835		0.490704	0.56555	0.519978	0.945951	0.790556		myo-inositol (6TMS)	myo-inositol	28.643	305
myristate (1TMS)	myristate	27.034	285	1		0.10081	0.0893593	0.126668	0.0942879		0.0687638	0.100978	0.0838734	0.138898	0.109126		myristate (1TMS)	myristate	26.799	285
octadecanoic acid (1TMS)	octadecanoic acid	34.138	117	1		2.6377	1.84855	3.2119	2.92708		1.71695	2.56346	1.84081	4.02169	2.5307		octadecanoic acid (1TMS)	octadecanoic acid	33.915	117
ornithine/arginine (4TMS)	ornithine+arginine (4TMS)	24.944	142	3		3.46905	2.75702	4.68256	3.73585		1.42575	1.72797	1.57508	1.26529	1.23994		ornithine/arginine (4TMS)	ornithine+arginine (4TMS)	24.737	142
phenylalanine (2TMS)	phenylalanine (2TMS)	23.628	218	3		3.1051	2.55049	2.8256	2.79569		1.35491	1.59444	1.55464	1.25993	1.35022		phenylalanine (2TMS)	phenylalanine (2TMS)	23.367	218
phosphate (4TMS)	phosphate	14.528	387	1		3.49539	2.03065	5.32723	4.21272		2.29383	2.97782	2.34708	3.55914	2.69706		phosphate (4TMS)	phosphate	14.302	387
proline (1TMS)	proline (1TMS)	14.318	142+216	1		3.30658	2.7638	3.0344	3.65587		0.28238	0.290469	0.308989	0.231701	0.0960294		proline (1TMS)	proline (1TMS)	14.055	142+216
putrescine (4TMS) (Un_0129)	putrescine (Un_0129)	21.895	174	1		7.2906	7.14081	13.8245	11.2807		2.26352	2.65516	2.72884	7.02023	6.82101		putrescine (4TMS) (Un_0129)	putrescine (Un_0129)	21.676	174
pyruvate (2TMS)	pyruvate	9.442	174	1		0.148026	0.0977372	0.195627	0.154875		0.0232524	0.0223269	0.0186512	0.105593	0.10234		pyruvate (2TMS)	pyruvate	9.166	174
serine (3TMS)	serine (3TMS)	15.304	204	3		2.21661	1.7947	4.1554	3.54673		2.00919	2.37407	2.28181	3.80822	3.75952		weighted sum of (serine (2TMS), serine (3TMS))	serine_effective	13.850/15.087	116/204
sorbitol (6TMS)	sorbitol	25.759	319	1		0.606152	0.566909	0.766064	0.661478		0.34349	0.368003	0.332901	0.621553	0.797192		sorbitol (6TMS)	sorbitol	25.593	319
Spermidine (3TMS) (P3178)	spermidine (3TMS) (P3178)	31.583	174	3		0.0837501	0.00851352	0.184946	0.118349								spermidine (3TMS) (P3178)	spermidine (3TMS) (P3178)	31.583	174
succinate (2TMS)	succinate	16.075	247	1		1.51709	1.25486	1.32854	1.30456		0.453305	0.452705	0.439111	0.288488	0.443113		succinate (2TMS)	succinate	15.829	247
threonate (4TMS)	threonate	20.231	292	1		0.136365	0.150669	0.216528	0.191539		0.12213	0.127458	0.113443	0.205476	0.170718		threonate (4TMS)	threonate	20.039	292
weighted sum of (threonine (2TMS), threonine (3TMS))	threonine_effective	14.689/15.703	(130+219)/(291+218)	3		3.86095	3.18575	5.51289	5.36809		1.5645	1.74035	1.68811	3.3604	2.97478		weighted sum of (threonine (2TMS), threonine (3TMS))	threonine_effective	14.499/15.490	(130+219)/(291+218)
trehalose (1TMS)	trehalose	39.454	361	2		55.6308	42.7387	106.175	100.413		42.5261	45.2457	44.4227	94.4972	74.1007		trehalose (1TMS)	trehalose	39.343	361
weighted sum of (tryptophan (2TMS), tryptophan (3TMS))	tryptophan_effective	37.601/35.986	202/202	3		2.3994	1.3692	2.3442	2.15952		0.617607	0.763107	0.606436	0.986963	0.878293		weighted sum of (tryptophan (2TMS), tryptophan (3TMS))	tryptophan_effective	37.337/35.738	202/202
tyrosine NO (3TMS)	tyrosine NO (3TMS)	29.477	218	3		5.83226	3.42601	7.39332	6.53568		1.98385	2.49982	2.5479	2.60658	2.59377		tyrosine NO (3TMS)	tyrosine NO (3TMS)	29.248	218
Un_0017 (P1091/C_041)	Un_0017 (P1091/C_041)	10.777	220	1		1.13595	1.27802	2.22728	1.76986		0.905476	1.03755	1.39981	1.76283	1.71751		Un_0017 (P1091/C_041)	Un_0017 (P1091/C_041)	10.496	220
Un_0055 MeOx1 (A_116/f_26// RT: 27.611/QI:217// sugar)	Un_0055 MeOx1 (A_116/f_26// RT: 27.611/QI:217// sugar)	27.611	217	2		0.305581	0.303677	0.347876	0.58511		0.209786	0.235312	0.182856	0.332301	0.287784		Un_0055 MeOx1 (A_116/f_26// RT: 27.611/QI:217// sugar)	Un_0055 MeOx1 (A_116/f_26// RT: 27.611/QI:217// sugar)	27.379	217
Un_0061(P3263/unknown_no115, fatty acid putatively)	Un_0061(P3263/unknown_no115, fatty acid putatively)	32.641	117	1		0.728639	0.593652	0.775577	0.406185		0.328078	0.508222	0.328458	0.403056	0.361032		Un_0061(P3263/unknown_no115, fatty acid putatively)	Un_0061(P3263/unknown_no115, fatty acid putatively)	32.401	117
Un_0063 (a_39/x_2/U_032// RT:20.913/QI:263)	Un_0063 (a_39/x_2/U_032// RT:20.913/QI:263)	20.913	263	1		0.705481	0.757459	1.08498	0.336578		0.314455	0.352672	0.284053	0.577008	0.503268		Un_0063 (a_39/x_2/U_032// RT:20.913/QI:263)	Un_0063 (a_39/x_2/U_032// RT:20.913/QI:263)	20.656	263
Un_0067 (P3458/a70/f_37// phospho-compound)	Un_0067 (P3458/a70/f_37// phospho-compound)	34.378	357	1		1.04461	0.6535	2.81305	2.50838		0.542623	0.708292	0.81464	0.868179	0.806889		Un_0067 (P3458/a70/f_37// phospho-compound)	Un_0067 (P3458/a70/f_37// phospho-compound)	34.164	357
Un_0088 (K_47/A_077// RT:22.282/QI:188)	Un_0088 (K_47/A_077// RT:22.282/QI:188)	22.282	188	1		0.159527	0.103292	0.27486	0.248233		0.0401502	0.0360682	0.0438172	0.0318309	0.0735173		Un_0088 (K_47/A_077// RT:22.282/QI:188)	Un_0088 (K_47/A_077// RT:22.282/QI:188)	22.032	188
Un_0102 (P3188/U_062// fatty acid putatively)	Un_0102 (P3188/U_062// fatty acid putatively)	31.706	327	1		0.380149	0.317549	0.541337	0.296077		0.226017	0.343387	0.242115	0.460756	0.413093		Un_0102 (P3188/U_062// fatty acid putatively)	Un_0102 (P3188/U_062// fatty acid putatively)	31.466	327
Un_0122 (A_102// RT:25.720/QI:217// sugar)	Un_0122 (A_102// RT:25.720/QI:217// sugar)	25.72	217	1		0.586102	0.618518	0.621279	0.769891		0.186971	0.389015	0.36896	0.419603	0.393619		Un_0122 (A_102// RT:25.720/QI:217// sugar)	Un_0122 (A_102// RT:25.720/QI:217// sugar)	25.529	217
Un_0126 (A_170// RT:34.244/QI:339)	Un_0126 (A_170// RT:34.244/QI:339)	34.244	339	1		0.769501	0.620417	1.22219	0.67889		0.561919	0.842518	0.646925	1.22114	1.0407		Un_0126 (A_170// RT:34.244/QI:339)	Un_0126 (A_170// RT:34.244/QI:339)	34.021	339
Un_0134 (P2957// sugar acid)	Un_0134 (P2957// sugar acid)	29.357	204	1		0.12506	0.0882866	0.150833	0.120072		0.0399117	0.0500446	0.0577453	0.0608634	0.0541497		Un_0134 (P2957// sugar acid)	Un_0134 (P2957// sugar acid)	29.159	204
Un_0136 (P3960// fatty acid putatively)	Un_0136 (P3960// fatty acid putatively)	39.398	371	1		27.5522	21.601	31.0061	32.4079		27.4894	28.7907	27.6173	84.4318	54.0698		Un_0136 (P3960// fatty acid putatively)	Un_0136 (P3960// fatty acid putatively)	39.211	371
Unrev_289 (P3502// sugar phosphate)	Unrev_289 (P3502// sugar phosphate)	34.756	387	1		0.430414	0.135713	0.756914	0.602889		0.356274	0.401141	0.376941	0.464156	0.447545		Unrev_289 (P3502// sugar phosphate)	Unrev_289 (P3502// sugar phosphate)	34.579	387
urea (2TMS)	urea	14.881	189	1		3.91966	3.14077	4.61737	4.52238		2.39258	2.66912	2.48181	2.64438	2.5751		urea (2TMS)	urea	14.612	189
weighted sum of (valine (2TMS), valine (3TMS))	valine_effective	10.970/11.652	144/(188+216+172)	3		5.91069	3.80353	5.9529	7.00852		2.32702	2.64719	2.65427	2.90848	2.66591		weighted sum of (valine (1TMS), valine (2TMS), valine (3TMS))	valine_effective	8.925/10.723/11.383	72/144/(188+216+172)
vitamin B5 (Un_0060/P3075/a_68/unknown no 114)	vitamin B5 (Un_0060/P3075/a_68/unknown no 114)	30.583	291	1		0.0887978	0.0548035	0.139795	0.154439		0.0739079	0.0797146	0.068799	0.125408	0.103098		vitamin B5 (Un_0060/P3075/a_68/unknown no 114)	vitamin B5 (Un_0060/P3075/a_68/unknown no 114)	30.335	291
					Total RPA	369.127	277.848	503.78	480.292		203.42	231.311	225.008	417.633	332.469
Notes:
1. RT, QI stand for retention time and quantifying ion respectively.
2. Chemical Category is a number 1, 2 or 3 referring to categorization of metabolites based on their derivatization pattern as described in Kanani and Klapa (2007).
3. In some metabolites (mostly unknown), other names already used in publications of the group are provided in parenthesis to enable matching between datasets
4. For metabolites for which an effective relative peak area has been estimated based on a weighted summation of multiple derivatives, the RTs and Qis of these derivatives are shown in the RT and QI cell respectively (separated by /)
* In Sample Collection 2, tomm40(RNAi) was not divided into a, b parts, because pellet weight was small.
5. The peak areas are normalized with respect to the peak area of ribitol marker ion 319 in the respective sample

## Sheet: C.%Fraction_over_total_RPA
Supplementary Data 1: C. The % fraction of each metabolite in the total quantified RPA
						Collection Time 1					Collection Time 2
				Original Worm Pellet weight		100 mg		100 mg	100 mg		107mg	105.6mg		41.5mg *	69mg
Metabolite Derivative Name	Metabolite Name	RT(min)	Quan Ion	Chemical Category		Control_a	Control_b	tomm40 (RNAi)_1a	tomm40 (RNAi)_2a		Control_1a	Control_2a	Control 2b	tomm40 (RNAi)_1	tomm40 (RNAi)_2a		Metabolite Derivative Name	Metabolite Name	RT(min)	Quan Ion
2- aminoadipinic acid (3TMS)	2- aminoadipic acid	24.628	260	3		0.0322297	0.0310243	0.0270558	0.0271696		0.0246864	0.0280175	0.0289741	0.00999537	0.0120004		2- aminoadipinic acid (3TMS)	2- aminoadipic acid	24.403	260
2-hydroxybutanoic acid (2TMS)	2-hydroxybutanoic acid	10.059	233	1		0.00106659	0.00112478	0.00067681	0.000700206		0.00159289	0.00157508	0.00148278	0.000671329	0.000601842		2-hydroxybutanoic acid (2TMS)	2-hydroxybutanoic acid	9.825	233
2-hydroxyglutaric acid (3TMS)	2-hydroxyglutaric acid	21.695	247	1		0.00253464	0.00244493	0.00236012	0.00243316		0.0016402	0.00174149	0.00162341	0.00106594	0.00118586		2-hydroxyglutaric acid (3TMS)	2-hydroxyglutaric acid	21.465	247
2-monopalmitin (putative by NIST)	2-monopalmitin (putative by NIST)	38.966	313	1		0.000511889	0.000188188	0.000503755	0.000549233		0.000787993	0.000864322	0.00061372	0.00040368	0.00054613		2-monopalmitin (putative by NIST)	2-monopalmitin (putative by NIST)	38.78	313
3-phosphoglycerate (3TMS)	3-phosphoglycerate	27.547	459	1		0.000290153	0.000249494	0.000567303	0.000594574		0.000705892	0.000632475	0.00052636	0.000352678	0.000524582		3-phosphoglycerate (3TMS)	3-phosphoglycerate	27.336	459
A_052 (RT:17.309/QI:298)	A_052 (RT:17.309/QI:298)	17.309	298	1		0.000176296	0.000142946	0.000216485	0.000220409		0.000153268	0.000208393	0.000171824	0.00016349	0.000201341		A_052 (RT:17.309/QI:298)	A_052 (RT:17.309/QI:298)	17.065	298
weighted sum of (alanine (2TMS), alanine (3TMS))	alanine_effective	7.830/14.726	116/188	3		0.18473	0.165353	0.140067	0.141064		0.0664104	0.078331	0.0770907	0.044587	0.060562		weighted sum of (alanine (2TMS), alanine (3TMS))	alanine_effective	7.577/14.469	116/188
alpha-ketoglutarate MeOx2 (2TMS) (P2400)	alpha-ketoglutarate (P2400)	23.735	292	2		8.70696e-05		0.00012302	0.000214671		0.000292038	0.000280403	0.000227817	0.000107248	0.000145307		alpha-ketoglutarate MeOx2 (2TMS) (P2400)	alpha-ketoglutarate (P2400)	23.583	292
aminomalonic acid (3TMS)	aminomalonic acid	19.6	218	3		0.000155786	0.000121269	0.000314951	0.000211788		0.000128934	0.000121636	0.000173514	0.000154152	0.000185141		aminomalonic acid (3TMS)	aminomalonic acid	19.37	218
aspartate (3TMS)	aspartate (3TMS)	20.192	232	3		0.0092917	0.0108695	0.00963973	0.00935579		0.0147666	0.0177654	0.019107	0.00452524	0.0057596		aspartate (3TMS)	aspartate (3TMS)	19.997	232
benzoate (1TMS)	benzoate	15.217	179	1		0.000265996	0.000248657	0.000195392	0.000169888		0.000177277	0.000148479	0.000139684	0.000131984	0.000236378		benzoate (1TMS)	benzoate	14.919	179
beta-alanine (3TMS)	beta-alanine (3TMS)	16.743	248	3		0.011598	0.0144414	0.0110639	0.0109709		0.0110676	0.0108754	0.0141478	0.00544188	0.00678756		beta-alanine (3TMS)	beta-alanine (3TMS)	16.51	248
CE_Un0001 (putatively 2-amino butyric acid by NIST )	CE_Un0001 (putatively 2-amino butyric acid by NIST )	9.91	130	1		0.00456495	0.0050461	0.00294714	0.00353201		0.00226927	0.00280777	0.00253463	0.000848588	0.000909447		CE_Un0001 (putatively 2-amino butyric acid by NIST )	CE_Un0001 (putatively 2-amino butyric acid by NIST )	9.656	130
CE_Un0002 (RT:15.648/QI:199//organic acid putatively)	CE_Un0002 (RT:15.648/QI:199//organic acid putatively)	15.648	199	1		0.00029234		0.00269224	0.003108		0.000160554	0.000147583	0.000208065	0.000136212	0.000205705		CE_Un0002 (RT:15.648/QI:199//organic acid putatively)	CE_Un0002 (RT:15.648/QI:199//organic acid putatively)	15.374	199
CE_Un0003 (potentially methacryloyl glycine 2TMS by NIST)	CE_Un0003 (potentially methacryloyl glycine 2TMS by NIST)	22.158	170	3		0.00463636	0.00462371	0.00279699	0.00293684		0.00326612	0.00330587	0.00348403	0.00185548	0.00220468		CE_Un0003 (potentially methacryloyl glycine 2TMS by NIST)	CE_Un0003 (potentially methacryloyl glycine 2TMS by NIST)	21.891	170
CE_Un0004 (RT:24.276/QI:266)	CE_Un0004 (RT:24.276/QI:266)	24.276	266	1		0.00131006	0.00130353	0.000611863	0.000417187		0.00111091	0.00119052	0.00117806	0.00091673	0.000955655		CE_Un0004 (RT:24.276/QI:266)	CE_Un0004 (RT:24.276/QI:266)	24.017	266
CE_Un0006 (RT:25.949/QI:117)	CE_Un0006 (RT:25.949/QI:117)	35.949	117	1		0.00088372	0.000872903	0.000725685	0.000558561		0.000674913	0.000855998	0.000523381	0.000412733	0.000422096		CE_Un0006 (RT:25.949/QI:117)	CE_Un0006 (RT:25.949/QI:117)	35.71	117
CE_Un0007 (RT:28.152/QI:117)	CE_Un0007 (RT:28.152/QI:117)	38.152	117	1		0.00122463	0.00118591	0.00128849	0.00110171		0.000907983	0.00102932	0.000715577	0.00057483	0.000779206		CE_Un0007 (RT:28.152/QI:117)	CE_Un0007 (RT:28.152/QI:117)	37.962	117
CE_Un0008 (RT:29.068/QI:129)	CE_Un0008 (RT:29.068/QI:129)	39.068	129	1		0.00109325	9.16089e-05	0.00100454	0.00114905		0.00137624	0.00136639	0.000902167	0.000727865	0.00090192		CE_Un0008 (RT:29.068/QI:129)	CE_Un0008 (RT:29.068/QI:129)	38.806	129
citrate (4TMS)	citrate	26.581	273	1		0.00703961	0.00679219	0.00601075	0.00702221		0.00716578	0.00722837	0.0059704	0.00565699	0.00500255		citrate (4TMS)	citrate	26.372	273
cysteine NNO (4TMS)	cysteine NNO (4TMS)	21.161	220	3		0.000370905	0.000304525	0.000365181	0.000302967		0.000394978	0.000297321	0.000273013	0.000288438	0.000407986		cysteine NNO (4TMS)	cysteine NNO (4TMS)	20.925	220
ethanolamine (3TMS)	ethanolamine 3TMS	11.181	174	3		0.000708457	0.000975207	0.000478756	0.000515728		0.000691032	0.000628937	0.000721145	0.000394544	0.00034122		ethanolamine (3TMS)	ethanolamine 3TMS	10.938	174
ethanolamine-phosphate (1TMS)	ethanolamine-phosphate	26.264	299	1		0.0042971	0.00526035	0.0054015	0.00594605		0.00425899	0.00467148	0.00538995	0.00298226	0.00355862		ethanolamine-phosphate (1TMS)	ethanolamine-phosphate	26.037	299
fumarate (2TMS)	fumarate	15.934	245	1		0.000188429	0.000208472	0.000356825	0.00033694		0.000321959	0.00029678	0.000327703	0.00017718	0.000265584		fumarate (2TMS)	fumarate	15.676	245
GABA (3TMS)	GABA (3TMS)	19.468	174	3		0.00269179	0.00328255	0.00324117	0.00342769		0.0042674	0.00484268	0.00508118	0.00234762	0.00286787		GABA (3TMS)	GABA (3TMS)	19.229	174
glucose Meox1+ glucopyranose 1+ glucopyranose 2	glucose_total	26.244/26.401/28.136	319/204/204	2		0.0201642	0.0242773	0.0178472	0.0158227		0.016589	0.0165264	0.0170004	0.0154629	0.015205		glucose Meox1+ glucopyranose 1+ glucopyranose 2	glucose_total	26.070/26.205/27.942	319/204/204
glucose-6P MeOx1	glucose-6P MeOx1	35.217	387	2		0.00491699	0.00297965	0.00636394	0.0046437		0.00521964	0.00562674	0.0044062	0.00377453	0.00364681		glucose-6P MeOx1	glucose-6P MeOx1	35.03	387
weighted sum of (glutamate (3TMS), pyroglutamate (2TMS)) + glutamine (3TMS)	glutamate_effective + glutamine (3TMS)	22.522/22.913/26.876	246/(230+156)/156	3		0.11373	0.124626	0.110293	0.109689		0.125786	0.136293	0.138901	0.0706994	0.0827714		weighted sum of (glutamate (3TMS), pyroglutamate (2TMS)) + glutamine (3TMS)	glutamate_effective + glutamine (3TMS)	22.296/22.648/26.641	246/(230+156)/156
glycerate (3TMS)	glycerate	14.93	292	1		8.1066e-05	6.3675e-05	9.00309e-05	8.78674e-05		9.47031e-05	0.00013417	0.000108732	7.05613e-05	0.00010001		glycerate (3TMS)	glycerate	14.572	292
glycerol (3TMS)	glycerol	11.961	205	1		0.00449785	0.00474248	0.00974936	0.00983392		0.0131266	0.00986526	0.0130503	0.0202817	0.0271896		glycerol (3TMS)	glycerol	11.743	205
glycerol 3-phosphate (4TMS)	glycerol 3-phosphate	25.877	298:299	1		0.031894	0.0195336	0.0287786	0.0276688		0.015338	0.0151428	0.0146127	0.0104634	0.0141333		glycerol 3-phosphate (4TMS)	glycerol 3-phosphate	25.67	298:299
glycerol monostearate (2TMS)	glycerol monostearate	42.078	399	1		0.0672253	0.0633387	0.0600803	0.0669446		0.13307	0.119517	0.119874	0.195114	0.158821		glycerol monostearate (2TMS)	glycerol monostearate	41.934	399
weighted sum of (glycine (2TMS), glycine (3TMS))	glycine_effective	8.790/13.435	102/174	3		0.0266175	0.02915	0.0361502	0.0385378		0.0153263	0.0146366	0.0169067	0.0221591	0.0288711		weighted sum of (glycine (2TMS), glycine (3TMS))	glycine_effective	8.681/13.190	102/174
homoserine (3TMS)	homoserine (3TMS)	17.553	218	3		0.000576735	0.000813504	0.000618626	0.000481793		0.000603927	0.000660306	0.000579429	0.000213372	0.000322675		homoserine (3TMS)	homoserine (3TMS)	17.322	218
isoleucine (2TMS)	isoleucine (2TMS)	13.292	158	3		0.00808742	0.0091387	0.0065178	0.00703671		0.0063559	0.00647395	0.00680725	0.0035219	0.00459109		weighted sum of (isoleucine (1TMS), isoleucine (2TMS))	isoleucine_effective	11.676/13.033	86/158
lactate (2TMS)	lactate	7.021	117	1		0.0215697	0.0214069	0.022594	0.0242154		0.0171291	0.0138117	0.0114955	0.0149686	0.017829		lactate (2TMS)	lactate	6.751	117
leucine (2TMS)	leucine (2TMS)	12.627	158	3		0.0145604	0.0170685	0.0106831	0.0123559		0.00865484	0.0112746	0.00993604	0.00314823	0.00421823		leucine (2TMS)	leucine (2TMS)	12.387	158
lysine (4TMS)	lysine (4TMS)	26.968	174	3		0.0298982	0.0326853	0.0393423	0.0331853		0.0214569	0.0241111	0.0238953	0.0233806	0.031008		lysine (4TMS)	lysine (4TMS)	26.759	174
malate (3TMS)	malate	19.502	245	1		0.000286962	0.000268705	0.000315752	0.000372903		0.000729557	0.000550708	0.000527049	0.000448936	0.000550928		malate (3TMS)	malate	19.282	245
methionine (2TMS)	methionine (2TMS)	21.014	176	3		0.00233725	0.00250113	0.00161771	0.00160272		0.00159986	0.00151844	0.00153158	0.000680459	0.000976353		methionine (2TMS)	methionine (2TMS)	20.768	176
myo-inositol (6TMS)	myo-inositol	28.835	305	1		0.00291381	0.00310951	0.00378508	0.00382756		0.00241227	0.00244498	0.00231093	0.00226503	0.00237783		myo-inositol (6TMS)	myo-inositol	28.643	305
myristate (1TMS)	myristate	27.034	285	1		0.000273104	0.000321613	0.000251434	0.000196314		0.000338039	0.000436547	0.000372758	0.000332584	0.000328228		myristate (1TMS)	myristate	26.799	285
octadecanoic acid (1TMS)	octadecanoic acid	34.138	117	1		0.00714576	0.00665311	0.0063756	0.00609438		0.00844043	0.0110823	0.00818107	0.00962972	0.00761183		octadecanoic acid (1TMS)	octadecanoic acid	33.915	117
ornithine/arginine (4TMS)	ornithine+arginine (4TMS)	24.944	142	3		0.00939798	0.00992277	0.00929486	0.00777827		0.00700891	0.00747031	0.00700011	0.00302968	0.00372948		ornithine/arginine (4TMS)	ornithine+arginine (4TMS)	24.737	142
phenylalanine (2TMS)	phenylalanine (2TMS)	23.628	218	3		0.008412	0.00917944	0.00560879	0.0058208		0.00666066	0.00689306	0.00690928	0.00301685	0.00406119		phenylalanine (2TMS)	phenylalanine (2TMS)	23.367	218
phosphate (4TMS)	phosphate	14.528	387	1		0.00946934	0.00730852	0.0105745	0.00877116		0.0112763	0.0128736	0.0104311	0.00852217	0.00811221		phosphate (4TMS)	phosphate	14.302	387
proline (1TMS)	proline (1TMS)	14.318	142+216	1		0.00895784	0.00994719	0.00602327	0.00761176		0.00138816	0.00125575	0.00137323	0.000554796	0.000288837		proline (1TMS)	proline (1TMS)	14.055	142+216
putrescine (4TMS) (Un_0129)	putrescine (Un_0129)	21.895	174	1		0.0197509	0.0257005	0.0274415	0.0234872		0.0111273	0.0114788	0.0121277	0.0168096	0.0205162		putrescine (4TMS) (Un_0129)	putrescine (Un_0129)	21.676	174
pyruvate (2TMS)	pyruvate	9.442	174	1		0.000401015	0.000351766	0.000388319	0.000322461		0.000114307	9.65233e-05	8.28915e-05	0.000252837	0.000307819		pyruvate (2TMS)	pyruvate	9.166	174
serine (3TMS)	serine (3TMS)	15.304	204	3		0.00600499	0.00645931	0.00824844	0.00738451		0.00987707	0.0102635	0.010141	0.00911857	0.0113079		weighted sum of (serine (2TMS), serine (3TMS))	serine_effective	13.850/15.087	116/204
sorbitol (6TMS)	sorbitol	25.759	319	1		0.00164212	0.00204036	0.00152063	0.00137724		0.00168858	0.00159094	0.00147951	0.00148827	0.00239779		sorbitol (6TMS)	sorbitol	25.593	319
Spermidine (3TMS) (P3178)	spermidine (3TMS) (P3178)	31.583	174	3		0.000226887	3.0641e-05	0.000367117	0.00024641								Spermidine (3TMS) (P3178)	spermidine (3TMS) (P3178)	31.583	174
succinate (2TMS)	succinate	16.075	247	1		0.00410993	0.00451635	0.00263713	0.00271618		0.00222842	0.00195713	0.00195153	0.000690768	0.00133279		succinate (2TMS)	succinate	15.829	247
threonate (4TMS)	threonate	20.231	292	1		0.000369425	0.000542271	0.000429806	0.000398797		0.000600385	0.000551026	0.000504174	0.000492002	0.000513487		threonate (4TMS)	threonate	20.039	292
weighted sum of (threonine (2TMS), threonine (3TMS))	threonine_effective	14.689/15.703	(130+219)/(291+218)	3		0.0104597	0.0114658	0.010943	0.0111767		0.00769101	0.00752383	0.00750246	0.0080463	0.00894755		weighted sum of (threonine (2TMS), threonine (3TMS))	threonine_effective	14.499/15.490	(130+219)/(291+218)
trehalose (1TMS)	trehalose	39.454	361	2		0.150709	0.153821	0.210757	0.209066		0.209056	0.195605	0.197428	0.226268	0.22288		trehalose (1TMS)	trehalose	39.343	361
weighted sum of (tryptophan (2TMS), tryptophan (3TMS))	tryptophan_effective	37.601/35.986	202/202	3		0.0065002	0.00492787	0.00465321	0.00449626		0.00303612	0.00329905	0.00269518	0.00236323	0.00264173		weighted sum of (tryptophan (2TMS), tryptophan (3TMS))	tryptophan_effective	37.337/35.738	202/202
tyrosine NO (3TMS)	tyrosine NO (3TMS)	29.477	218	3		0.0158001	0.0123305	0.0146757	0.0136077		0.00975248	0.0108072	0.0113236	0.00624133	0.00780155		tyrosine NO (3TMS)	tyrosine NO (3TMS)	29.248	218
Un_0017 (P1091/C_041)	Un_0017 (P1091/C_041)	10.777	220	1		0.00307738	0.00459971	0.00442112	0.00368496		0.00445127	0.00448553	0.00622116	0.00422101	0.00516593		Un_0017 (P1091/C_041)	Un_0017 (P1091/C_041)	10.496	220
Un_0055 MeOx1 (A_116/f_26// RT: 27.611/QI:217// sugar)	Un_0055 MeOx1 (A_116/f_26// RT: 27.611/QI:217// sugar)	27.611	217	2		0.000827847	0.00109296	0.000690531	0.00121824		0.0010313	0.0010173	0.000812666	0.000795677	0.000865597		Un_0055 MeOx1 (A_116/f_26// RT: 27.611/QI:217// sugar)	Un_0055 MeOx1 (A_116/f_26// RT: 27.611/QI:217// sugar)	27.379	217
Un_0061(P3263/unknown_no115, fatty acid putatively)	Un_0061(P3263/unknown_no115, fatty acid putatively)	32.641	117	1		0.00197395	0.00213661	0.00153952	0.000845704		0.00161281	0.00219714	0.00145976	0.000965095	0.00108591		Un_0061(P3263/unknown_no115, fatty acid putatively)	Un_0061(P3263/unknown_no115, fatty acid putatively)	32.401	117
Un_0063 (a_39/x_2/U_032// RT:20.913/QI:263)	Un_0063 (a_39/x_2/U_032// RT:20.913/QI:263)	20.913	263	1		0.00191121	0.00272617	0.00215368	0.000700777		0.00154584	0.00152467	0.00126241	0.00138161	0.00151373		Un_0063 (a_39/x_2/U_032// RT:20.913/QI:263)	Un_0063 (a_39/x_2/U_032// RT:20.913/QI:263)	20.656	263
Un_0067 (P3458/a70/f_37// phospho-compound)	Un_0067 (P3458/a70/f_37// phospho-compound)	34.378	357	1		0.00282993	0.00235201	0.00558388	0.00522262		0.0026675	0.00306208	0.0036205	0.00207881	0.00242696		Un_0067 (P3458/a70/f_37// phospho-compound)	Un_0067 (P3458/a70/f_37// phospho-compound)	34.164	357
Un_0088 (K_47/A_077// RT:22.282/QI:188)	Un_0088 (K_47/A_077// RT:22.282/QI:188)	22.282	188	1		0.000432174	0.000371757	0.000545595	0.000516838		0.000197376	0.000155929	0.000194736	7.62173e-05	0.000221125		Un_0088 (K_47/A_077// RT:22.282/QI:188)	Un_0088 (K_47/A_077// RT:22.282/QI:188)	22.032	188
Un_0102 (P3188/U_062// fatty acid putatively)	Un_0102 (P3188/U_062// fatty acid putatively)	31.706	327	1		0.00102986	0.00114289	0.00107455	0.000616451		0.00111109	0.00148452	0.00107603	0.00110325	0.0012425		Un_0102 (P3188/U_062// fatty acid putatively)	Un_0102 (P3188/U_062// fatty acid putatively)	31.466	327
Un_0122 (A_102// RT:25.720/QI:217// sugar)	Un_0122 (A_102// RT:25.720/QI:217// sugar)	25.72	217	1		0.0015878	0.00222611	0.00123323	0.00160296		0.000919138	0.00168178	0.00163977	0.00100472	0.00118393		Un_0122 (A_102// RT:25.720/QI:217// sugar)	Un_0122 (A_102// RT:25.720/QI:217// sugar)	25.529	217
Un_0126 (A_170// RT:34.244/QI:339)	Un_0126 (A_170// RT:34.244/QI:339)	34.244	339	1		0.00208465	0.00223294	0.00242605	0.00141349		0.00276236	0.00364236	0.00287512	0.00292396	0.00313021		Un_0126 (A_170// RT:34.244/QI:339)	Un_0126 (A_170// RT:34.244/QI:339)	34.021	339
Un_0134 (P2957// sugar acid)	Un_0134 (P2957// sugar acid)	29.357	204	1		0.000338799	0.000317752	0.000299403	0.000249997		0.000196203	0.000216352	0.000256637	0.000145734	0.000162871		Un_0134 (P2957// sugar acid)	Un_0134 (P2957// sugar acid)	29.159	204
Un_0136 (P3960// fatty acid putatively)	Un_0136 (P3960// fatty acid putatively)	39.398	371	1		0.0746414	0.0777442	0.0615469	0.0674753		0.135136	0.124467	0.122739	0.202167	0.162631		Un_0136 (P3960// fatty acid putatively)	Un_0136 (P3960// fatty acid putatively)	39.211	371
Unrev_289 (P3502// sugar phosphate)	Unrev_289 (P3502// sugar phosphate)	34.756	387	1		0.00116603	0.000488443	0.00150247	0.00125525		0.00175142	0.00173421	0.00167524	0.0011114	0.00134612		Unrev_289 (P3502// sugar phosphate)	Unrev_289 (P3502// sugar phosphate)	34.579	387
urea (2TMS)	urea	14.881	189	1		0.0106187	0.0113039	0.00916544	0.0094159		0.0117618	0.0115391	0.0110299	0.00633182	0.00774537		urea (2TMS)	urea	14.612	189
weighted sum of (valine (2TMS), valine (3TMS))	valine_effective	10.970/11.652	144/(188+216+172)	3		0.0160126	0.0136893	0.0118165	0.0145922		0.0114395	0.0114443	0.0117964	0.00696419	0.00801851		weighted sum of (valine (1TMS), valine (2TMS), valine (3TMS))	valine_effective	8.925/10.723/11.383	72/144/(188+216+172)
vitamin B5 (Un_0060/P3075/a_68/unknown no 114)	vitamin B5 (Un_0060/P3075/a_68/unknown no 114)	30.583	291	1		0.000240561	0.000197243	0.000277492	0.000321552		0.000363327	0.000344621	0.000305763	0.000300282	0.000310098		vitamin B5 (Un_0060/P3075/a_68/unknown no 114)	vitamin B5 (Un_0060/P3075/a_68/unknown no 114)	30.335	291
Notes:
1. RT, QI stand for retention time and quantifying ion respectively.
2. Chemical Category is a number 1, 2 or 3 referring to categorization of metabolites based on their derivatization pattern as described in Kanani and Klapa (2007).
3. In some metabolites (mostly unknown), other names already used in publications of the group are provided in parenthesis to enable matching between datasets
4. For metabolites for which an effective relative peak area has been estimated based on a weighted summation of multiple derivatives, the RTs and Qis of these derivatives are shown in the RT and QI cell respectively (separated by /)
* In Sample Collection 2, tomm40(RNAi) was not divided into a, b parts, because pellet weight was small.
